# Supplementary material for: Quality of life and disease experience in patients with heart failure with reduced ejection fraction in Spain: a mixed-methods study
Source: PubMed Central journal article supplement — BMJ Open. 2021 Dec 3;11(12):e053216. doi: 10.1136/bmjopen-2021-053216 (PMC8647550; doi:10.1136/bmjopen-2021-053216), 2021-12-03
Supplement: bmjopen-2021-053216.draft_revisions.pdf [file bmjopen-2021-053216.draft_revisions.pdf]

# BMJ Open

BMJ Open is committed to open peer review. As part of this commitment we make the peer review history of every article we publish publicly available.

When an article is published we post the peer reviewers' comments and the authors' responses online. We also post the versions of the paper that were used during peer review. These are the versions that the peer review comments apply to.

The versions of the paper that follow are the versions that were submitted during the peer review process. They are not the versions of record or the final published versions. They should not be cited or distributed as the published version of this manuscript.

BMJ Open is an open access journal and the full, final, typeset and author-corrected version of record of the manuscript is available on our site with no access controls, subscription charges or pay-per-view fees (<http://bmjopen.bmj.com>).

If you have any questions on BMJ Open's open peer review process please email [info.bmjopen@bmj.com](mailto:info.bmjopen@bmj.com)

# BMJ Open

## Quality of life and disease experience in patients with heart failure with reduced ejection fraction in Spain: an ethnographic study

|                               |                                                                                                                                                                                                                                                                                                                                                                                                                                                                                                                                                                                                                                                                                                                                                                                                                                                                                                                                                                                                                                                                                                                                                                                                                                                                                                                                                                                                                                                                                                                                                                                                                                                                                                                                                                                                                                                                                                                                                                                                                                                                                                                                                                                                                                                                                                                                                                                                                |
|-------------------------------|----------------------------------------------------------------------------------------------------------------------------------------------------------------------------------------------------------------------------------------------------------------------------------------------------------------------------------------------------------------------------------------------------------------------------------------------------------------------------------------------------------------------------------------------------------------------------------------------------------------------------------------------------------------------------------------------------------------------------------------------------------------------------------------------------------------------------------------------------------------------------------------------------------------------------------------------------------------------------------------------------------------------------------------------------------------------------------------------------------------------------------------------------------------------------------------------------------------------------------------------------------------------------------------------------------------------------------------------------------------------------------------------------------------------------------------------------------------------------------------------------------------------------------------------------------------------------------------------------------------------------------------------------------------------------------------------------------------------------------------------------------------------------------------------------------------------------------------------------------------------------------------------------------------------------------------------------------------------------------------------------------------------------------------------------------------------------------------------------------------------------------------------------------------------------------------------------------------------------------------------------------------------------------------------------------------------------------------------------------------------------------------------------------------|
| Journal:                      | <i>BMJ Open</i>                                                                                                                                                                                                                                                                                                                                                                                                                                                                                                                                                                                                                                                                                                                                                                                                                                                                                                                                                                                                                                                                                                                                                                                                                                                                                                                                                                                                                                                                                                                                                                                                                                                                                                                                                                                                                                                                                                                                                                                                                                                                                                                                                                                                                                                                                                                                                                                                |
| Manuscript ID                 | bmjopen-2021-053216                                                                                                                                                                                                                                                                                                                                                                                                                                                                                                                                                                                                                                                                                                                                                                                                                                                                                                                                                                                                                                                                                                                                                                                                                                                                                                                                                                                                                                                                                                                                                                                                                                                                                                                                                                                                                                                                                                                                                                                                                                                                                                                                                                                                                                                                                                                                                                                            |
| Article Type:                 | Original research                                                                                                                                                                                                                                                                                                                                                                                                                                                                                                                                                                                                                                                                                                                                                                                                                                                                                                                                                                                                                                                                                                                                                                                                                                                                                                                                                                                                                                                                                                                                                                                                                                                                                                                                                                                                                                                                                                                                                                                                                                                                                                                                                                                                                                                                                                                                                                                              |
| Date Submitted by the Author: | 07-May-2021                                                                                                                                                                                                                                                                                                                                                                                                                                                                                                                                                                                                                                                                                                                                                                                                                                                                                                                                                                                                                                                                                                                                                                                                                                                                                                                                                                                                                                                                                                                                                                                                                                                                                                                                                                                                                                                                                                                                                                                                                                                                                                                                                                                                                                                                                                                                                                                                    |
| Complete List of Authors:     | <p>Rubio, Raül; Piece of Pie, Palacios, Beatriz; AstraZeneca Farmacéutica Spain SA<br/> Varela, Luis; AstraZeneca Farmacéutica Spain SA<br/> Fernández de la Fundación, Raquel; AstraZeneca Farmacéutica Spain SA<br/> Camargo Correa, Selene; Piece of Pie<br/> Estupiñan, María Fernanda; Piece of Pie<br/> Calvo, Elena; Bellvitge University Hospital, Cardiology and Heart Failure Program; Bellvitge Institute for Biomedical Research, BIO-HEART Cardiovascular Diseases Research Group<br/> José, Nuria; Bellvitge University Hospital, Cardiology and Heart Failure Program; Bellvitge Institute for Biomedical Research, BIO-HEART Cardiovascular Diseases Research Group<br/> Ruiz Muñoz, Marta; Bellvitge University Hospital, Cardiology and Heart Failure Program; Bellvitge Institute for Biomedical Research, BIO-HEART Cardiovascular Diseases Research Group<br/> Yun, Sergi; Bellvitge University Hospital, Cardiology and Heart Failure Program; Bellvitge Institute for Biomedical Research, BIO-HEART Cardiovascular Diseases Research Group<br/> Jiménez-Marrero, Santiago; Bellvitge University Hospital, Cardiology and Heart Failure Program; Bellvitge Institute for Biomedical Research, BIO-HEART Cardiovascular Diseases Research Group<br/> Alcoberro, Lidia; Bellvitge University Hospital, Cardiology and Heart Failure Program; Bellvitge Institute for Biomedical Research, BIO-HEART Cardiovascular Diseases Research Group<br/> Garay, Alberto; Bellvitge University Hospital, Cardiology and Heart Failure Program; Bellvitge University Hospital, Cardio-Oncology Unit<br/> Moliner, Pedro; Bellvitge University Hospital, Cardiology and Heart Failure Program; Bellvitge University Hospital, Cardio-Oncology Unit<br/> Sánchez-Fernández, Lydia; Bellvitge University Hospital, Cardiology and Heart Failure Program; Bellvitge University Hospital, Cardio-Oncology Unit<br/> Soria Gómez, María Teresa; Puerta de Hierro University Hospital of Majadahonda, Heart Failure Unit<br/> Hidalgo, Encarna; Bellvitge University Hospital, Cardiology and Heart Failure Program; Bellvitge Institute for Biomedical Research, BIO-HEART Cardiovascular Diseases Research Group<br/> Enjuanes, C; Bellvitge University Hospital, Cardiology and Heart Failure Program; Bellvitge Institute for Biomedical Research, BIO-HEART Cardiovascular Diseases Research Group</p> |

|           |                                                                                                                                                                                                                                                                                                                                                                                                                                                                                                                                                                                                                                                                                                                                                                                                                                                                   |
|-----------|-------------------------------------------------------------------------------------------------------------------------------------------------------------------------------------------------------------------------------------------------------------------------------------------------------------------------------------------------------------------------------------------------------------------------------------------------------------------------------------------------------------------------------------------------------------------------------------------------------------------------------------------------------------------------------------------------------------------------------------------------------------------------------------------------------------------------------------------------------------------|
|           | Calero-Molina, Esther; Bellvitge University Hospital, Cardiology and Heart Failure Program; Bellvitge Institute for Biomedical Research, BIO-HEART Cardiovascular Diseases Research Group<br>Rueda, Yolanda; CardioAlianza<br>San Saturnino, Maite; CardioAlianza<br>Garcimartín, Paloma; Hospital del Mar, Outpatients Clinics; Hospital del Mar Institute for Medical Research, Biomedical Research in Heart Diseases<br>López-Ibor, Jorge; Puerta de Hierro University Hospital of Majadahonda, Cardiology<br>Segovia-Cubero, Javier; Puerta de Hierro University Hospital of Majadahonda, Cardiology; Carlos III Health Institute, CIBER of Cardiovascular Diseases<br>Comin-Colet, Josep; Bellvitge University Hospital, Cardiology and Heart Failure Program; Bellvitge Institute for Biomedical Research, BIO-HEART Cardiovascular Diseases Research Group |
| Keywords: | Heart failure < CARDIOLOGY, Quality in health care < HEALTH SERVICES ADMINISTRATION & MANAGEMENT, QUALITATIVE RESEARCH                                                                                                                                                                                                                                                                                                                                                                                                                                                                                                                                                                                                                                                                                                                                            |
|           |                                                                                                                                                                                                                                                                                                                                                                                                                                                                                                                                                                                                                                                                                                                                                                                                                                                                   |

SCHOLARONE™  
Manuscripts

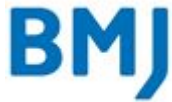

I, the Submitting Author has the right to grant and does grant on behalf of all authors of the Work (as defined in the below author licence), an exclusive licence and/or a non-exclusive licence for contributions from authors who are: i) UK Crown employees; ii) where BMJ has agreed a CC-BY licence shall apply, and/or iii) in accordance with the terms applicable for US Federal Government officers or employees acting as part of their official duties; on a worldwide, perpetual, irrevocable, royalty-free basis to BMJ Publishing Group Ltd ("BMJ") its licensees and where the relevant Journal is co-owned by BMJ to the co-owners of the Journal, to publish the Work in this journal and any other BMJ products and to exploit all rights, as set out in our [licence](#).

The Submitting Author accepts and understands that any supply made under these terms is made by BMJ to the Submitting Author unless you are acting as an employee on behalf of your employer or a postgraduate student of an affiliated institution which is paying any applicable article publishing charge ("APC") for Open Access articles. Where the Submitting Author wishes to make the Work available on an Open Access basis (and intends to pay the relevant APC), the terms of reuse of such Open Access shall be governed by a Creative Commons licence – details of these licences and which [Creative Commons](#) licence will apply to this Work are set out in our licence referred to above.

Other than as permitted in any relevant BMJ Author's Self Archiving Policies, I confirm this Work has not been accepted for publication elsewhere, is not being considered for publication elsewhere and does not duplicate material already published. I confirm all authors consent to publication of this Work and authorise the granting of this licence.

Original research

# Quality of life and disease experience in patients with heart failure with reduced ejection fraction in Spain: an ethnographic study

Raül Rubio,<sup>1</sup> Beatriz Palacios,<sup>2</sup> Luis Varela,<sup>2</sup> Raquel Fernández de la Fundación,<sup>2</sup> Selene Camargo Correa,<sup>1</sup> María Fernanda Estupiñan,<sup>1</sup> Elena Calvo,<sup>3,4</sup> Nuria José,<sup>3,4</sup> Marta Ruiz Muñoz,<sup>3,4</sup> Sergi Yun,<sup>3,4</sup> Santiago Jiménez-Marrero,<sup>3,4</sup> Lidia Alcoberro<sup>3,4</sup> Alberto Garay,<sup>3,5</sup> Pedro Moliner,<sup>3,5</sup> Lydia Sánchez-Fernández,<sup>3,5</sup> María Teresa Soria Gómez,<sup>6</sup> Encarna Hidalgo,<sup>3,4</sup> Cristina Enjuanes,<sup>3,4</sup> Esther Calero-Molina,<sup>3,4</sup> Yolanda Rueda,<sup>7</sup> Maite San Saturnino,<sup>7</sup> Paloma Garcimartín,<sup>8,9</sup> Jorge V. López-Ibor,<sup>10</sup> Javier Segovia-Cubero,<sup>11,12</sup> Josep Comin-Colet<sup>3,4,13</sup>

1. A Piece of Pie SL, Barcelona, Spain
2. AstraZeneca Farmacéutica Spain SA, Madrid, Spain
3. Cardiology Department and Heart Failure Program, Bellvitge University Hospital, Hospitalet de Llobregat, Barcelona, Spain
4. BIO-HEART Cardiovascular Diseases Research Group, Bellvitge Biomedical Research Institute (IDIBELL), Hospitalet de Llobregat, Barcelona, Spain
5. Cardio-Oncology Unit, Bellvitge University Hospital, Catalan Institute of Oncology, L'Hospitalet de Llobregat, Spain
6. Heart Failure Unit, Puerta de Hierro University Hospital, Majadahonda, Madrid, Spain
7. CardioAlianza, Barcelona, Spain
8. Outpatient Clinics, Hospital del Mar, Parc de Salut Mar, Barcelona, Spain

- 1  
2  
3 9. Biomedical Research in Heart Diseases, Hospital del Mar, Medical Research  
4  
5 Institute (IMIM), Barcelona, Spain  
6  
7 10. Outpatient Heart Failure Clinic, Department of Cardiology, Puerta de Hierro  
8  
9 University Hospital, Majadahonda, Madrid, Spain  
10  
11 11. Department of Cardiology, Puerta de Hierro University Hospital, Majadahonda,  
12  
13 Madrid, Spain  
14  
15 12. CIBER of Cardiovascular Diseases, Carlos III Institute, Madrid, Spain  
16  
17 13. Department of Clinical Sciences, School of Medicine, University of Barcelona,  
18  
19 Barcelona, Spain  
20  
21  
22  
23  
24  
25

26 Correspondence to: Raül Rubio, A Piece of Pie SL, Aribau 179, 08036 Barcelona,  
27  
28 Spain

29  
30 Email: raul@piecepie.com  
31  
32  
33  
34  
35  
36  
37  
38  
39  
40  
41  
42  
43  
44  
45  
46  
47  
48  
49  
50  
51  
52  
53  
54  
55  
56  
57  
58  
59  
60

Word count: 3,746

## ABSTRACT

**Objectives:** To gather insights on the disease experience of patients with heart failure with reduced ejection fraction (HFrEF), assessing the correlation between patients' experiences and narratives related to the disease and data collected through standardized patient-reported outcome measures (PROMs). Also, to explore new ways of evaluating the burden experienced by patients and caregivers.

**Design:** Observational, descriptive, multicenter, cross-sectional, qualitative study.

**Setting:** Secondary care, patient's homes.

**Participants:** Twenty patients with HFrEF (NYHAs I-III) aged 38-85 years.

**Measures:** PROMs EuroQoL 5D-5L and Kansas City Cardiomyopathy Questionnaire and patient interview and observation.

**Results:** A total of 20 patients with HFrEF participated in the study. The patients' mean (SD) age was 72.5 (11.4) years, 65% were male, and were classified in NYHA functional classes I (N=4), II (N=7) and III (N=9). The study showed a strong impact of HF in the patients' quality of life (QoL) and disease experience, as revealed by the in-depth interviews and the standardized PROMs. Patients and caregivers often disagreed describing and evaluating perceived QoL. Patients related current QoL to distant life experiences or to critical moments in their disease, such as hospitalizations. Anxiety over the disease progression is apparent in both patients and caregivers, suggesting that caregiver-specific tools should be developed.

**Conclusions:** PROMs are an effective way of assessing symptoms over the most recent time period. However, especially in chronic diseases such as HFrEF, PROM scores could be complemented with additional tools to gain a better understanding of the patient's status. New PROMs designed to evaluate and compare specific points in the life of the patient could be clinically more useful to assess changes in health status.

### Strengths and limitations of this study

- This study followed an ethnographic approach to collect data on patient's experiences and narratives related to heart failure, a type of study not before carried out in Spain and with scarce reports worldwide.
- Both patients and caregivers could discuss freely and explain in detail the aspects of the disease that they considered under control and those where change was deemed necessary.
- The often-contrasting views of patients and caregivers highlighted the difficulties in obtaining accurate and objective evaluations of quality of life.
- Although the selection of patients aimed for inclusiveness and diversity, the limited number of HFrEF patients selected for in-depth analysis may not be fully representative of the population of HFrEF patients in Spain.
- The ethnographic interviews took place in the context of the COVID-19 pandemic, which transformed the daily routines of patients and caregivers and may have to a certain extent altered their perspective of living with HFrEF.



## INTRODUCTION

Despite advances in treatment, heart failure (HF) remains one of the leading causes of hospitalization and readmissions, death and disability worldwide.<sup>1,2</sup> The economic burden of HF, mainly driven by recurrent hospitalizations, consumes an estimated 1-2% of healthcare budgets.<sup>3,4</sup> The progressive aging of the population in some Western countries, such as Spain, and increasing HF prevalence, have positioned this disease as a major public health problem.<sup>5-7</sup>

Clinically, HF can be classified based on the left ventricular ejection fraction (LVEF) into HF with reduced ejection fraction (HFrEF), defined as an EF  $\leq 40\%$ , mid-range ejection fraction (HFmrEF), defined as EF  $>40\%$  and  $<50\%$ , and HF with preserved ejection fraction (HFpEF), defined as an ejection fraction  $\geq 50\%$ .<sup>8</sup> Patients in these subgroups often have distinct underlying etiologies, demographics, comorbidities and response to therapies.<sup>9,10</sup> Additionally, the presence and severity of symptoms and exercise intolerance of patients with HF is usually categorized following the New York Heart Association (NYHA) classification into four functional classes (I-IV), being class IV the worst.<sup>11</sup>

HF can severely affect the quality of life (QoL) of the patient by reducing their independence and ability to undertake daily living activities, and can also disturb their mental health and psychosocial well-being.<sup>12,13</sup> Prior studies have shown that patients with HF had an even higher incidence of limitations than patients with chronic diseases such as diabetes, cancer, or Alzheimer's disease.<sup>13</sup> Several patient-reported outcome measures (PROMs) have been used to quantify health status in patients with HF, such as the generic EuroQoL 5D-5L (EQ-5D-5L) and the disease-specific Kansas City Cardiomyopathy Questionnaire (KCCQ).<sup>13-17</sup> PROMs such as the KCCQ have a good correlation with prognosis and their use has been encouraged by the American Heart Association in both routine clinical practice and clinical trials of new therapies.<sup>18,19</sup> However, although these PROMs can be useful indicators of health status and how HF

1  
2  
3 impacts patients' QoL within a 2-week recall period, they have not been designed to  
4 reflect some of the patient's and caregiver's perspectives on living with HF, including  
5 aspects such as the importance of interactions with family or healthcare providers,  
6 feelings related to the course of their disease, or barriers to accessing healthcare  
7 resources.<sup>20</sup> These unique aspects of culture, preferences, customs, values and  
8 attitudes, could have an impact on treatment effectiveness and outcomes.

9  
10  
11  
12  
13  
14  
15 Complementary to PROMs, patient-reported experience measures (PREMs) are useful  
16 to evaluate quality of patient care and the interaction between the patient and the  
17 healthcare system.<sup>21,22</sup> However, neglecting the limitations of both PREMs and PROMs  
18 could hinder our understanding of the patient's attitudes and real-life disease  
19 experiences.  
20  
21  
22  
23  
24  
25

26  
27  
28  
29  
30  
31  
32  
33  
34  
35  
36  
37  
38  
39  
40  
41  
42  
43  
44  
45  
46  
47  
48  
49  
50  
51  
52  
53  
54  
55  
56  
57  
58  
59  
60  
Ethnographic qualitative studies involve observation of the patients and  
caregivers in their real-world settings to determine how they behave in specific  
contexts. Ethnographic research collects comprehensive information from multiple  
sources such as interviews, caregiver perspectives, non-participant observation of  
healthcare visits and home tours, among others, and has previously been carried out to  
investigate QoL in patients with HF.<sup>12,23–28</sup> Previous ethnographic studies conducted in  
patients from the United Kingdom identified barriers to interventions for HF and critical  
points on disease pathways which resulted in an increase in the risk of admission.<sup>29–31</sup>

Little is known about the patient's and caregiver's perspective of living with HF,  
and no study in this context has been performed in Spain. The objective of this study  
was to gather insights on the disease experiences of patients with HFrEF and their  
caregivers, and the impact on their everyday life. The parallel use of an ethnographic  
approach with PROMs for the assessment of health status (EQ-5D-5L and KCCQ)  
allowed qualitative comparison of both types of results. The goal was to improve  
awareness of healthcare professionals, service providers, policy makers and educators  
on the factors that can potentially influence treatment effectiveness, and the existence  
of aspects of the patient's experience that are not covered by existing tools. In turn, this

1  
2  
3 may encourage firstly, a more active participation of healthcare providers, patients and  
4  
5 caregivers in clinical decisions considering not only the disease state, but also cultural  
6  
7 factors and individual values and attitudes, and secondly, the development of  
8  
9 instruments for the evaluation of healthcare interventions.  
10  
11  
12  
13  
14  
15  
16  
17  
18  
19  
20  
21  
22  
23  
24  
25  
26  
27  
28  
29  
30  
31  
32  
33  
34  
35  
36  
37  
38  
39  
40  
41  
42  
43  
44  
45  
46  
47  
48  
49  
50  
51  
52  
53  
54  
55  
56  
57  
58  
59  
60

For peer review only

## METHODS

This was an observational, descriptive, multicenter, cross-sectional, qualitative study to obtain insights regarding HFrEF patients' perception and attitudes towards their disease. The patients in the study were recruited at the Departments of Cardiology of 2 large tertiary-level hospitals, namely, the Puerta del Hierro University Hospital (Majadahonda, Madrid, Spain) and the Bellvitge University Hospital (Hospitalet de Llobregat, Barcelona, Spain). The patient populations attended by these hospitals were socioeconomically very distinct, as the Puerta del Hierro University Hospital is located at a high-income district of Madrid, and the Bellvitge University Hospital covers a suburban area of mostly low or very low-income patients. Due to the qualitative and observational design of the study, there was no masking or randomization. Clinical management of the patients followed routine clinical practice, with no changes in treatment or additional clinical assessments specific for this study. All decisions related to disease management were made at the discretion of the treating physician without interference by the sponsor. Informed consent was obtained from each patient prior to study initiation. The study protocol was approved by the Ethics Review Board of the Bellvitge University Hospital on March 12<sup>th</sup>, 2020 with number PR062/20.

### *Patients*

Patients were assessed for eligibility by local clinical staff according to selection criteria at each participating center. Patients were classified by NYHA class and could be belong to any of the 4 classes I to IV. The inclusion criteria were  $\geq 18$  years at the time of consent, established documented diagnosis of HFrEF (LVEF  $\leq 40\%$ ), and signed consent to participate. Patients unable to complete the PROMs because of any psychological or physical condition and patients hospitalized at inclusion were excluded.

### **Data collection**

The patient's demographic information and medical history were collected from medical records at the selection visit. On the day of the home visit the patients first completed two health status questionnaires and then a multidisciplinary team composed of social scientists conducted a semi-structured interview following a topic guide to allow respondents to express their experiences and feelings related to HF. The topic guide was organized in 6 domains: 1, personal life account and current context; 2, life experience with previous diseases and current comorbidities; 3, living and personal experience with HF; 4, perception of QoL before and after diagnosis of the disease; 5, relationship with the caregiver and its environment; and 6, relationship with healthcare providers. The interview conducted at the patient's home lasted approximately 90 minutes. In some instances, with the consent of the patient, his/her closest caregivers were interviewed at the patient's home on the same day for about 30 min. The interview with the caregivers aimed at understanding their perception of the patient's status and evaluating their social and emotional relationship with the patient.

Selected patients were accompanied to the first healthcare appointment after the interview. In the interaction with healthcare providers researchers focused on the initial and main topics of conversation with healthcare provider, questions by patients and caregivers, and general attitude of patients. Also patients and caregivers were asked to evaluate the medical visit. Researchers added analytical and reflexive comments to field notes immediately after conducting interviews and observations.

The in-depth interview aimed to capture the patients' experience with the disease from their own point of view, whereas the non-participant observation during the medical visits allowed to investigate the relationship with the healthcare practitioners for both of patients and family members.

Data were collected by audio recording and notes, taking into consideration all aspects of the patient's life and in all cases protecting the patient's data privacy. Subsequently, data triangulation was used to integrate quantitative and qualitative

1  
2  
3 information by ethnographers, individually and in joint sessions. The analytical process  
4  
5 aimed to reach theoretical saturation.  
6  
7  
8

### 9 ***Outcomes and assessments***

10  
11 The following primary variables were assessed: the patient's profile; the patient's  
12  
13 emotional perception (values, attitude, frustration, fear) during the HFrEF journey,  
14  
15 including the role of the caregiver; key relationships and communication processes  
16  
17 during the patient HFrEF journey (patient-doctor, patient-carer/family); main barriers to  
18  
19 accessing healthcare services experienced by patients during the HFrEF journey; and  
20  
21 the patient's unmet needs (cognitive, emotional and functional) associated with HF.  
22  
23

24  
25 Secondary variables assessed included PROMs by using the EQ-5D-5L and  
26  
27 KCCQ. The EQ-5D-5L is a self-reported questionnaire used to derive a standardized  
28  
29 measure of health status, also referred to as a utility score.<sup>32</sup> The KCCQ is a self-  
30  
31 administered HF-specific instrument and has shown to be a valid, reliable and  
32  
33 responsive measure for patients with HF.<sup>14</sup> Spanish validated versions of these  
34  
35 questionnaires were used.<sup>33,34</sup> For the EQ-5D-5L, the number and percentage of  
36  
37 patients reporting any type of limitation for each questionnaire dimension, the number  
38  
39 and percentage of patients reporting "severe" or "extreme" responses for each  
40  
41 questionnaire dimension, as well as the index value and the visual analogue scale  
42  
43 (VAS) score, were assessed; for the KCCQ, the score for each domain/subdomain,  
44  
45 and a summary score for the total symptom score, clinical symptom score and overall  
46  
47 summary score were assessed.  
48  
49  
50

### 51 ***Statistical methods***

52  
53 Observational data, interviews and documentary materials were analyzed at three  
54  
55 levels: individual patient cases, across cases within research centers, and across  
56  
57 research centers to synthesis. The PROMs were analyzed descriptively.  
58  
59  
60

## RESULTS

### *Patient characteristics*

A total of 20 patients with HFrEF participated in the study (Table 1). The mean (SD) age of the patients was 72.5 (11.4) years (range, 38-85 years), and 13 (65.0%) were male. The study included 4, 7 and 9 patients in NYHA functional classes I-III, respectively. Although the study protocol was designed to include class IV patients, their frailty, and the effects of the COVID-19 pandemic in the patients' self-caring strategies, hindered the participation of any patients in this class. Twelve patients were being treated at the Bellvitge University Hospital and 8 patients were being treated at the Puerta del Hierro University Hospital.

### *Understanding of QoL by patients with HF*

During the in-depth interviews, the participants described how living with HFrEF impacted their lives, including how they experienced the symptoms of HF and their effects on daily routines (summarized in Table 3). Their responses provided relevant insights on what QoL meant to them. For many patients, QoL was "being able to do what they did before" and missed being independent, their everyday life and maintaining an active lifestyle.

Patients tended to self-limit and isolate to limit symptomatology due to progression-related fears or even fear to a sudden death, despite a more sedentary lifestyle being detrimental to the recovery and to their own QoL.

### *Impact of demographic factors in perception of QoL*

1  
2  
3 Attitudes and perceptions towards HFrEF seemed to strongly depend on age and  
4 education. Young patients tend to be more informed about the disease and challenge  
5 the healthcare practitioners' opinions.  
6  
7

8  
9 In contrast, older patients had a difficult time differentiating between HFrEF  
10 symptoms and those associated with the normal process of ageing. Often caregivers  
11 had to help them understand the information provided by healthcare workers.  
12  
13

14  
15 The interviews also revealed that male patients showed more dependency towards  
16 caregivers than their female counterparts. Female caregivers tended to strongly  
17 challenge male patients' perception of QoL. In one case, the wife of a 63-year old  
18 NYHA III patient was very critical of her husband's attitude and thought that part of his  
19 evolution strongly depended on his will, and asked him to exercise more, read, get on  
20 the computer, and go out for a ride on the motorcycle. They even consulted with a  
21 psychologist friend to help them handle the situation.  
22  
23  
24  
25  
26  
27  
28  
29  
30  
31

### 32 ***PROMs and health status***

33  
34 The results of the EQ-5D-5L and KCCQ showed a high correlation with the NYHA  
35 functional classes, and also between the two PROMs (Table 2). No differences were  
36 observed in scores with respect to gender, or between the patients from the two  
37 hospitals.  
38  
39  
40  
41  
42

43 Some patients with lower NYHAs, despite having visible constraints in health  
44 status, indicated high scores in the EQ-5D-5L VAS score. For example, a 76-year-old  
45 female with major comorbidities [patient 1-10] with NYHA I indicated a EQ-5D-5L VAS  
46 score of 90 and emphasized that her QoL was good. This contrasted with the views  
47 expressed by her caregiver.  
48  
49  
50  
51  
52

53 Regardless of the NYHA, some patients seemed to minimize and relativize the  
54 impact of HFrEF on their QoL. Caregivers, in contrast, could emphasize the limitations  
55 imposed by HFrEF. For example, the wife and caregiver of a 79-year-old, NYHA II  
56 male patient [1-11] indicated that in the consultation with the cardiologist the patient  
57  
58  
59  
60



1  
2  
3 usually underestimated his condition. In another case, the wife of a 74-year-old NYHA  
4  
5 III male patient commented that she must be “present with the doctors, because when  
6  
7 they ask him something, he usually answers that he is fine and does not really say  
8  
9 what is wrong with him.”  
10

11 Patients with advanced NYHAs, who experienced one or several hospital  
12  
13 admissions, compared their current experience with the disease to those acute periods  
14  
15 of fear and greater uncertainty. Patients showed a limited portrait of their QoL due to  
16  
17 the required reference to the last 2-weeks in the questionnaire. For example, a NYHA  
18  
19 III male patient [2-8] had doubts when filling out the questionnaires since he related his  
20  
21 mobility limitations to a problem with his legs (a consequence of an aortic dissection)  
22  
23 but he did not relate it to HF. Also, he mentioned that his physical and emotional  
24  
25 situation was much better now compared to the initial moments where he was more  
26  
27 affected. He had a hard time taking the prior two weeks as a reference point, therefore  
28  
29 his responses showed a feeling of improvement compared to the most critical  
30  
31 moments.  
32  
33

34 Another NYHA III patient [2-6] had doubts when filling the questionnaires, since  
35  
36 his symptoms varied from day to day and between morning, afternoon and night. He  
37  
38 also had moments of crises where he considered his symptoms to be worse, so limiting  
39  
40 to the last two weeks seemed difficult. Likewise, he stated that shortness of breath or  
41  
42 air was something he thought he got from lying down for a long time and not that it was  
43  
44 a symptom of HFrEF.  
45  
46

47 Caregivers could overestimate and present a dramatic view of the patient's day-  
48  
49 to-day life with HFrEF. Family caregivers showed more distress when discussing their  
50  
51 relatives with HFrEF compared to that showed by remunerated caregivers:  
52  
53  
54

55 *“she is concerned about his low spirits and his anguish. She says that the*  
56  
57 *symptoms she develops from anxiety can “mask” the symptoms of HF,*  
58  
59  
60

1  
2  
3 *such as pressure and pain in the chest, agitation, a feeling of suffocation.”*

4  
5 [caregiver of patient 1-8, NYHA III]

6  
7  
8  
9 *“As cardiologists told us that little can be done to improve his condition, we*  
10  
11 *live these years ‘as a gift’.”* [caregiver of patient 1-6]

### 12 13 14 15 **Caregivers’ roles and needs**

16  
17 In this study, only five patients were able to live without a caregiver. Generally, strong  
18 family bonds were apparent and important for the patient. Caregivers were often in  
19 charge of organizing visits to the healthcare providers, keeping track of parameters  
20 such as weight and blood pressure, and administering medication. Caregivers acted  
21 also as interpreters of the disease status on behalf of their patients.  
22  
23  
24  
25  
26  
27  
28  
29

### 30 31 **Relationships with healthcare providers**

32 The interactions between patients and caregivers with healthcare workers at  
33 hospitals were investigated by the social scientists by accompanying them to a  
34 medical appointment. The study showed that patients are usually highly positive  
35 about their experience with cardiologists and nurses. A 58-year-old male patient  
36 [1-9] explained that the nurse called him weekly to ask about how he was  
37 coping, and to discuss data such as weight and blood pressure changes. He  
38 generally felt very accompanied by the hospital staff, both cardiologists and  
39 nurses. Other patients also expressed a high opinion of the healthcare  
40 personnel. Often patients highly value their relationship with the nurse, as they  
41 probably feel more confident to express their experiences to his/her.  
42  
43  
44  
45  
46  
47  
48  
49  
50  
51  
52  
53  
54  
55  
56  
57  
58  
59  
60

## DISCUSSION

In this study we used ethnographic methods with HFREF patients and their caregivers, complemented with general and disease-specific health status assessments, to obtain insights regarding patients' disease perception and attitudes towards their disease.

Ethnographic methods adopt a phenomenological perspective, aiming to understand individuals' life experiences to acquire relevant knowledge. The results of this study suggest that the patient's perspectives of their QoL were dependent on their memories of what they could do before, and often were better than reality. Caregivers, in contrast, offered a distinct view of the patient's status and QoL, often substantially worse and emphasizing the severity of their life-limiting condition.

As healthcare systems aim to become more 'patient-centered', there is a recognized need to capture accurately the patient's experience of the disease, in an effort to improve it. The use of various forms of PREMs and PROMs have therefore become common in assessing current treatments and new therapies and medical interventions, although their application in clinical practice is still very limited. Despite their widespread use by cardiologists, an awareness of the limitations of PROMs when evaluating the experience of the patient with HF is critical for their interpretation. For example, the effects of comorbid conditions could add confounding factors to the evaluation of HF through a single PROM instrument. Likewise, patients often relate their overall QoL experience to the moments of crisis, such as hospitalizations, 'anchoring' all subsequent experiences to those events and distorting their responses in the questionnaires.

In the general population the understanding of HF and its outcome is low, contributing to anxiety about the evolution of the disease in both patients and caregivers. In contrast, other life-limiting diseases, such as cancer, often have better-defined pathways of care and psychosocial support.<sup>31</sup> In this regard, patient associations and support groups could play a role by helping the patient understand

1  
2  
3 the disease, the treatments, and the expectations. Patient associations promote social  
4 integration and help patient share their experiences, providing the necessary  
5 encouragement to cope with their disease and go on with daily activities. Also, as  
6 reflected in some of the interviews described in this study, it is important for the patient  
7 to feel that he/she can have rapid access to medical services. In this regard, the study  
8 reflected that that while some patients were reluctant to discuss aspects of daily life or  
9 to express their feelings and fears to the cardiologist, they were more open and felt  
10 closer to the nurse, a relationship that was highly valued by many patients. Generally,  
11 an efficient and fluid communication with all the healthcare providers involved in the  
12 treatment is essential.<sup>12,30</sup>

23  
24 The study revealed that the fear to losing independence and the uncertainty  
25 about the progress of their disease could be factors that motivate some HF patients to  
26 downplay their limitations. Conversely, caregivers could overemphasize the poor QoL  
27 of the patients, also motivated by concerns of the progress of the disease, its  
28 unpredictable trajectory, and lack of proper knowledge and training. Also, it is possible  
29 that, since these caregivers were very often family members, their views could be  
30 overstated due to emotional attachment to the patient. In any case, these results  
31 suggest that instruments should be developed to help caregivers in their daily work with  
32 patients with HF, so that they are better informed on the course of the disease and  
33 expectations.<sup>26</sup> In this regard, numerous recent studies have highlighted challenges  
34 experienced by caregivers of patients with HF.<sup>35-38</sup> Some initiatives along these lines,  
35 such as caregiver-specific QoL questionnaires,<sup>39</sup> and video coaching,<sup>40,41</sup> are currently  
36 being developed and tested.

37  
38  
39  
40  
41  
42  
43  
44  
45  
46  
47  
48  
49  
50  
51 The results of our study suggest recommendations for future PROM design or  
52 questionnaire selection. In patients with HF the PROM instruments should aim to truly  
53 mirror patients' experience, using language that the patient associates with their  
54 cultural views of QoL. To provide insights on relevant changes in QoL, the PROMs  
55 should be constructed to capture specific timepoints related to the patient experience  
56  
57  
58  
59  
60

1  
2  
3 (e.g., healthcare status before the diagnosis, and before and after hospitalizations). In  
4  
5 this way, reference points in the patient's lives could be established that favored  
6  
7 meaningful QoL before/after comparisons. Instruments should allow an alternative  
8  
9 stratification based on these clinical events and patients' perceived QoL along them.  
10  
11 Also, as self-care behaviors can greatly affect symptoms in patients with HF,<sup>42</sup> the  
12  
13 patient's self-caring strategies, perception of autonomy, level of empowerment, and the  
14  
15 perception of past and present experiences with the disease should be taken into  
16  
17 consideration when developing and introducing future PRO instruments.<sup>43</sup> Finally,  
18  
19 additional instruments should be developed to evaluate the key aspects of the patient'  
20  
21 support system, and explore caregivers' needs.  
22  
23

24  
25 Given the lack of studies assessing the patient's and caregiver's perspective on  
26  
27 the HFrEF pathway in Spain, this study aimed to fill this gap to better understand  
28  
29 possible cultural differences. The ethnographic approach, which involved in-depth  
30  
31 interviews with patients at their homes and with their caregivers, made it possible to  
32  
33 collect relevant data not normally discussed or shared in healthcare facilities. Both  
34  
35 patients and caregivers could talk freely and explain the aspects of the disease that  
36  
37 they considered under control and those where change was deemed necessary.  
38  
39 However, a limitation of this study is that the small sample size, although not unusual in  
40  
41 qualitative research that requires extensive and detailed analysis of each patient, may  
42  
43 not fully represent the diversity of people with HFrEF in Spain. Also, as it is the case in  
44  
45 other ethnographic studies, interviewing patients and caregivers together may have  
46  
47 resulted in individual perspectives being altered or withheld. Finally, since this study  
48  
49 was carried out during the COVID-19 pandemic, it is possible that the disruption  
50  
51 imposed by the social restrictions could have some effect in the results described here.  
52  
53

54  
55 In conclusion, this study analyzed, by the use of PROMs and in-depth  
56  
57 interviews, the complexity of the actual experiences of the patients with HFrEF. The  
58  
59 lack of knowledge about the disease generates confusion and anxiety about  
60  
symptoms, and patients could tend to minimize the impact of HF in QoL. Patients tend

1  
2  
3 to maintain a closer relationship with their nurses, compared with the cardiologist,  
4 favoring a more open discussion of feelings and experiences related to the disease  
5 with them. In order to provide personalized care to HF<sub>r</sub>EF patients, QoL could be  
6 assessed by comparing two points in time, thus helping the healthcare practitioner  
7 understand the patient's point of view of specific interventions. Since QoL is a  
8 multidimensional, subjective concept that is affected by a variety of factors, its  
9 evaluation should be carefully designed to capture specific moments and changes in  
10 the trajectory of the disease. The study suggests that tools and training should be  
11 made available to caregivers to alleviate the burden of care and anxiety derived from  
12 uncertainty in the progression of the disease. Further work is needed to fully integrate  
13 the use of well-designed and useful PROMs and PREMs into clinical practice.  
14  
15  
16  
17  
18  
19  
20  
21  
22  
23  
24  
25  
26  
27  
28  
29  
30  
31

### 32 **Acknowledgements**

33 Medical writing assistance was provided by Francisco López de Saro, PhD (Trialance).  
34  
35  
36  
37  
38

### 39 **Contributors**

40 RR, LV, SCC, JCC and BP conceived and designed the study. JCC, EC, EH, ECB,  
41 PGC, NJ, MRM, CE, SY, SJM, LAT, AGM, PMB, LYF, JSC, SVL, and MSG contributed  
42 to patient recruitment and data collection. JCC, JSC, BP, LV, SCC, MFE, and RR  
43 compiled and analyzed the data. JCC, BP, LV, SCC, and RR drafted the manuscript,  
44 which was revised by the other authors. All authors read and approved the final  
45 manuscript.  
46  
47  
48  
49  
50  
51  
52  
53  
54

### 55 **Funding**

56 This work was supported by AstraZeneca España.  
57  
58  
59  
60

### **Competing interests**

JCC received fees from AstraZeneca for the coordination and oversight of the study.

RR, MFE, and SCC received research funding from AstraZeneca. RFdIF, BP, and LV are employees of AstraZeneca. All other authors report no competing interests.

### **Patient and public involvement**

CardioAlianza, a Spanish association of patients with cardiovascular disease and their caregivers, was involved in designing, providing feedback for interpretation of data, and in the dissemination of this research.

### **Patient consent for publication**

Informed consent for participation in the study and publication of the results were obtained from each patient prior to study initiation.

### **Ethics approval**

This study was approved by the Ethics Review Board of the Bellvitge University Hospital on March 12<sup>th</sup>, 2020 with number PR062/20.

### **Data availability statement**

The data that support the findings of this study are available on reasonable request from the corresponding author. The data are not publicly available due to their containing information that could compromise the privacy of research participants.

## REFERENCES

1. Savarese G, Lund LH. Global Public Health Burden of Heart Failure. *Card Fail Rev*. 2017;3(1):7-11. doi:10.15420/cfr.2016:25:2
2. Crespo-Leiro MG, Metra M, Lund LH, et al. Advanced heart failure: a position statement of the Heart Failure Association of the European Society of Cardiology. *Eur J Heart Fail*. 2018;20(11):1505-1535. doi:10.1002/ejhf.1236
3. Hollingworth W, Biswas M, Maishman RL, et al. The healthcare costs of heart failure during the last five years of life: A retrospective cohort study. *Int J Cardiol*. 2016;224:132-138. doi:10.1016/j.ijcard.2016.09.021
4. Agbor VN, Ntusi NAB, Noubiap JJ. An overview of heart failure in low- and middle-income countries. *Cardiovasc Diagn Ther*. 2020;10(2):244-251. doi:10.21037/cdt.2019.08.03
5. Farré N, Vela E, Clèries M, et al. Medical resource use and expenditure in patients with chronic heart failure: a population-based analysis of 88 195 patients. *Eur J Heart Fail*. 2016;18(9):1132-1140. doi:10.1002/ejhf.549
6. Farré N, Vela E, Clèries M, et al. Real world heart failure epidemiology and outcome: A population-based analysis of 88,195 patients. *PLoS One*. 2017;12(2):e0172745. doi:10.1371/journal.pone.0172745
7. Méndez-Bailón M, Jiménez-García R, Hernández-Barrera V, et al. Significant and constant increase in hospitalization due to heart failure in Spain over 15 year period. *Eur J Intern Med*. 2019;64:48-56. doi:10.1016/j.ejim.2019.02.019
8. Ponikowski P, Voors AA, Anker SD, et al. 2016 ESC Guidelines for the diagnosis and treatment of acute and chronic heart failure: The Task Force for the diagnosis and treatment of acute and chronic heart failure of the European Society of Cardiology (ESC) Developed with the special contribution of the Heart Failure Association (HFA) of the ESC. *Eur Heart J*. 2016;37(27):2129-2200. doi:10.1093/eurheartj/ehw128
9. Bhatt AS, Abraham WT, Lindenfeld J, et al. Treatment of HF in an Era of Multiple Therapies: Statement From the HF Collaboratory. *JACC Heart Fail*. 2021;9(1):1-12. doi:10.1016/j.jchf.2020.10.014
10. Upadhyya B, Kitzman DW. Heart failure with preserved ejection fraction: New approaches to diagnosis and management. *Clin Cardiol*. 2020;43(2):145-155. doi:10.1002/clc.23321
11. Criteria Committee, New York Heart Association. *Diseases of the Heart and Blood Vessels. Nomenclature and Criteria for Diagnosis*. 6th ed. Little, Brown; 1964.
12. Fry M, McLachlan S, Purdy S, Sanders T, Kadam UT, Chew-Graham CA. The implications of living with heart failure; the impact on everyday life, family support, co-morbidities and access to healthcare: a secondary qualitative analysis. *BMC Fam Pract*. 2016;17(1):139. doi:10.1186/s12875-016-0537-5
13. Comín-Colet J, Anguita M, Formiga F, et al. Health-related Quality of Life of Patients With Chronic Systolic Heart Failure in Spain: Results of the VIDA-IC



- 1  
2  
3 Study. *Revista Española de Cardiología*. 2016;69(3):256-271.  
4 doi:10.1016/j.recesp.2015.07.034  
5
- 6 14. Green CP, Porter CB, Bresnahan DR, Spertus JA. Development and evaluation of  
7 the Kansas City Cardiomyopathy Questionnaire: a new health status measure for  
8 heart failure. *J Am Coll Cardiol*. 2000;35(5):1245-1255. doi:10.1016/s0735-  
9 1097(00)00531-3  
10
- 11 15. Garin O, Herdman M, Vilagut G, et al. Assessing health-related quality of life in  
12 patients with heart failure: a systematic, standardized comparison of available  
13 measures. *Heart Fail Rev*. 2014;19(3):359-367. doi:10.1007/s10741-013-9394-7  
14
- 15 16. Burns DJP, Arora J, Okunade O, et al. International Consortium for Health  
16 Outcomes Measurement (ICHOM): Standardized Patient-Centered Outcomes  
17 Measurement Set for Heart Failure Patients. *JACC: Heart Failure*. 2020;8(3):212-  
18 222. doi:10.1016/j.jchf.2019.09.007  
19
- 20 17. Kelkar AA, Spertus J, Pang P, et al. Utility of Patient-Reported Outcome  
21 Instruments in Heart Failure. *JACC Heart Fail*. 2016;4(3):165-175.  
22 doi:10.1016/j.jchf.2015.10.015  
23
- 24 18. Rumsfeld JS, Alexander KP, Goff DC, et al. Cardiovascular health: the importance  
25 of measuring patient-reported health status: a scientific statement from the  
26 American Heart Association. *Circulation*. 2013;127(22):2233-2249.  
27 doi:10.1161/CIR.0b013e3182949a2e  
28
- 29 19. Psozka MA, von Maltzahn R, Anatchkova M, et al. Patient-Reported Outcomes in  
30 Chronic Heart Failure: Applicability for Regulatory Approval. *JACC Heart Fail*.  
31 2016;4(10):791-804. doi:10.1016/j.jchf.2016.04.010  
32
- 33 20. Nieminen MS, Dickstein K, Fonseca C, et al. The patient perspective: Quality of life  
34 in advanced heart failure with frequent hospitalisations. *International Journal of*  
35 *Cardiology*. 2015;191:256-264. doi:10.1016/j.ijcard.2015.04.235  
36
- 37 21. Lagha E, Noble A, Smith A, Denvir MA, Leslie SJ. Patient Reported Experience  
38 Measures (PREMs) in chronic heart failure. *J R Coll Physicians Edinb*.  
39 2012;42(4):301-305. doi:10.4997/JRCPE.2012.404  
40
- 41 22. Pennucci F, De Rosis S, Passino C. Piloting a web-based systematic collection and  
42 reporting of patient-reported outcome measures and patient-reported experience  
43 measures in chronic heart failure. *BMJ Open*. 2020;10(10):e037754.  
44 doi:10.1136/bmjopen-2020-037754  
45
- 46 23. Heo S, Lennie TA, Okoli C, Moser DK. Quality of life in patients with heart failure:  
47 ask the patients. *Heart Lung*. 2009;38(2):100-108. doi:10.1016/j.hrtlng.2008.04.002  
48
- 49 24. Gwaltney. Hearing the voice of the heart failure patient: key experiences identified  
50 in qualitative interviews. *Br J Cardiol*. 2012;19(1). doi:10.5837/bjc.2012.004  
51
- 52 25. Etemadifar S, Bahrami M, Shahriari M, Farsani AK. Family caregivers' experiences  
53 of caring for patients with heart failure: a descriptive, exploratory qualitative study. *J*  
54 *Nurs Res*. 2015;23(2):153-161. doi:10.1097/JNR.0000000000000076  
55
- 56 26. Grant JS, Graven LJ. Problems experienced by informal caregivers of individuals  
57 with heart failure: An integrative review. *Int J Nurs Stud*. 2018;80:41-66.  
58 doi:10.1016/j.ijnurstu.2017.12.016  
59  
60

- 1  
2  
3 27. Bjornsdottir K, Ketilsdottir A, Gudnadottir M, Kristinsdottir IV, Ingadottir B.  
4 Integration of nursing services provided to patients with heart failure living at home:  
5 A longitudinal ethnographic study. *J Clin Nurs*. Published online January 12, 2021.  
6 doi:10.1111/jocn.15658  
7
- 8 28. Kim EY, Oh S, Son Y-J. Caring experiences of family caregivers of patients with  
9 heart failure: A meta-ethnographic review of the past 10 years. *Eur J Cardiovasc*  
10 *Nurs*. 2020;19(6):473-485. doi:10.1177/1474515120915040  
11
- 12 29. Simmonds R, Glogowska M, McLachlan S, et al. Unplanned admissions and the  
13 organisational management of heart failure: a multicentre ethnographic, qualitative  
14 study. *BMJ Open*. 2015;5(10):e007522. doi:10.1136/bmjopen-2014-007522  
15
- 16 30. Glogowska M, Simmonds R, McLachlan S, et al. Managing patients with heart  
17 failure: a qualitative study of multidisciplinary teams with specialist heart failure  
18 nurses. *Ann Fam Med*. 2015;13(5):466-471. doi:10.1370/afm.1845  
19
- 20 31. Glogowska M, Simmonds R, McLachlan S, et al. "Sometimes we can't fix things": a  
21 qualitative study of health care professionals' perceptions of end of life care for  
22 patients with heart failure. *BMC Palliat Care*. 2016;15:3. doi:10.1186/s12904-016-  
23 0074-y  
24
- 25 32. Herdman M, Gudex C, Lloyd A, et al. Development and preliminary testing of the  
26 new five-level version of EQ-5D (EQ-5D-5L). *Qual Life Res*. 2011;20(10):1727-  
27 1736. doi:10.1007/s11136-011-9903-x  
28
- 29 33. Hernandez G, Garin O, Pardo Y, et al. Validity of the EQ-5D-5L and reference  
30 norms for the Spanish population. *Qual Life Res*. 2018;27(9):2337-2348.  
31 doi:10.1007/s11136-018-1877-5  
32
- 33 34. Comín-Colet J, Garin O, Lupón J, et al. Validación de la versión española del  
34 Kansas City Cardiomyopathy Questionnaire. *Revista Española de Cardiología*.  
35 2011;64(1):51-58. doi:10.1016/j.recesp.2010.10.003  
36
- 37 35. Wingham J, Frost J, Britten N. Behind the smile: qualitative study of caregivers'  
38 anguish and management responses while caring for someone living with heart  
39 failure. *BMJ Open*. 2017;7(7):e014126. doi:10.1136/bmjopen-2016-014126  
40
- 41 36. Östman M, Bäck-Pettersson S, Sandvik A-H, Sundler AJ. "Being in good hands":  
42 next of kin's perceptions of continuity of care in patients with heart failure. *BMC*  
43 *Geriatr*. 2019;19(1):375. doi:10.1186/s12877-019-1390-x  
44
- 45 37. Al-Rawashdeh S, Ashour A, Alshraifeen A, Rababa M. Experiences on Providing  
46 Home Care for A Relative with Heart Failure: A Qualitative Study. *J Community*  
47 *Health Nurs*. 2020;37(3):129-140. doi:10.1080/07370016.2020.1780043  
48
- 49 38. Barnes S, Whittingham K. Informal carers' experiences of caring for a person with  
50 heart failure in a community setting. *Health Soc Care Community*. 2020;28(3):883-  
51 890. doi:10.1111/hsc.12919  
52
- 53 39. Wingham J, Frost J, Britten N, et al. Caregiver outcomes of the REACH-HF  
54 multicentre randomized controlled trial of home-based rehabilitation for heart failure  
55 with reduced ejection fraction. *Eur J Cardiovasc Nurs*. 2019;18(7):611-620.  
56 doi:10.1177/1474515119850011  
57  
58  
59  
60

- 1  
2  
3 40. Riegel B, Hanlon AL, Coe NB, et al. Health coaching to improve self-care of  
4 informal caregivers of adults with chronic heart failure - iCare4Me: Study protocol  
5 for a randomized controlled trial. *Contemp Clin Trials*. 2019;85:105845.  
6 doi:10.1016/j.cct.2019.105845  
7
- 8 41. Hirschman KB, Bowles KH, Garcia-Gonzalez L, et al. Lessons learned from the  
9 implementation of a video health coaching technology intervention to improve self-  
10 care of family caregivers of adults with heart failure. *Res Nurs Health*.  
11 2021;44(1):250-259. doi:10.1002/nur.22100  
12
- 13 42. Auld JP, Mudd JO, Gelow JM, Hiatt SO, Lee CS. Self-care Moderates the  
14 Relationship Between Symptoms and Health-Related Quality of Life in Heart  
15 Failure. *J Cardiovasc Nurs*. 2018;33(3):217-224.  
16 doi:10.1097/JCN.0000000000000447  
17
- 18 43. Sedlar N, Lainscak M, Mårtensson J, Strömberg A, Jaarsma T, Farkas J. Factors  
19 related to self-care behaviours in heart failure: A systematic review of European  
20 Heart Failure Self-Care Behaviour Scale studies. *Eur J Cardiovasc Nurs*.  
21 2017;16(4):272-282. doi:10.1177/1474515117691644  
22  
23  
24  
25  
26  
27  
28  
29  
30  
31  
32  
33  
34  
35  
36  
37  
38  
39  
40  
41  
42  
43  
44  
45  
46  
47  
48  
49  
50  
51  
52  
53  
54  
55  
56  
57  
58  
59  
60

1  
2  
3 **TABLES**  
4  
5  
6  
7  
8  
9  
10  
11  
12  
13  
14

15 **Table 1.** Demographic and clinical characteristics of the patients.  
16

| Variable                                     | N=20        |
|----------------------------------------------|-------------|
| Age, years, mean (SD)                        | 72.5 (11.4) |
| Range (minimum-maximum)                      | 38-85       |
| Gender, male, N (%)                          | 13 (65.0)   |
| Time since diagnosis, years, mean (SD)       | 2.35 (2.9)  |
| Recent diagnosis (less than 2 months), N (%) | 2 (10.0)    |
| NYHA, N (%)                                  |             |
| I                                            | 4 (20.0)    |
| II                                           | 7 (35.0)    |
| III                                          | 9 (45.0)    |
| LVEF, %, mean (SD)                           | 31.1 (6.0)  |
| Diabetes, type 2, N (%)                      | 9 (45.0)    |

17  
18  
19  
20  
21  
22  
23  
24  
25  
26  
27  
28  
29  
30  
31  
32 *LVEF, left ventricular ejection fraction; NYHA, New York Heart Association; SD, standard*  
33 *deviation.*  
34  
35  
36  
37  
38  
39  
40  
41  
42  
43  
44  
45  
46  
47  
48  
49  
50  
51  
52  
53  
54  
55  
56  
57  
58  
59  
60

**Table 2.** Evaluation of health status by PROMs. Scores for EQ-5D-5L and KCCQ.

|                                                                                 | NYHA I-II<br>(N=11) | NYHA III<br>(N=9) | All NYHA<br>(N=20) |
|---------------------------------------------------------------------------------|---------------------|-------------------|--------------------|
| EQ-5D-5L, patients reporting any limitation <sup>1</sup> , N (%)                |                     |                   |                    |
| Mobility                                                                        | 5 (40.5)            | 9 (100)           | 14 (70.0)          |
| Self-care                                                                       | 0                   | 7 (77.8)          | 7 (35.0)           |
| Usual activities                                                                | 4 (36.4)            | 8 (88.9)          | 12 (60.0)          |
| Pain/Discomfort                                                                 | 4 (36.4)            | 6 (66.7)          | 10 (50.0)          |
| Anxiety/Depression                                                              | 4 (36.4)            | 8 (88.9)          | 12 (60.0)          |
| EQ-5D-5L, patients reporting severe or extreme limitations <sup>2</sup> , N (%) |                     |                   |                    |
| Mobility                                                                        | 0                   | 5 (55.6)          | 5 (25.0)           |
| Self-care                                                                       | 0                   | 2 (22.2)          | 2 (10.0)           |
| Usual activities                                                                | 0                   | 3 (33.3)          | 3 (15.0)           |
| Pain/Discomfort                                                                 | 1 (9.1)             | 2 (22.2)          | 3 (15.0)           |
| Anxiety/Depression                                                              | 0                   | 2 (22.2)          | 2 (10.0)           |
| EQ-5D-5L global, mean (SD)                                                      |                     |                   |                    |
| Index value                                                                     | 0.85 (0.17)         | 0.37 (0.36)       | 0.64 (0.36)        |
| VAS score                                                                       | 74.55 (23.50)       | 45.56 (14.46)     | 61.50 (24.45)      |
| KCCQ, mean (SD)                                                                 |                     |                   |                    |
| Physical limitation                                                             | 81.06 (19.04)       | 39.72 (26.59)     | 62.46 (30.56)      |
| Symptom stability                                                               | 59.10 (12.61)       | 66.67 (30.62)     | 62.50 (22.21)      |
| Symptom frequency                                                               | 84.66 (17.14)       | 57.64 (27.14)     | 72.50 (25.59)      |
| Symptom burden                                                                  | 91.67 (11.18)       | 61.11 (24.30)     | 77.92 (23.61)      |
| Self-efficacy                                                                   | 94.32 (10.25)       | 85.94 (18.22)     | 90.79 (14.34)      |
| Quality of life                                                                 | 82.58 (13.15)       | 33.33 (20.83)     | 60.42 (30.09)      |
| Social limitation                                                               | 85.61 (14.02)       | 31.94 (26.62)     | 61.46 (33.94)      |
| KCCQ global scores, mean (SD)                                                   |                     |                   |                    |
| Overall summary                                                                 | 82.69 (9.81)        | 41.09 (20.55)     | 63.97 (26.06)      |
| Clinical summary                                                                | 81.30 (10.82)       | 49.55 (22.31)     | 67.01 (23.10)      |
| Total symptom                                                                   | 81.54 (10.85)       | 59.37 (23.50)     | 71.56 (20.55)      |

<sup>1</sup>Any score but 1 (no problems).

<sup>2</sup> Only patients scoring 4 or 5 in each domain.

EQ-5D-5L, EuroQoL 5D-5L questionnaire; KCCQ, Kansas City Cardiomyopathy Questionnaire; NYHA, New York Heart Association; PRO, patient-reported outcome; SD, standard deviation; VAS, visual analogue scale.

**Table 3.** Domains and main perceptions among HFrEF patients.

| Domains                                                  | Patients and caregivers' quotes                                                                                                                                                                                                                                                                                                                                                                                                                                                                                                                                 |
|----------------------------------------------------------|-----------------------------------------------------------------------------------------------------------------------------------------------------------------------------------------------------------------------------------------------------------------------------------------------------------------------------------------------------------------------------------------------------------------------------------------------------------------------------------------------------------------------------------------------------------------|
| <b>Domain 1. Meanings related to QoL</b>                 |                                                                                                                                                                                                                                                                                                                                                                                                                                                                                                                                                                 |
| <i>Attachment to previous routines</i>                   | <p>"This has split my old age in two, having many things to do and not being able to do them because you get very tired. I miss that freedom that I had. Now I feel tied." [1-1]</p> <p>"What I have missed the most is driving, I spent 20 years as a taxi driver." [2-1]</p> <p>"For me quality of life means to go wherever you want, to do strange things." [2-4]</p> <p>"I have always solved the problems that arised, but now I feel impotence because I can't do this anymore." [2-8]</p>                                                               |
| <i>Fears of progression</i>                              | <p>"The symptoms depend on the day, they are not permanent, some days you are tired, others not." [2-2]</p> <p>"Before I went out to the country with my dog, and I liked to go out with the bike but I can't anymore, I have to depend on a cane." [2-4]</p> <p>"I was in a good, well-paid job and I liked it, but when this happened, I completely disconnected." [2-8]</p>                                                                                                                                                                                  |
| <i>Impact of demographic factors</i>                     | <p>"It has been tough. Especially emotionally when you listen to the doctor who gives you a serious diagnosis and you do not know what you are facing, you think what my life expectancy will be or how you are going to live from now on. This news is not the same for an 86-year-old than for a 38-year-old." [2-6, 38-year-old woman]</p> <p>"They have always been clear about what is happening to me, the question is why, since I am not a patient with a family history of disease." [2-5, female, age 62 years]</p>                                   |
| <b>Domain 2. Caregivers' roles</b>                       |                                                                                                                                                                                                                                                                                                                                                                                                                                                                                                                                                                 |
| <i>Tracking at home</i>                                  | "I keep track of pressure, weight, urine. Every day. I have it written down here in the notebook and I also send it through the hospital's APP. But I really don't know if it is of much use. When I had to call the ambulance everything seemed normal, I kept a similar record in recent days." [caregiver of 78-year-old, NYHA III patient 1-6]                                                                                                                                                                                                              |
| <i>Medical appointments</i>                              | "When we go to the hospital the doctors ask him if he sleeps well or if he is drowning and he always answers that he is fine, but he is not. The last time he had been sleeping on the couch because he couldn't sleep in bed even with 3 pillows. That's why I always go to the controls with him." [caregiver of 74-year-old NYHA III patient 2-4]                                                                                                                                                                                                            |
| <b>Domain 3. Relationships with healthcare providers</b> |                                                                                                                                                                                                                                                                                                                                                                                                                                                                                                                                                                 |
| <i>Commitment</i>                                        | "I come to the very dedicated medical consultations and with the certainty that I am more closely watched than a Ferrari" [2-5, female, age 62 years]                                                                                                                                                                                                                                                                                                                                                                                                           |
| <i>Trustworthiness</i>                                   | <p>"I sit in a consultation where they take their time, and they answer all my doubts. The big difference is that now I feel more secure, I know that I must deal with weight, urine, food. Having the possibility of calling them 24 hours a day gives you more peace of mind." [2-6, female, age 38 years]</p> <p>"The nurse is better than any cardiologist, everyone loves her." [2-5, female, age 62 years]</p> <p>"The nurse is very close, I think they have chosen a person with a character and attitude that is just what a patient needs." [2-6]</p> |

# BMJ Open

## Quality of life and disease experience in patients with heart failure with reduced ejection fraction in Spain: a mixed methods approach to go beyond standardized data

|                               |                                                                                                                                                                                                                                                                                                                                                                                                                                                                                                                                                                                                                                                                                                                                                                                                                                                                                                                                                                                                                                                                                                                                                                                                                                                                                                                                                                                                                                                                                                                                                                                                                                                                                                                                                                                                                                                                                                                                                                                                                                                                                                                                                                                                                                                                                                                                                                                                                       |
|-------------------------------|-----------------------------------------------------------------------------------------------------------------------------------------------------------------------------------------------------------------------------------------------------------------------------------------------------------------------------------------------------------------------------------------------------------------------------------------------------------------------------------------------------------------------------------------------------------------------------------------------------------------------------------------------------------------------------------------------------------------------------------------------------------------------------------------------------------------------------------------------------------------------------------------------------------------------------------------------------------------------------------------------------------------------------------------------------------------------------------------------------------------------------------------------------------------------------------------------------------------------------------------------------------------------------------------------------------------------------------------------------------------------------------------------------------------------------------------------------------------------------------------------------------------------------------------------------------------------------------------------------------------------------------------------------------------------------------------------------------------------------------------------------------------------------------------------------------------------------------------------------------------------------------------------------------------------------------------------------------------------------------------------------------------------------------------------------------------------------------------------------------------------------------------------------------------------------------------------------------------------------------------------------------------------------------------------------------------------------------------------------------------------------------------------------------------------|
| Journal:                      | <i>BMJ Open</i>                                                                                                                                                                                                                                                                                                                                                                                                                                                                                                                                                                                                                                                                                                                                                                                                                                                                                                                                                                                                                                                                                                                                                                                                                                                                                                                                                                                                                                                                                                                                                                                                                                                                                                                                                                                                                                                                                                                                                                                                                                                                                                                                                                                                                                                                                                                                                                                                       |
| Manuscript ID                 | bmjopen-2021-053216.R1                                                                                                                                                                                                                                                                                                                                                                                                                                                                                                                                                                                                                                                                                                                                                                                                                                                                                                                                                                                                                                                                                                                                                                                                                                                                                                                                                                                                                                                                                                                                                                                                                                                                                                                                                                                                                                                                                                                                                                                                                                                                                                                                                                                                                                                                                                                                                                                                |
| Article Type:                 | Original research                                                                                                                                                                                                                                                                                                                                                                                                                                                                                                                                                                                                                                                                                                                                                                                                                                                                                                                                                                                                                                                                                                                                                                                                                                                                                                                                                                                                                                                                                                                                                                                                                                                                                                                                                                                                                                                                                                                                                                                                                                                                                                                                                                                                                                                                                                                                                                                                     |
| Date Submitted by the Author: | 12-Oct-2021                                                                                                                                                                                                                                                                                                                                                                                                                                                                                                                                                                                                                                                                                                                                                                                                                                                                                                                                                                                                                                                                                                                                                                                                                                                                                                                                                                                                                                                                                                                                                                                                                                                                                                                                                                                                                                                                                                                                                                                                                                                                                                                                                                                                                                                                                                                                                                                                           |
| Complete List of Authors:     | <p>Rubio, Raül; A Piece of Pie SL<br/> Palacios, Beatriz; AstraZeneca Farmaceutica Spain SA, Medical<br/> Varela, Luis; AstraZeneca Farmaceutica Spain SA, Medical<br/> Fernández de la Fundación, Raquel; AstraZeneca Farmaceutica Spain SA, Medical<br/> Camargo Correa, Selene; A Piece of Pie SL<br/> Estupiñan, María Fernanda; A Piece of Pie SL<br/> Calvo, Elena; Bellvitge University Hospital, Cardiology and Heart Failure Program; Bellvitge Institute for Biomedical Research, BIO-HEART Cardiovascular Diseases Research Group<br/> José, Nuria; Bellvitge University Hospital, Cardiology and Heart Failure Program; Bellvitge Institute for Biomedical Research, BIO-HEART Cardiovascular Diseases Research Group<br/> Ruiz Muñoz, Marta; Bellvitge University Hospital, Cardiology and Heart Failure Program; Bellvitge Institute for Biomedical Research, BIO-HEART Cardiovascular Diseases Research Group<br/> Yun, Sergi; Bellvitge University Hospital, Cardiology and Heart Failure Program; Bellvitge Institute for Biomedical Research, BIO-HEART Cardiovascular Diseases Research Group<br/> Jiménez-Marrero, Santiago; Bellvitge University Hospital, Cardiology and Heart Failure Program; Bellvitge Institute for Biomedical Research, BIO-HEART Cardiovascular Diseases Research Group<br/> Alcoberro, Lidia; Bellvitge University Hospital, Cardiology and Heart Failure Program; Bellvitge Institute for Biomedical Research, BIO-HEART Cardiovascular Diseases Research Group<br/> Garay, Alberto; Bellvitge University Hospital, Cardiology and Heart Failure Program; Bellvitge University Hospital, Cardio-Oncology Unit<br/> Moliner, Pedro; Bellvitge University Hospital, Cardiology and Heart Failure Program; Bellvitge University Hospital, Cardio-Oncology Unit<br/> Sánchez-Fernández, Lydia; Bellvitge University Hospital, Cardiology and Heart Failure Program; Bellvitge University Hospital, Cardio-Oncology Unit<br/> Soria Gómez, María Teresa; Puerta de Hierro University Hospital of Majadahonda, Heart Failure Unit<br/> Hidalgo, Encarna; Bellvitge University Hospital, Cardiology and Heart Failure Program; Bellvitge Institute for Biomedical Research, BIO-HEART Cardiovascular Diseases Research Group<br/> Enjuanes, C; Bellvitge University Hospital, Cardiology and Heart Failure Program; Bellvitge Institute for Biomedical Research, BIO-HEART</p> |



|                                    |                                                                                                                                                                                                                                                                                                                                                                                                                                                                                                                                                                                                                                                                                                                                                                                                                                                                                                             |
|------------------------------------|-------------------------------------------------------------------------------------------------------------------------------------------------------------------------------------------------------------------------------------------------------------------------------------------------------------------------------------------------------------------------------------------------------------------------------------------------------------------------------------------------------------------------------------------------------------------------------------------------------------------------------------------------------------------------------------------------------------------------------------------------------------------------------------------------------------------------------------------------------------------------------------------------------------|
|                                    | Cardiovascular Diseases Research Group<br>Calero-Molina, Esther; Bellvitge University Hospital, Cardiology and Heart Failure Program; Bellvitge Institute for Biomedical Research, BIO-HEART Cardiovascular Diseases Research Group<br>Rueda, Yolanda; CardioAlianza<br>San Saturnino, Maite; CardioAlianza<br>Garcimartín, Paloma; Hospital del Mar, Outpatients Clinics; Hospital del Mar Institute for Medical Research, Biomedical Research in Heart Diseases<br>López-Ibor, Jorge; Puerta de Hierro University Hospital of Majadahonda, Cardiology<br>Segovia-Cubero, Javier; Puerta de Hierro University Hospital of Majadahonda, Cardiology; Carlos III Health Institute, CIBER of Cardiovascular Diseases<br>Comin-Colet, Josep; Bellvitge University Hospital, Cardiology and Heart Failure Program; Bellvitge Institute for Biomedical Research, BIO-HEART Cardiovascular Diseases Research Group |
| <b>Primary Subject Heading</b> :   | Qualitative research                                                                                                                                                                                                                                                                                                                                                                                                                                                                                                                                                                                                                                                                                                                                                                                                                                                                                        |
| <b>Secondary Subject Heading</b> : | Research methods, Cardiovascular medicine                                                                                                                                                                                                                                                                                                                                                                                                                                                                                                                                                                                                                                                                                                                                                                                                                                                                   |
| <b>Keywords</b> :                  | Heart failure < CARDIOLOGY, Quality in health care < HEALTH SERVICES ADMINISTRATION & MANAGEMENT, QUALITATIVE RESEARCH                                                                                                                                                                                                                                                                                                                                                                                                                                                                                                                                                                                                                                                                                                                                                                                      |
|                                    |                                                                                                                                                                                                                                                                                                                                                                                                                                                                                                                                                                                                                                                                                                                                                                                                                                                                                                             |

SCHOLARONE™  
Manuscripts





I, the Submitting Author has the right to grant and does grant on behalf of all authors of the Work (as defined in the below author licence), an exclusive licence and/or a non-exclusive licence for contributions from authors who are: i) UK Crown employees; ii) where BMJ has agreed a CC-BY licence shall apply, and/or iii) in accordance with the terms applicable for US Federal Government officers or employees acting as part of their official duties; on a worldwide, perpetual, irrevocable, royalty-free basis to BMJ Publishing Group Ltd ("BMJ") its licensees and where the relevant Journal is co-owned by BMJ to the co-owners of the Journal, to publish the Work in this journal and any other BMJ products and to exploit all rights, as set out in our [licence](#).

The Submitting Author accepts and understands that any supply made under these terms is made by BMJ to the Submitting Author unless you are acting as an employee on behalf of your employer or a postgraduate student of an affiliated institution which is paying any applicable article publishing charge ("APC") for Open Access articles. Where the Submitting Author wishes to make the Work available on an Open Access basis (and intends to pay the relevant APC), the terms of reuse of such Open Access shall be governed by a Creative Commons licence – details of these licences and which [Creative Commons](#) licence will apply to this Work are set out in our licence referred to above.

Other than as permitted in any relevant BMJ Author's Self Archiving Policies, I confirm this Work has not been accepted for publication elsewhere, is not being considered for publication elsewhere and does not duplicate material already published. I confirm all authors consent to publication of this Work and authorise the granting of this licence.

1  
2  
3 1 *Original research*  
4 2  
5 3  
6  
7 4

8  
9 5 **Quality of life and disease experience in patients with**  
10  
11 6 **heart failure with reduced ejection fraction in Spain: a**  
12  
13  
14 7 **mixed methods approach to go beyond standardized**  
15  
16  
17 8 **data**  
18  
19  
20  
21 9

22  
23 10 Raúl Rubio,<sup>1</sup> Beatriz Palacios,<sup>2</sup> Luis Varela,<sup>2</sup> Raquel Fernández de la Fundación,<sup>2</sup>  
24  
25 11 Selene Camargo Correa,<sup>1</sup> María Fernanda Estupiñan,<sup>1</sup> Elena Calvo,<sup>3,4</sup> Nuria José,<sup>3,4</sup>  
26  
27 12 Marta Ruiz Muñoz,<sup>3,4</sup> Sergi Yun,<sup>3,4</sup> Santiago Jiménez-Marrero,<sup>3,4</sup> Lidia Alcoberro<sup>3,4</sup>  
28  
29 13 Alberto Garay,<sup>3,5</sup> Pedro Moliner,<sup>3,5</sup> Lydia Sánchez-Fernández,<sup>3,5</sup> María Teresa Soria  
30  
31 14 Gómez,<sup>6</sup> Encarna Hidalgo,<sup>3,4</sup> Cristina Enjuanes,<sup>3,4</sup> Esther Calero-Molina,<sup>3,4</sup> Yolanda  
32  
33 15 Rueda,<sup>7</sup> Maite San Saturnino,<sup>7</sup> Paloma Garcimartín,<sup>8,9</sup> Jorge V. López-Ibor,<sup>10</sup> Javier  
34  
35 16 Segovia-Cubero,<sup>11,12</sup> Josep Comin-Colet<sup>3,4,13</sup>  
36  
37  
38

39 18 1. A Piece of Pie SL, Barcelona, Spain

40 19 2. Medical Department, AstraZeneca Farmacéutica Spain SA, Madrid, Spain

41  
42  
43 20 3. Cardiology Department and Heart Failure Program, Bellvitge University Hospital,  
44  
45 Hospitalet de Llobregat, Barcelona, Spain

46  
47  
48 22 4. BIO-HEART Cardiovascular Diseases Research Group, Bellvitge Biomedical  
49  
50 23 Research Institute (IDIBELL), Hospitalet de Llobregat, Barcelona, Spain

51  
52 24 5. Cardio-Oncology Unit, Bellvitge University Hospital, Catalan Institute of Oncology,  
53  
54 25 L'Hospitalet de Llobregat, Spain

55  
56 26 6. Heart Failure Unit, Puerta de Hierro University Hospital, Majadahonda, Madrid,  
57  
58 27 Spain  
59  
60

- 1  
2  
3 28 7. CardioAlianza, Barcelona, Spain  
4  
5 29 8. Outpatient Clinics, Hospital del Mar, Parc de Salut Mar, Barcelona, Spain  
6  
7 30 9. Biomedical Research in Heart Diseases, Hospital del Mar, Medical Research  
8  
9 31 Institute (IMIM), Barcelona, Spain  
10  
11 32 10. Outpatient Heart Failure Clinic, Department of Cardiology, Puerta de Hierro  
12  
13 33 University Hospital, Majadahonda, Madrid, Spain  
14  
15 34 11. Department of Cardiology, Puerta de Hierro University Hospital, Majadahonda,  
16  
17 35 Madrid, Spain  
18  
19 36 12. CIBER of Cardiovascular Diseases, Carlos III Institute, Madrid, Spain  
20  
21 37 13. Department of Clinical Sciences, School of Medicine, University of Barcelona,  
22  
23 38 Barcelona, Spain  
24  
25  
26  
27  
28  
29  
30  
31  
32  
33  
34  
35  
36  
37  
38  
39  
40

41 Correspondence to: Dr. Josep Comin-Colet, Department of Cardiology and Heart  
42 Failure Program, Bellvitge University Hospital, 08907 L'Hospitalet de Llobregat,  
43 Barcelona, Spain

44  
45 Email: josepcomin@gmail.com  
46  
47  
48  
49  
50

51 Word count: 4,140  
52  
53  
54  
55  
56  
57  
58  
59  
60

1  
2  
3 54 **ABSTRACT**  
4  
5 55  
6

7 56 **Objectives:** To gather insights on the disease experience of patients with heart failure  
8 with reduced ejection fraction (HFrEF), and assess how patients' experiences and  
9 57 narratives related to the disease complement data collected through standardized  
10 58 narratives related to the disease complement data collected through standardized  
11 59 patient-reported outcome measures (PROMs). Also, to explore new ways of evaluating  
12 60 the burden experienced by patients and caregivers.

13 61 **Design:** Observational, descriptive, multicenter, cross-sectional, qualitative study.

14 62 **Setting:** Secondary care, patient's homes.

15 63 **Participants:** Twenty patients with HFrEF (NYHAs I-III) aged 38-85 years.

16 64 **Measures:** PROMs EuroQoL 5D-5L and Kansas City Cardiomyopathy Questionnaire  
17 65 and patient interview and observation.

18 66 **Results:** A total of 20 patients with HFrEF participated in the study. The patients' mean  
19 67 (SD) age was 72.5 (11.4) years, 65% were male, and were classified in NYHA  
20 68 functional classes I (N=4), II (N=7) and III (N=9). The study showed a strong impact of  
21 69 HF in the patients' quality of life (QoL) and disease experience, as revealed by the  
22 70 standardized PROMs (EQ-5D-5L global index=0.64 [0.36]; KCCQ total symptom  
23 71 score=71.56 [20.55]) and the in-depth interviews. Patients and caregivers often  
24 72 disagreed describing and evaluating perceived QoL, as patients downplayed their  
25 73 limitations and caregivers overemphasized the poor QoL of the patients. Patients  
26 74 related current QoL to distant life experiences or to critical moments in their disease,  
27 75 such as hospitalizations. Anxiety over the disease progression is apparent in both  
28 76 patients and caregivers, suggesting that caregiver-specific tools should be developed.

29 77 **Conclusions:** PROMs are an effective way of assessing symptoms over the most  
30 78 recent time period. However, especially in chronic diseases such as HFrEF, PROM  
31 79 scores could be complemented with additional tools to gain a better understanding of  
32 80 the patient's status. New PROMs designed to evaluate and compare specific points in  
33 81 the life of the patient could be clinically more useful to assess changes in health status.

1  
2  
3 82  
4  
5 83  
6  
7 84  
8  
9 85  
10  
11 86  
12  
13 87  
14  
15 88  
16  
17 89  
18  
19 90  
20  
21 91  
22  
23 92  
24  
25 93  
26  
27 94  
28  
29 95  
30  
31 96  
32  
33 97  
34  
35 98  
36  
37 99  
38  
39 100  
40  
41 101  
42  
43  
44  
45  
46  
47  
48  
49  
50  
51  
52  
53  
54  
55  
56  
57  
58  
59  
60

### **Strengths and limitations of this study**

- This study followed an ethnographic approach to collect data on patient's experiences and narratives related to heart failure, a type of study not before carried out in Spain and with scarce reports worldwide.
- Both patients and caregivers could discuss freely and explain in detail the aspects of the disease that they considered under control and those where change was deemed necessary.
- The often-contrasting views of patients and caregivers highlighted the difficulties in obtaining accurate and objective evaluations of quality of life.
- Although the selection of patients aimed for inclusiveness and diversity, the limited number of HF<sub>r</sub>EF patients selected for in-depth analysis may not be fully representative of the population of HF<sub>r</sub>EF patients in Spain.
- The ethnographic interviews took place in the context of the COVID-19 pandemic, which transformed the daily routines of patients and caregivers and may have to a certain extent altered their perspective of living with HF<sub>r</sub>EF.

## 102 INTRODUCTION

103  
104 Despite advances in treatment, heart failure (HF) remains one of the leading causes of  
105 hospitalization and readmissions, death and disability worldwide.<sup>1,2</sup> The economic  
106 burden of HF, mainly driven by recurrent hospitalizations, consumes an estimated 1-  
107 2% of healthcare budgets.<sup>3,4</sup> The progressive aging of the population in some Western  
108 countries, such as Spain, and increasing HF prevalence, have positioned this disease  
109 as a major public health problem.<sup>5-7</sup>

110 Clinically, HF can be classified based on the left ventricular ejection fraction  
111 (LVEF) into HF with reduced ejection fraction (HFrEF), defined as an EF  $\leq 40\%$ , mildly-  
112 reduced ejection fraction (HFmrEF), defined as EF  $>40\%$  and  $<50\%$ , and HF with  
113 preserved ejection fraction (HFpEF), defined as an ejection fraction  $\geq 50\%$ .<sup>8</sup> Patients in  
114 these subgroups often have distinct underlying etiologies, demographics, co-  
115 morbidities and response to therapies.<sup>9,10</sup> Additionally, the presence and severity of  
116 symptoms and exercise intolerance of patients with HF is usually categorized following  
117 the New York Heart Association (NYHA) classification into four functional classes (I-IV),  
118 being class IV the worst.<sup>11</sup>

119 HF can severely affect the quality of life (QoL) of the patient by reducing their  
120 independence and ability to undertake daily living activities, and can also disturb their  
121 mental health and psychosocial well-being.<sup>12,13</sup> Prior studies have shown that patients  
122 with HF had an even higher incidence of limitations than patients with chronic diseases  
123 such as diabetes, cancer, or Alzheimer's disease.<sup>13</sup> Several patient-reported outcome  
124 measures (PROMs) have been used to quantify health status in patients with HF, such  
125 as the generic EuroQoL 5D-5L (EQ-5D-5L) and the disease-specific Kansas City  
126 Cardiomyopathy Questionnaire (KCCQ).<sup>13-17</sup> PROMs such as the KCCQ have a good  
127 correlation with prognosis and their use has been encouraged by the American Heart  
128 Association in both routine clinical practice and clinical trials of new therapies.<sup>18,19</sup>  
129 However, although these PROMs can be useful indicators of health status and how HF

1  
2  
3 130 impacts patients' QoL within a 2-week recall period, they have not been designed to  
4  
5 131 reflect some of the patient's and caregiver's perspectives on living with HF, including  
6  
7 132 aspects such as the importance of interactions with family or healthcare providers,  
8  
9 133 feelings related to the course of their disease, or barriers to accessing healthcare  
10  
11 134 resources.<sup>20</sup> These unique aspects of culture, preferences, customs, values and  
12  
13 135 attitudes, could have an impact on treatment effectiveness and outcomes.  
14  
15 136 Complementary to PROMs, in-depth interviews with patients and caregivers are useful  
16  
17 137 to evaluate quality of patient care and the interaction between the patient and the  
18  
19 138 healthcare system.<sup>21</sup> However, neglecting the limitations PROMs could hinder our  
20  
21 139 understanding of the patient's attitudes and real-life disease experiences.  
22  
23

24 140 Ethnographic qualitative studies involve observation of the patients and  
25  
26 141 caregivers in their real-world settings to determine how they behave in specific  
27  
28 142 contexts. Ethnographic research collects comprehensive information from multiple  
29  
30 143 sources such as interviews, caregiver perspectives, non-participant observation of  
31  
32 144 healthcare visits and home tours, among others, and has previously been carried out to  
33  
34 145 investigate QoL in patients with HF.<sup>12,22-27</sup> Previous ethnographic studies conducted in  
35  
36 146 patients from the United Kingdom identified barriers to interventions for HF and critical  
37  
38 147 points on disease pathways which resulted in an increase in the risk of admission.<sup>28-30</sup>  
39  
40

41 148 Little is known about the patient's and caregiver's perspective of living with HF  
42  
43 149 in Spain, and previous studies did not evaluate patients by LVEF.<sup>31</sup> The objective of  
44  
45 150 this study was to gather insights on the disease experiences of patients with HFrEF  
46  
47 151 and their caregivers, and the impact on their everyday life. We used a mixed methods  
48  
49 152 approach involving the parallel use of an ethnographic approach with PROMs for the  
50  
51 153 assessment of health status (EQ-5D-5L and KCCQ). Rather than seeking corroboration  
52  
53 154 of results from different data sources, the mixed methods approach intended to  
54  
55 155 highlight the complementarity of ethnographic data and PROMs.<sup>32,33</sup> The goal was to  
56  
57 156 improve awareness of healthcare professionals, service providers, policy makers and  
58  
59 157 educators on the factors that can potentially influence treatment effectiveness, and the  
60

1  
2  
3 158 existence of aspects of the patient's experience that are not covered by existing tools.  
4  
5 159 In turn, this may encourage firstly, a more active participation of healthcare providers,  
6  
7 160 patients and caregivers in clinical decisions considering not only the disease state, but  
8  
9 161 also cultural factors and individual values and attitudes, and secondly, the development  
10  
11 162 of instruments for the evaluation of healthcare interventions.  
12  
13  
14 163  
15  
16 164  
17  
18 165

## 19 20 166 **METHODS**

21  
22 167  
23  
24 168 We conducted an observational, cross-sectional, descriptive, multicenter, and mixed  
25  
26 169 methods study to obtain insights regarding HFREF patients' perception and attitudes  
27  
28 170 towards their disease. The patients in the study were recruited at the Departments of  
29  
30 171 Cardiology of 2 large tertiary-level hospitals, namely, the Puerta del Hierro University  
31  
32 172 Hospital (Majadahonda, Madrid, Spain) and the Bellvitge University Hospital (Hospitalet  
33  
34 173 de Llobregat, Barcelona, Spain). The patient populations attended by these hospitals  
35  
36 174 were socioeconomically very distinct, as the Puerta del Hierro University Hospital is  
37  
38 175 located at a high-income district of Madrid, and the Bellvitge University Hospital covers  
39  
40 176 a suburban area of mostly low or very low-income patients. Due to the qualitative and  
41  
42 177 observational design of the study, there was no masking or randomization. Clinical  
43  
44 178 management of the patients followed routine clinical practice, with no changes in  
45  
46 179 treatment or additional clinical assessments specific for this study. All decisions related  
47  
48 180 to disease management were made at the discretion of the treating physician without  
49  
50 181 interference by the sponsor. Informed consent was obtained from each patient prior to  
51  
52 182 study initiation. The patients authorized the interview with their main caregiver as part  
53  
54 183 of the informed consent process. The study protocol was approved by the Ethics  
55  
56 184 Review Board of the Bellvitge University Hospital on March 12<sup>th</sup>, 2020 with number  
57  
58 185 PR062/20.  
59  
60



186

**187 Patient selection**

188 Patients were assessed for eligibility by local clinical staff according to selection criteria  
189 at each participating center. Patients were classified by NYHA class and could be  
190 belong to any of the 4 classes I to IV. The inclusion criteria were  $\geq 18$  years at the time  
191 of consent, established documented diagnosis of HFrEF (LVEF  $\leq 40\%$ ), and signed  
192 consent to participate. Patients unable to complete the PROMs because of any  
193 psychological or physical condition and patients hospitalized at inclusion were  
194 excluded.

195 A sample size of 20 patients was selected to have sufficient representation of  
196 the 3 major NYHA classes. Purposeful sampling was based on the characteristics of  
197 potential participants extracted from medical records to obtain optimal variety.

198

**199 Data collection**

200 The patient's demographic information and medical history were collected from medical  
201 records at the selection visit. On the day of the home visit the patients first completed  
202 two health status questionnaires and then two female senior researchers (SCC, MFE)  
203 with  $>5$  years of experience in medical sociology and medical anthropology conducted  
204 a semi-structured interview following a topic guide (See Supplementary Materials).

205 There was no prior relationship between the interviewer and the patient, who was  
206 informed about the research goals prior to starting the interview. The interview  
207 conducted at the patient's home lasted approximately 90 minutes. In some instances,  
208 with the consent of the patient, his/her closest caregivers were interviewed at the  
209 patient's home on the same day for about 30 min. The interview with the caregivers  
210 aimed at understanding their perception of the patient's status and evaluating their  
211 social and emotional relationship with the patient.

212 In order to gather observational data to complement participants' accounts of  
213 their medical experience, 6 out of 20 patients (two per NYHA class) consented that the

1  
2  
3 214 same researcher carrying out the interview would observe their first healthcare  
4  
5 215 appointment after the home interview. Direct observation allowed researchers to gather  
6  
7 216 information regarding patients' objective and subjective experiences during medical  
8  
9 217 encounters, about how patients and caregivers conveyed concerns and needs, and  
10  
11 218 provided clues about incongruent behaviour. A single appointed researcher observed  
12  
13 219 the initial and main focus of conversations with healthcare providers, questions by  
14  
15 220 patients and caregivers, and patients' use of verbal and non-verbal communication  
16  
17 221 (e.g., behaviour that suggested passive, nervous, impatient, caring, or expectant  
18  
19 222 attitudes). Immediately after the appointment, patients and caregivers, if present, were  
20  
21 223 asked to evaluate the medical visit (clinical encounters last 20 minutes on average).  
22  
23  
24 224 Researchers took field notes and added reflexive comments about the encounter and  
25  
26 225 about participants' experience.

27  
28 226 The in-depth interview aimed to capture the patients' experience with the  
29  
30 227 disease from their own point of view, whereas the non-participant observation during  
31  
32 228 the medical visits allowed to investigate the relationship with the healthcare  
33  
34 229 practitioners for both of patients and family members.

35  
36 230 Data from in-depth interviews were collected by audio recording and field notes,  
37  
38 231 whereas data from direct observation of medical encounters were collected by field  
39  
40 232 notes only, taking into consideration all aspects of the patient's life and in all cases  
41  
42 233 protecting the patient's data privacy.  
43  
44

45 234

### 47 235 **Quantitative outcomes and analyses**

48  
49 236 Secondary variables assessed included PROMs by using the EQ-5D-5L and KCCQ.  
50  
51 237 The EQ-5D-5L is a self-reported questionnaire used to derive a standardized measure  
52  
53 238 of health status, also referred to as a utility score.<sup>34</sup> The KCCQ is a self-administered  
54  
55 239 HF-specific instrument and has shown to be a valid, reliable and responsive measure  
56  
57 240 for patients with HF.<sup>14</sup> Spanish validated versions of these questionnaires were  
58  
59 241 used.<sup>35,36</sup> For the EQ-5D-5L, the number and percentage of patients reporting any type

1  
2  
3 242 of limitation for each questionnaire dimension, the number and percentage of patients  
4  
5 243 reporting “severe” or “extreme” responses for each questionnaire dimension, as well as  
6  
7 244 the index value and the visual analogue scale (VAS, where 100 equals the best health  
8  
9 245 HF patients can imagine), were assessed; for the KCCQ, the score for each  
10  
11 246 domain/subdomain, and a summary score for the total symptom score, clinical  
12  
13 247 symptom score and overall summary score were assessed (scores range from 0 to  
14  
15 248 100; were higher scores indicate a better health status). The PROMs were analyzed  
16  
17 249 descriptively.  
18  
19  
20  
21

### 22 251 ***Qualitative outcomes and analyses***

23  
24 252 The following primary variables were assessed: the patient’s profile; the patient’s  
25  
26 253 emotional perception (values, attitude, frustration, fear) during the HFREF journey,  
27  
28 254 including the role of the caregiver; key relationships and communication processes  
29  
30 255 during the patient HFREF journey (patient-doctor, patient-carer/family); main barriers to  
31  
32 256 accessing healthcare services experienced by patients during the HFREF journey; and  
33  
34 257 the patient’s unmet needs (cognitive, emotional and functional) associated with HF.  
35  
36 258 Observational data, interviews and documentary materials were analyzed at three  
37  
38 259 levels: individual patient cases, across cases within research centers, and across  
39  
40 260 research centers to synthesis.  
41  
42

43 261 Thematic content analysis was used to analyse the data gathered from  
44  
45 262 interviews and direct observation of clinical encounters. The analysis was carried out  
46  
47 263 by field researchers in six steps: 1) read and re-read of interview and medical  
48  
49 264 encounters’ fieldnotes; 2) identification of main topics per interview domain; 3) text  
50  
51 265 codification to identify current and new domains; 4) review of PROM scores per  
52  
53 266 interviewer and NYHA class; 5) comparison of PROM scores and fieldwork data; and  
54  
55 267 6) and synthesis of repetitive patterns.  
56  
57

58 268 Subsequently, data triangulation was used to integrate quantitative and  
59  
60 269 qualitative information by the researchers, individually and in joint sessions. Three

1  
2  
3 270 types of triangulation were used: investigator, data and methodological triangulation.  
4  
5 271 Two investigators were involved in the data collection and analysis. Findings from each  
6  
7 272 investigator were compared to develop a deeper understanding of how the different  
8  
9 273 investigators view the issue. Preliminary conclusions were discussed with the broader  
10  
11 274 team of authors in further analysis sessions. Regarding data triangulation, investigators  
12  
13 275 compared the answers from patients and caregivers (information sources) separately  
14  
15 276 to identify areas of agreement and disagreement over the main topics. Regarding  
16  
17 277 methodological triangulation, findings from interviews, direct observations of medical  
18  
19 278 appointments, and PROM scores were compared to identify incongruences and  
20  
21 279 disparities in patients' responses (e.g., patients reporting mild limitations in PROMs but  
22  
23 280 highlighting severe limitations during the interview and/or medical appointment).

26 281 The analytical process aimed to reach theoretical saturation where no new  
27  
28 282 dimensions emerged during joint sessions.  
29  
30  
31 283  
32  
33 284

## 34 285 **RESULTS**

### 37 286 38 287 ***Patient characteristics***

40 288 A total of 20 patients with HF<sub>r</sub>EF participated in the study (Table 1). The mean (SD)  
41  
42 289 age of the patients was 72.5 (11.4) years (range, 38-85 years), and 13 (65.0%) were  
43  
44 290 male. The study included 4, 7 and 9 patients in NYHA functional classes I-III,  
45  
46 291 respectively. Although the study protocol was designed to include class IV patients,  
47  
48 292 their frailty, and the effects of the COVID-19 pandemic in the patients' self-caring  
49  
50 293 strategies, hindered the participation of any patients in this class. Twelve patients were  
51  
52 294 being treated at the Bellvitge University Hospital and 8 patients were being treated at  
53  
54 295 the Puerta del Hierro University Hospital.  
55  
56 296

### 57 297 ***Understanding of QoL by patients with HF***

1  
2  
3 298 During the in-depth interviews, the participants described how living with HFrEF  
4  
5 299 impacted their lives, including how they experienced the symptoms of HF and their  
6  
7 300 effects on daily routines (summarized in Table 2). Their responses provided relevant  
8  
9 301 insights on what QoL meant to them. For many patients, QoL was "being able to do  
10  
11 302 what they did before" and missed being independent, their everyday life and  
12  
13 303 maintaining an active lifestyle.

14  
15 304 Patients tended to self-limit and isolate to limit symptomatology due to  
16  
17 305 progression-related fears or even fear to a sudden death, despite a more sedentary  
18  
19 306 lifestyle being detrimental to the recovery and to their own QoL.  
20  
21

22 307

### 23 308 ***Impact of demographic factors in perception of QoL***

24  
25 309 Attitudes and perceptions towards HFrEF seemed to strongly depend on age and  
26  
27 310 education. Young patients tend to be more informed about the disease and challenge  
28  
29 311 the healthcare practitioners' opinions.  
30  
31

32 312 In contrast, older patients had a difficult time differentiating between HFrEF  
33  
34 313 symptoms and those associated with the normal process of ageing. Often caregivers  
35  
36 314 had to help them understand the information provided by healthcare workers.  
37  
38

39 315 The interviews also revealed that male patients showed more dependency towards  
40  
41 316 caregivers than their female counterparts. Female caregivers tended to strongly  
42  
43 317 challenge male patients' perception of QoL. In one case, the wife of a NYHA III patient  
44  
45 318 was very critical of her husband's attitude and thought that part of his evolution strongly  
46  
47 319 depended on his will, and asked him to exercise more, read, get on the computer, and  
48  
49 320 go out for a ride on the motorcycle. They even consulted with a psychologist friend to  
50  
51 321 help them handle the situation.  
52

53 322

### 54 323 ***PROMs and health status***

55  
56 324 The results of the EQ-5D-5L and KCCQ showed a strong correspondence with the  
57  
58 325 NYHA functional classes, and also between the two PROMs (Table 3). We found that  
59  
60

1  
2  
3 326 scores from PROMs dropped as the NYHA increased (i.e., the higher the NYHA class  
4  
5 327 and the HF symptoms, the worse their perceived health status was). No differences  
6  
7 328 were observed in scores with respect to gender, or between the patients from the two  
8  
9 329 hospitals.

10  
11 330 Some patients with lower NYHAs, despite having visible constraints in health  
12  
13 331 status, indicated high scores in the EQ-5D-5L VAS score. For example, a patient with  
14  
15 332 major comorbidities [1-10] with NYHA I indicated a EQ-5D-5L VAS score of 90 and  
16  
17 333 emphasized that her QoL was good. This contrasted with the views expressed by her  
18  
19 334 caregiver (Table 2).

20  
21  
22 335 Regardless of the NYHA, some patients seemed to minimize and relativize the  
23  
24 336 impact of HFrEF on their QoL. Caregivers, in contrast, could emphasize the limitations  
25  
26 337 imposed by HFrEF. For example, the wife and caregiver of a NYHA II patient [1-11]  
27  
28 338 indicated that in the consultation with the cardiologist the patient usually  
29  
30 339 underestimated his condition. In another case, the wife of a NYHA III patient  
31  
32 340 commented that she must be “present with the doctors, because when they ask him  
33  
34 341 something, he usually answers that he is fine and does not really say what is wrong  
35  
36 342 with him.”

37  
38  
39 343 Patients with advanced NYHAs, who experienced one or several hospital  
40  
41 344 admissions, compared their current experience with the disease to those acute periods  
42  
43 345 of fear and greater uncertainty. Patients showed a limited portrait of their QoL due to  
44  
45 346 the required reference to the last 2-weeks in the questionnaire. For example, a NYHA  
46  
47 347 III patient [2-8] had doubts when filling out the questionnaires since he related his  
48  
49 348 mobility limitations to a problem with his legs (a consequence of an aortic dissection)  
50  
51 349 but he did not relate it to HF. Also, he mentioned that his physical and emotional  
52  
53 350 situation was much better now compared to the initial moments where he was more  
54  
55 351 affected. He had a hard time taking the prior two weeks as a reference point, therefore  
56  
57 352 his responses showed a feeling of improvement compared to the most critical  
58  
59 353 moments.  
60

1  
2  
3 354 Another NYHA III patient [2-6] had doubts when filling the questionnaires, since  
4  
5 355 his symptoms varied from day to day and between morning, afternoon and night. He  
6  
7 356 also had moments of crises where he considered his symptoms to be worse, so limiting  
8  
9 357 to the last two weeks seemed difficult. Likewise, he stated that shortness of breath or  
10  
11 358 air was something he thought he got from lying down for a long time and not that it was  
12  
13 359 a symptom of HFrEF.

14  
15 360 Caregivers could overestimate and present a dramatic view of the patient's day-  
16  
17 361 to-day life with HFrEF. Family caregivers showed more distress when discussing their  
18  
19 362 relatives with HFrEF compared to that showed by remunerated caregivers:  
20  
21

22 363

23  
24 364 *“she is concerned about his low spirits and his anguish. She says that the*  
25  
26 365 *symptoms she develops from anxiety can “mask” the symptoms of HF,*  
27  
28 366 *such as pressure and pain in the chest, agitation, a feeling of suffocation.”*

29  
30 367 [caregiver of patient 1-8, NYHA III]  
31

32 368

33  
34 369 *“As cardiologists told us that little can be done to improve his condition, we*  
35  
36 370 *live these years ‘as a gift’.”* [caregiver of patient 1-6]  
37

38  
39 371

### 40 41 372 **Caregivers' roles and needs**

42  
43 373 In this study, only five patients were able to live without a caregiver. Generally, strong  
44  
45 374 family bonds were apparent and important for the patient. Caregivers were often in  
46  
47 375 charge of organizing visits to the healthcare providers, keeping track of parameters  
48  
49 376 such as weight and blood pressure, and administering medication (Table 2).

50  
51 377 Caregivers acted also as interpreters of the disease status on behalf of their patients.  
52

53 378

### 54 55 379 **Relationships with healthcare providers**

56  
57 380 The interactions between patients and caregivers with healthcare workers at  
58  
59 381 hospitals were investigated by the social scientists by accompanying them to a

1  
2  
3  
4  
5  
6  
7  
8  
9  
10  
11  
12  
13  
14  
15  
16  
17  
18  
19  
20  
21  
22  
23  
24  
25  
26  
27  
28  
29  
30  
31  
32  
33  
34  
35  
36  
37  
38  
39  
40  
41  
42  
43  
44  
45  
46  
47  
48  
49  
50  
51  
52  
53  
54  
55  
56  
57  
58  
59  
60

382 medical appointment. The study showed that patients are usually highly positive  
383 about their experience with cardiologists and nurses (Table 2). A patient [1-9]  
384 explained that the nurse called him weekly to ask about how he was coping,  
385 and to discuss data such as weight and blood pressure changes. He generally  
386 felt very accompanied by the hospital staff, both cardiologists and nurses. Other  
387 patients also expressed a high opinion of the healthcare personnel. Often  
388 patients highly value their relationship with the nurse, as they probably feel  
389 more confident to express their experiences to his/her.

390  
391  
392

For peer review only



1  
2  
3 393 **DISCUSSION**  
4  
5 394

6  
7 395 In this study we used ethnographic methods with HFREF patients and their caregivers,  
8  
9 396 complemented with general and disease-specific health status assessments, to obtain  
10  
11 397 insights regarding patients' disease perception and attitudes towards their disease.

12  
13 398 Ethnographic methods adopt a phenomenological perspective, aiming to understand  
14  
15 399 individuals' life experiences to acquire relevant knowledge. The results of this study  
16  
17 400 suggest that the patient's perspectives of their QoL were dependent on their memories  
18  
19 401 of what they could do before, and often were better than reality. Caregivers, in contrast,  
20  
21 402 offered a distinct view of the patient's status and QoL, often substantially worse and  
22  
23 403 emphasizing the severity of their life-limiting condition.

24  
25  
26 404 As healthcare systems aim to become more 'patient-centered', there is a  
27  
28 405 recognized need to capture accurately the patient's experience of the disease, in an  
29  
30 406 effort to improve it. The use of PROMs have therefore become common in assessing  
31  
32 407 current treatments and new therapies and medical interventions, although their  
33  
34 408 application in clinical practice is still very limited. Despite their widespread use by  
35  
36 409 cardiologists, an awareness of the limitations of PROMs when evaluating the  
37  
38 410 experience of the patient with HF is critical for their interpretation. For example, the  
39  
40 411 effects of comorbid conditions could add confounding factors to the evaluation of HF  
41  
42 412 through a single PROM instrument. Likewise, patients often relate their overall QoL  
43  
44 413 experience to the moments of crisis, such as hospitalizations, 'anchoring' all  
45  
46 414 subsequent experiences to those events and distorting their responses in the  
47  
48 415 questionnaires.

49  
50  
51 416 In the general population the understanding of HF and its outcome is low,  
52  
53 417 contributing to anxiety about the evolution of the disease in both patients and  
54  
55 418 caregivers. In contrast, other life-limiting diseases, such as cancer, often have better-  
56  
57 419 defined pathways of care and psychosocial support.<sup>30</sup> In this regard, patient  
58  
59 420 associations and support groups could play a role by helping the patient understand

1  
2  
3 421 the disease, the treatments, and the expectations. Patient associations promote social  
4  
5 422 integration and help patient share their experiences, providing the necessary  
6  
7 423 encouragement to cope with their disease and go on with daily activities. Also, as  
8  
9 424 reflected in some of the interviews described in this study, it is important for the patient  
10  
11 425 to feel that he/she can have rapid access to medical services. In this regard, the study  
12  
13 426 reflected that that while some patients were reluctant to discuss aspects of daily life or  
14  
15 427 to express their feelings and fears to the cardiologist, they were more open and felt  
16  
17 428 closer to the nurse, a relationship that was highly valued by many patients. Generally,  
18  
19 429 an efficient and fluid communication with all the healthcare providers involved in the  
20  
21 430 treatment is essential.<sup>12,29</sup>

22  
23  
24 431 The study revealed that the fear to losing independence and the uncertainty  
25  
26 432 about the progress of their disease could be factors that motivate some HF patients to  
27  
28 433 downplay their limitations. Conversely, caregivers could overemphasize the poor QoL  
29  
30 434 of the patients, also motivated by concerns of the progress of the disease, its  
31  
32 435 unpredictable trajectory, and lack of proper knowledge and training. Also, it is possible  
33  
34 436 that, since these caregivers were very often family members, their views could be  
35  
36 437 overstated due to emotional attachment to the patient. In any case, these results  
37  
38 438 suggest that instruments should be developed to help caregivers in their daily work with  
39  
40 439 patients with HF, so that they are better informed on the course of the disease and  
41  
42 440 expectations.<sup>25</sup> In this regard, numerous recent studies have highlighted challenges  
43  
44 441 experienced by caregivers of patients with HF.<sup>37-40</sup> Some initiatives along these lines,  
45  
46 442 such caregiver-specific QoL questionnaires,<sup>41</sup> and video coaching,<sup>42,43</sup> are currently  
47  
48 443 being developed and tested.

49  
50  
51 444 The results of our study suggest recommendations for future PROM design or  
52  
53 445 questionnaire selection. In patients with HF the PROM instruments should aim to truly  
54  
55 446 mirror patients' experience, using language that the patient associates with their  
56  
57 447 cultural views of QoL. To provide insights on relevant changes in QoL, the PROMs  
58  
59 448 should be constructed to capture specific timepoints related to the patient experience  
60

1  
2  
3 449 (e.g., healthcare status before the diagnosis, and before and after hospitalizations). In  
4  
5 450 this way, reference points in the patient's lives could be established that favored  
6  
7 451 meaningful QoL before/after comparisons. Instruments should allow an alternative  
8  
9 452 stratification based on these clinical events and patients' perceived QoL along them.  
10  
11 453 Also, as self-care behaviors can greatly affect symptoms in patients with HF,<sup>44</sup> the  
12  
13 454 patient's self-caring strategies, perception of autonomy, level of empowerment, and the  
14  
15 455 perception of past and present experiences with the disease should be taken into  
16  
17 456 consideration when developing and introducing future PROM instruments.<sup>45</sup> Finally,  
18  
19 457 additional instruments should be developed to evaluate the key aspects of the patient'  
20  
21 458 support system, and explore caregivers' needs.

22  
23  
24 459         Given the lack of studies assessing the patient's and caregiver's perspective on  
25  
26 460 the HFrEF pathway in Spain, this study aimed to fill this gap to better understand  
27  
28 461 possible cultural differences. The ethnographic approach, which involved in-depth  
29  
30 462 interviews with patients at their homes and with their caregivers, made it possible to  
31  
32 463 collect relevant data not normally discussed or shared in healthcare facilities. Both  
33  
34 464 patients and caregivers could talk freely and explain the aspects of the disease that  
35  
36 465 they considered under control and those where change was deemed necessary.  
37  
38 466 However, a limitation of this study is that the small sample size, although not unusual in  
39  
40 467 qualitative research that requires extensive and detailed analysis of each patient, may  
41  
42 468 not fully represent the diversity of people with HFrEF in Spain. Also, as it is the case in  
43  
44 469 other ethnographic studies, interviewing patients and caregivers together may have  
45  
46 470 resulted in individual perspectives being altered or withheld. Finally, since this study  
47  
48 471 was carried out during the COVID-19 pandemic, it is possible that the disruption  
49  
50 472 imposed by the social restrictions could have some effect in the results described here.

51  
52  
53 473         In conclusion, this study analyzed, by the use of PROMs and in-depth  
54  
55 474 interviews, the complexity of the actual experiences of the patients with HFrEF. The  
56  
57 475 lack of knowledge about the disease generates confusion and anxiety about  
58  
59 476 symptoms, and patients could tend to minimize the impact of HF in QoL. Patients tend

1  
2  
3 477 to maintain a closer relationship with their nurses, compared with the cardiologist,  
4  
5 478 favoring a more open discussion of feelings and experiences related to the disease  
6  
7 479 with them. In order to provide personalized care to HFREF patients, QoL could be  
8  
9 480 assessed by comparing two points in time, thus helping the healthcare practitioner  
10  
11 481 understand the patient's point of view of specific interventions. Since QoL is a  
12  
13 482 multidimensional, subjective concept that is affected by a variety of factors, its  
14  
15 483 evaluation should be carefully designed to capture specific moments and changes in  
16  
17 484 the trajectory of the disease. The study suggests that tools and training should be  
18  
19 485 made available to caregivers to alleviate the burden of care and anxiety derived from  
20  
21 486 uncertainty in the progression of the disease. Further work is needed to fully integrate  
22  
23 487 the use of well-designed and useful PROMs into clinical practice.  
24  
25  
26 488  
27  
28 489  
29  
30 490  
31

### 32 491 **Acknowledgements**

33  
34 492 Medical writing assistance was provided by Francisco López de Saro, PhD (Trialance).  
35  
36 493

### 37 494 **Contributors**

38  
39 495 RR, LV, SCC, JCC and BP conceived and designed the study. JCC, EC, EH, ECB,  
40  
41 496 PGC, NJ, MRM, CE, SY, SJM, LAT, AGM, PMB, LYF, JSC, SVL, and MSG contributed  
42  
43 497 to patient recruitment and data collection. JCC, JSC, BP, LV, SCC, MFE, and RR  
44  
45 498 compiled and analyzed the data. JCC, BP, LV, SCC, and RR drafted the manuscript,  
46  
47 499 which was revised by the other authors. All authors read and approved the final  
48  
49 500 manuscript.  
50  
51 501

### 52 502 **Funding**

53  
54 503 This work was supported by AstraZeneca España. Grant number does not apply.  
55  
56 504

1  
2  
3 505 **Competing interests**  
4

5 506 JCC received fees from AstraZeneca for the coordination and oversight of the study.  
6

7 507 RR, MFE, and SCC received research funding from AstraZeneca. RFdIF, BP, and LV  
8

9 508 are employees of AstraZeneca. All other authors report no competing interests.  
10

11 509  
12

13 510 **Patient and public involvement**  
14

15 511 CardioAlianza, a Spanish association of patients with cardiovascular disease and their  
16

17 512 caregivers, was involved in designing, providing feedback for interpretation of data, and  
18

19 513 in the dissemination of this research.  
20

21 514  
22

23 515 **Patient consent for publication**  
24

25 516 Informed consent for participation in the study and publication of the results were  
26

27 517 obtained from each patient prior to study initiation.  
28

29 518  
30

31 519 **Ethics approval**  
32

33 520 This study was approved by the Ethics Review Board of the Bellvitge University  
34

35 521 Hospital on March 12<sup>th</sup>, 2020 with number PR062/20.  
36

37 522  
38

39 523 **Data availability statement**  
40

41 524 The data that support the findings of this study are available on reasonable request  
42

43 525 from the corresponding author. The data are not publicly available due to their  
44

45 526 containing information that could compromise the privacy of research participants.  
46

47 527  
48  
49  
50  
51  
52  
53  
54  
55  
56  
57  
58  
59  
60

## REFERENCES

1. Savarese G, Lund LH. Global Public Health Burden of Heart Failure. *Card Fail Rev.* 2017;3(1):7-11. doi:10.15420/cfr.2016:25:2
2. Crespo-Leiro MG, Metra M, Lund LH, et al. Advanced heart failure: a position statement of the Heart Failure Association of the European Society of Cardiology. *Eur J Heart Fail.* 2018;20(11):1505-1535. doi:10.1002/ejhf.1236
3. Hollingworth W, Biswas M, Maishman RL, et al. The healthcare costs of heart failure during the last five years of life: A retrospective cohort study. *Int J Cardiol.* 2016;224:132-138. doi:10.1016/j.ijcard.2016.09.021
4. Agbor VN, Ntusi NAB, Noubiap JJ. An overview of heart failure in low- and middle-income countries. *Cardiovasc Diagn Ther.* 2020;10(2):244-251. doi:10.21037/cdt.2019.08.03
5. Farré N, Vela E, Clèries M, et al. Medical resource use and expenditure in patients with chronic heart failure: a population-based analysis of 88 195 patients. *Eur J Heart Fail.* 2016;18(9):1132-1140. doi:10.1002/ejhf.549
6. Farré N, Vela E, Clèries M, et al. Real world heart failure epidemiology and outcome: A population-based analysis of 88,195 patients. *PLoS One.* 2017;12(2):e0172745. doi:10.1371/journal.pone.0172745
7. Méndez-Bailón M, Jiménez-García R, Hernández-Barrera V, et al. Significant and constant increase in hospitalization due to heart failure in Spain over 15 year period. *Eur J Intern Med.* 2019;64:48-56. doi:10.1016/j.ejim.2019.02.019
8. McDonagh TA, Metra M, Adamo M, et al. 2021 ESC Guidelines for the diagnosis and treatment of acute and chronic heart failure. *European Heart Journal.* 2021;42(36):3599-3726. doi:10.1093/eurheartj/ehab368
9. Bhatt AS, Abraham WT, Lindenfeld J, et al. Treatment of HF in an Era of Multiple Therapies: Statement From the HF Collaboratory. *JACC Heart Fail.* 2021;9(1):1-12. doi:10.1016/j.jchf.2020.10.014
10. Upadhyaya B, Kitzman DW. Heart failure with preserved ejection fraction: New approaches to diagnosis and management. *Clin Cardiol.* 2020;43(2):145-155. doi:10.1002/clc.23321
11. Criteria Committee, New York Heart Association. *Diseases of the Heart and Blood Vessels. Nomenclature and Criteria for Diagnosis.* 6th ed. Little, Brown; 1964.
12. Fry M, McLachlan S, Purdy S, Sanders T, Kadam UT, Chew-Graham CA. The implications of living with heart failure; the impact on everyday life, family support, co-morbidities and access to healthcare: a secondary qualitative analysis. *BMC Fam Pract.* 2016;17(1):139. doi:10.1186/s12875-016-0537-5
13. Comín-Colet J, Anguita M, Formiga F, et al. Health-related Quality of Life of Patients With Chronic Systolic Heart Failure in Spain: Results of the VIDA-IC Study. *Revista Española de Cardiología.* 2016;69(3):256-271. doi:10.1016/j.recesp.2015.07.034
14. Green CP, Porter CB, Bresnahan DR, Spertus JA. Development and evaluation of the Kansas City Cardiomyopathy Questionnaire: a new health status measure for



- 1  
2  
3 571 heart failure. *J Am Coll Cardiol*. 2000;35(5):1245-1255. doi:10.1016/s0735-  
4 572 1097(00)00531-3
- 5  
6 573 15. Garin O, Herdman M, Vilagut G, et al. Assessing health-related quality of life in  
7 574 patients with heart failure: a systematic, standardized comparison of available  
8 575 measures. *Heart Fail Rev*. 2014;19(3):359-367. doi:10.1007/s10741-013-9394-7
- 9  
10 576 16. Burns DJP, Arora J, Okunade O, et al. International Consortium for Health  
11 577 Outcomes Measurement (ICHOM): Standardized Patient-Centered Outcomes  
12 578 Measurement Set for Heart Failure Patients. *JACC: Heart Failure*. 2020;8(3):212-  
13 579 222. doi:10.1016/j.jchf.2019.09.007
- 14  
15 580 17. Kelkar AA, Spertus J, Pang P, et al. Utility of Patient-Reported Outcome  
16 581 Instruments in Heart Failure. *JACC Heart Fail*. 2016;4(3):165-175.  
17 582 doi:10.1016/j.jchf.2015.10.015
- 18  
19 583 18. Rumsfeld JS, Alexander KP, Goff DC, et al. Cardiovascular health: the importance  
20 584 of measuring patient-reported health status: a scientific statement from the  
21 585 American Heart Association. *Circulation*. 2013;127(22):2233-2249.  
22 586 doi:10.1161/CIR.0b013e3182949a2e
- 23  
24 587 19. Psotka MA, von Maltzahn R, Anatchkova M, et al. Patient-Reported Outcomes in  
25 588 Chronic Heart Failure: Applicability for Regulatory Approval. *JACC Heart Fail*.  
26 589 2016;4(10):791-804. doi:10.1016/j.jchf.2016.04.010
- 27  
28 590 20. Nieminen MS, Dickstein K, Fonseca C, et al. The patient perspective: Quality of life  
29 591 in advanced heart failure with frequent hospitalisations. *International Journal of*  
30 592 *Cardiology*. 2015;191:256-264. doi:10.1016/j.ijcard.2015.04.235
- 31  
32 593 21. Pennucci F, De Rosis S, Passino C. Piloting a web-based systematic collection and  
33 594 reporting of patient-reported outcome measures and patient-reported experience  
34 595 measures in chronic heart failure. *BMJ Open*. 2020;10(10):e037754.  
35 596 doi:10.1136/bmjopen-2020-037754
- 36  
37 597 22. Heo S, Lennie TA, Okoli C, Moser DK. Quality of life in patients with heart failure:  
38 598 ask the patients. *Heart Lung*. 2009;38(2):100-108. doi:10.1016/j.hrtlng.2008.04.002
- 39  
40 599 23. Gwaltney. Hearing the voice of the heart failure patient: key experiences identified  
41 600 in qualitative interviews. *Br J Cardiol*. 2012;19(1). doi:10.5837/bjc.2012.004
- 42  
43 601 24. Etemadifar S, Bahrami M, Shahriari M, Farsani AK. Family caregivers' experiences  
44 602 of caring for patients with heart failure: a descriptive, exploratory qualitative study. *J*  
45 603 *Nurs Res*. 2015;23(2):153-161. doi:10.1097/JNR.0000000000000076
- 46  
47 604 25. Grant JS, Graven LJ. Problems experienced by informal caregivers of individuals  
48 605 with heart failure: An integrative review. *Int J Nurs Stud*. 2018;80:41-66.  
49 606 doi:10.1016/j.ijnurstu.2017.12.016
- 50  
51 607 26. Bjornsdottir K, Ketilsdottir A, Gudnadottir M, Kristinsdottir IV, Ingadottir B.  
52 608 Integration of nursing services provided to patients with heart failure living at home:  
53 609 A longitudinal ethnographic study. *J Clin Nurs*. Published online January 12, 2021.  
54 610 doi:10.1111/jocn.15658
- 55  
56 611 27. Kim EY, Oh S, Son Y-J. Caring experiences of family caregivers of patients with  
57 612 heart failure: A meta-ethnographic review of the past 10 years. *Eur J Cardiovasc*  
58 613 *Nurs*. 2020;19(6):473-485. doi:10.1177/1474515120915040

- 1  
2  
3 614 28. Simmonds R, Glogowska M, McLachlan S, et al. Unplanned admissions and the  
4 615 organisational management of heart failure: a multicentre ethnographic, qualitative  
5 616 study. *BMJ Open*. 2015;5(10):e007522. doi:10.1136/bmjopen-2014-007522
- 7 617 29. Glogowska M, Simmonds R, McLachlan S, et al. Managing patients with heart  
8 618 failure: a qualitative study of multidisciplinary teams with specialist heart failure  
9 619 nurses. *Ann Fam Med*. 2015;13(5):466-471. doi:10.1370/afm.1845
- 11 620 30. Glogowska M, Simmonds R, McLachlan S, et al. "Sometimes we can't fix things": a  
12 621 qualitative study of health care professionals' perceptions of end of life care for  
13 622 patients with heart failure. *BMC Palliat Care*. 2016;15:3. doi:10.1186/s12904-016-  
14 623 0074-y
- 16 624 31. Checa C, Medina-Perucha L, Muñoz M-Á, Verdú-Rotellar JM, Berenguera A. Living  
17 625 with advanced heart failure: A qualitative study. *PLoS One*. 2020;15(12):e0243974.  
18 626 doi:10.1371/journal.pone.0243974
- 21 627 32. Greene JC, Caracelli VJ, Graham WF. Toward a Conceptual Framework for Mixed-  
22 628 Method Evaluation Designs. *Educational Evaluation and Policy Analysis*.  
23 629 1989;11(3):255-274. doi:10.3102/01623737011003255
- 25 630 33. Kane PM, Daveson BA, Ryan K, et al. Feasibility and acceptability of a patient-  
26 631 reported outcome intervention in chronic heart failure. *BMJ Support Palliat Care*.  
27 632 2017;7(4):470-479. doi:10.1136/bmjspcare-2017-001355
- 29 633 34. Herdman M, Gudex C, Lloyd A, et al. Development and preliminary testing of the  
30 634 new five-level version of EQ-5D (EQ-5D-5L). *Qual Life Res*. 2011;20(10):1727-  
31 635 1736. doi:10.1007/s11136-011-9903-x
- 33 636 35. Hernandez G, Garin O, Pardo Y, et al. Validity of the EQ-5D-5L and reference  
34 637 norms for the Spanish population. *Qual Life Res*. 2018;27(9):2337-2348.  
35 638 doi:10.1007/s11136-018-1877-5
- 37 639 36. Comín-Colet J, Garin O, Lupón J, et al. Validación de la versión española del  
38 640 Kansas City Cardiomyopathy Questionnaire. *Revista Española de Cardiología*.  
39 641 2011;64(1):51-58. doi:10.1016/j.recesp.2010.10.003
- 41 642 37. Wingham J, Frost J, Britten N. Behind the smile: qualitative study of caregivers'  
42 643 anguish and management responses while caring for someone living with heart  
43 644 failure. *BMJ Open*. 2017;7(7):e014126. doi:10.1136/bmjopen-2016-014126
- 45 645 38. Östman M, Bäck-Pettersson S, Sandvik A-H, Sundler AJ. "Being in good hands":  
46 646 next of kin's perceptions of continuity of care in patients with heart failure. *BMC*  
47 647 *Geriatr*. 2019;19(1):375. doi:10.1186/s12877-019-1390-x
- 49 648 39. Al-Rawashdeh S, Ashour A, Alshraifeen A, Rababa M. Experiences on Providing  
50 649 Home Care for A Relative with Heart Failure: A Qualitative Study. *J Community*  
51 650 *Health Nurs*. 2020;37(3):129-140. doi:10.1080/07370016.2020.1780043
- 53 651 40. Barnes S, Whittingham K. Informal carers' experiences of caring for a person with  
54 652 heart failure in a community setting. *Health Soc Care Community*. 2020;28(3):883-  
55 653 890. doi:10.1111/hsc.12919
- 57 654 41. Wingham J, Frost J, Britten N, et al. Caregiver outcomes of the REACH-HF  
58 655 multicentre randomized controlled trial of home-based rehabilitation for heart failure
- 60



- 1  
2  
3 656 with reduced ejection fraction. *Eur J Cardiovasc Nurs*. 2019;18(7):611-620.  
4 657 doi:10.1177/1474515119850011  
5  
6 658 42. Riegel B, Hanlon AL, Coe NB, et al. Health coaching to improve self-care of  
7 659 informal caregivers of adults with chronic heart failure - iCare4Me: Study protocol  
8 660 for a randomized controlled trial. *Contemp Clin Trials*. 2019;85:105845.  
9 661 doi:10.1016/j.cct.2019.105845  
10  
11 662 43. Hirschman KB, Bowles KH, Garcia-Gonzalez L, et al. Lessons learned from the  
12 663 implementation of a video health coaching technology intervention to improve self-  
13 664 care of family caregivers of adults with heart failure. *Res Nurs Health*.  
14 665 2021;44(1):250-259. doi:10.1002/nur.22100  
15  
16 666 44. Auld JP, Mudd JO, Gelow JM, Hiatt SO, Lee CS. Self-care Moderates the  
17 667 Relationship Between Symptoms and Health-Related Quality of Life in Heart  
18 668 Failure. *J Cardiovasc Nurs*. 2018;33(3):217-224.  
19 669 doi:10.1097/JCN.0000000000000447  
20  
21 670 45. Sedlar N, Lainscak M, Mårtensson J, Strömberg A, Jaarsma T, Farkas J. Factors  
22 671 related to self-care behaviours in heart failure: A systematic review of European  
23 672 Heart Failure Self-Care Behaviour Scale studies. *Eur J Cardiovasc Nurs*.  
24 673 2017;16(4):272-282. doi:10.1177/1474515117691644  
25  
26  
27 674  
28 675  
29 676  
30 677  
31 678  
32  
33  
34  
35  
36  
37  
38  
39  
40  
41  
42  
43  
44  
45  
46  
47  
48  
49  
50  
51  
52  
53  
54  
55  
56  
57  
58  
59  
60

679 **TABLES**

680

681

682

683

684

685

686

687

688

689 **Table 1.** Demographic and clinical characteristics of the patients.

| Variable                                     | N=20        |
|----------------------------------------------|-------------|
| Age, years, mean (SD)                        | 72.5 (11.4) |
| Range (minimum-maximum)                      | 38-85       |
| Gender, male, N (%)                          | 13 (65.0)   |
| Time since diagnosis, years, mean (SD)       | 2.35 (2.9)  |
| Recent diagnosis (less than 2 months), N (%) | 2 (10.0)    |
| NYHA, N (%)                                  |             |
| I                                            | 4 (20.0)    |
| II                                           | 7 (35.0)    |
| III                                          | 9 (45.0)    |
| LVEF, %, mean (SD)                           | 31.1 (6.0)  |
| Diabetes, type 2, N (%)                      | 9 (45.0)    |

690

691 *LVEF, left ventricular ejection fraction; NYHA, New York Heart Association; SD, standard*  
692 *deviation.*

693

694 **Table 2.** Domains and main perceptions among HFrEF patients.

| Domains                                                  | Patients and caregivers' quotes                                                                                                                                                                                                                                                                                                                                                                                                                                                                                                                                                                                                                                                   |
|----------------------------------------------------------|-----------------------------------------------------------------------------------------------------------------------------------------------------------------------------------------------------------------------------------------------------------------------------------------------------------------------------------------------------------------------------------------------------------------------------------------------------------------------------------------------------------------------------------------------------------------------------------------------------------------------------------------------------------------------------------|
| <b>Domain 1. Meanings related to QoL</b>                 |                                                                                                                                                                                                                                                                                                                                                                                                                                                                                                                                                                                                                                                                                   |
| <i>Attachment to previous routines</i>                   | <p>"This has split my old age in two, having many things to do and not being able to do them because you get very tired. I miss that freedom that I had. Now I feel tied." [1-1]</p> <p>"What I have missed the most is driving, I spent 20 years as a taxi driver." [2-1]</p> <p>"For me quality of life means to go wherever you want, to do strange things." [2-4]</p> <p>"I have always solved the problems that arised, but now I feel impotence because I can't do this anymore." [2-8]</p>                                                                                                                                                                                 |
| <i>Fears of progression</i>                              | <p>"The symptoms depend on the day, they are not permanent, some days you are tired, others not." [2-2]</p> <p>"Before I went out to the country with my dog, and I liked to go out with the bike but I can't anymore, I have to depend on a cane." [2-4]</p> <p>"I was in a good, well-paid job and I liked it, but when this happened, I completely disconnected." [2-8]</p>                                                                                                                                                                                                                                                                                                    |
| <i>Filling out PROM questionnaires</i>                   | <p>"Are you sure of the answer? You barely can walk without taking a break after a few minutes... Are you sure about "rarely"? You feel down quite often" [caregiver of NYHA III patient 2-4].</p> <p>"I will help you, mom, you must answer within the suggested scale, from mild to severe... Mild is not what you have here, you have moderate problems to get up or go for a long walk... this other one is not mild either, I've noticed that you frequently feel anxious and sadder than before... Are you sure about this number on the scale? Why do you say 80 out of 100? You are not that OK, mom; I wish you would be that OK" [caregiver of NYHA I patient 1-10]</p> |
| <b>Domain 2. Caregivers' roles</b>                       |                                                                                                                                                                                                                                                                                                                                                                                                                                                                                                                                                                                                                                                                                   |
| <i>Tracking at home</i>                                  | "I keep track of pressure, weight, urine. Every day. I have it written down here in the notebook and I also send it through the hospital's APP. But I really don't know if it is of much use. When I had to call the ambulance everything seemed normal, I kept a similar record in recent days." [caregiver of NYHA III patient 1-6]                                                                                                                                                                                                                                                                                                                                             |
| <i>Medical appointments</i>                              | <p>"When we go to the hospital the doctors ask him if he sleeps well or if he is drowning and he always answers that he is fine, but he is not. The last time he had been sleeping on the couch because he couldn't sleep in bed even with 3 pillows. That's why I always go to the controls with him." [caregiver of NYHA III patient 2-4]</p> <p>"Doctor, he says that he feels OK, but I noticed that he is more anxious, more obsessed about how many times he goes to pee per day. Most days he gets up and cannot sleep worrying about his condition" [caregiver of NYHA III patient 1-6]</p>                                                                               |
| <b>Domain 3. Relationships with healthcare providers</b> |                                                                                                                                                                                                                                                                                                                                                                                                                                                                                                                                                                                                                                                                                   |
| <i>Commitment</i>                                        | "I come to the very dedicated medical consultations and with the certainty that I am more closely watched than a Ferrari" [2-5]                                                                                                                                                                                                                                                                                                                                                                                                                                                                                                                                                   |
| <i>Trustworthiness</i>                                   | <p>"I sit in a consultation where they take their time, and they answer all my doubts. The big difference is that now I feel more secure, I know that I must deal with weight, urine, food. Having the possibility of calling them 24 hours a day gives you more peace of mind." [2-6]</p> <p>"The nurse is better than any cardiologist, everyone loves her." [2-5]</p> <p>"The nurse is very close, I think they have chosen a person with a character and attitude that is just what a patient needs." [2-6]</p>                                                                                                                                                               |

695

696

697

698 **Table 3.** Evaluation of health status by PROMs. Scores for EQ-5D-5L and KCCQ.

|                                                                                 | NYHA I-II<br>(N=11) | NYHA III<br>(N=9) | All NYHA<br>(N=20) |
|---------------------------------------------------------------------------------|---------------------|-------------------|--------------------|
| EQ-5D-5L, patients reporting any limitation <sup>1</sup> , N (%)                |                     |                   |                    |
| Mobility                                                                        | 5 (40.5)            | 9 (100)           | 14 (70.0)          |
| Self-care                                                                       | 0                   | 7 (77.8)          | 7 (35.0)           |
| Usual activities                                                                | 4 (36.4)            | 8 (88.9)          | 12 (60.0)          |
| Pain/Discomfort                                                                 | 4 (36.4)            | 6 (66.7)          | 10 (50.0)          |
| Anxiety/Depression                                                              | 4 (36.4)            | 8 (88.9)          | 12 (60.0)          |
| EQ-5D-5L, patients reporting severe or extreme limitations <sup>2</sup> , N (%) |                     |                   |                    |
| Mobility                                                                        | 0                   | 5 (55.6)          | 5 (25.0)           |
| Self-care                                                                       | 0                   | 2 (22.2)          | 2 (10.0)           |
| Usual activities                                                                | 0                   | 3 (33.3)          | 3 (15.0)           |
| Pain/Discomfort                                                                 | 1 (9.1)             | 2 (22.2)          | 3 (15.0)           |
| Anxiety/Depression                                                              | 0                   | 2 (22.2)          | 2 (10.0)           |
| EQ-5D-5L global, mean (SD)                                                      |                     |                   |                    |
| Index value                                                                     | 0.85 (0.17)         | 0.37 (0.36)       | 0.64 (0.36)        |
| VAS score                                                                       | 74.55 (23.50)       | 45.56 (14.46)     | 61.50 (24.45)      |
| KCCQ, mean (SD)                                                                 |                     |                   |                    |
| Physical limitation                                                             | 81.06 (19.04)       | 39.72 (26.59)     | 62.46 (30.56)      |
| Symptom stability                                                               | 59.10 (12.61)       | 66.67 (30.62)     | 62.50 (22.21)      |
| Symptom frequency                                                               | 84.66 (17.14)       | 57.64 (27.14)     | 72.50 (25.59)      |
| Symptom burden                                                                  | 91.67 (11.18)       | 61.11 (24.30)     | 77.92 (23.61)      |
| Self-efficacy                                                                   | 94.32 (10.25)       | 85.94 (18.22)     | 90.79 (14.34)      |
| Quality of life                                                                 | 82.58 (13.15)       | 33.33 (20.83)     | 60.42 (30.09)      |
| Social limitation                                                               | 85.61 (14.02)       | 31.94 (26.62)     | 61.46 (33.94)      |
| KCCQ global scores, mean (SD)                                                   |                     |                   |                    |
| Overall summary                                                                 | 82.69 (9.81)        | 41.09 (20.55)     | 63.97 (26.06)      |
| Clinical summary                                                                | 81.30 (10.82)       | 49.55 (22.31)     | 67.01 (23.10)      |
| Total symptom                                                                   | 81.54 (10.85)       | 59.37 (23.50)     | 71.56 (20.55)      |

699 <sup>1</sup>Any score but 1 (no problems).700 <sup>2</sup> Only patients scoring 4 or 5 in each domain.

701 EQ-5D-5L, EuroQoL 5D-5L questionnaire; KCCQ, Kansas City Cardiomyopathy  
 702 Questionnaire; NYHA, New York Heart Association; PRO, patient-reported outcome;  
 703 SD, standard deviation; VAS, visual analogue scale.

704

705

706

**SUPPLEMENTARY MATERIALS**

for

**Quality of life and disease experience in patients with heart failure with reduced ejection fraction in Spain:  
a mixed methods approach to go beyond standardized data**

by Raúl Rubio et al.

---

**1. Semi-structured interview guideline (p. 2)****2. Observation guideline for medical visits (p. 9)**

For peer review only

## 1. SEMI-STRUCTURED INTERVIEW GUIDELINE [Notes for RESEARCHER in blue].

### Presentation

Thank you for taking part in this interview.

Please note that:

- Your responses are confidential and anonymous. Under no circumstances will your personal data be shared when the results are published. All answers will be treated in aggregate form.
- A Piece of Pie complies with all European and North American data protection laws and complies with the guidelines set by the EphMRA (European Pharmaceutical Market Research Association) codes of conduct for market research.
- You may discontinue your participation in this research at any time and, as well as the right not to answer any questions you do not wish to answer.

With your permission, we will audio record your responses to facilitate our analysis.

*[RESEARCHER: Start recording audio.]*

I will now introduce myself. My name is [XXX], I work for A Piece of Pie, an innovation consulting firm.

We are currently conducting a study on behalf of a pharmaceutical company, which would like to better understand the experience of patients suffering from Heart Failure.

We would be very grateful if you could share with us your personal experience and help us identify areas for improvement throughout your experience, from the moment of the first symptoms to the present.

Please note that there are no right or wrong answers, as we are interested in your opinions and your personal experience with the condition.

## The interview (90 min.)

*RESEARCHER: Tailor the questions to the way the patient refers to the disease and use the term provided by the patient to make him/her feel more comfortable. Whenever you believe that the caregiver could provide us with additional information on any of the topics discussed, please direct questions to him/her as well. If, on the other hand, you have the impression that it will be more valuable to ask certain questions only to the caregiver, do so after the interview with the patient. Always ask the patient for permission before talking to the caregiver.*

| Exploration area         | 1. KNOW THE PATIENT (15 min)                                                                                                                                                                                |
|--------------------------|-------------------------------------------------------------------------------------------------------------------------------------------------------------------------------------------------------------|
| Goals                    | <ul style="list-style-type: none"> <li>• Generate a relationship with the patient</li> <li>• Better understand the person and their context</li> <li>• Understand your daily habits and routines</li> </ul> |
| Ethnographic explanation | <i>To begin with, I would like to get to know you as a person and familiarize myself with your personal situation...</i>                                                                                    |

1. **Person:** I would like you to introduce yourself and explain to me:
  - a) How old are you? Who do you live with?
  - b) Tell me a little more about yourself, what do you like to do? What are your hobbies? What do you do? What do you value most now in your life? Why?
2. **Self-description:** If you were to describe yourself, what 3 words would you use? What comes to mind when you think of yourself?
3. **The patient's day-to-day life:** Tell me what a "typical" day looks like. What do you do from the time you wake up until you go to sleep? Differentiate weekday from weekends (i.e., hobbies). *RESEARCHER: be sure they explain their day to day routines to be able to refer to them later when exploring the impact of the disease. Write down on post-its moments with the greatest impact.*
  - a) What time of day would you say you like best? When do you feel most at ease? Why?
  - b) And what moment do you like the least? Why?
  - c) What things do you have the hardest time doing?
  - d) Is there anything you've had to give up in recent times? What do you miss?
4. **Outside view:** What do you think a good friend of yours or family member would say to me if I asked them what [patient's name] is like?
5. **Values:** If you were to tell a young family member what is most important in life, what would you say to them? Do you have any kind of personal "maxim"? Why do you think it's important? *[RESEARCHER: If health-related issues arise, ask when it became important to have a healthy life in your family and/or social environment]*

|                          |                                                                                                                                                                                          |
|--------------------------|------------------------------------------------------------------------------------------------------------------------------------------------------------------------------------------|
| Exploration area         | <b>2. MEANING OF QUALITY OF LIFE (15 min)</b>                                                                                                                                            |
| Goals                    | <ul style="list-style-type: none"> <li>• Understand what they associate to quality of life</li> <li>• Understand the impact of different HF symptoms on their quality of life</li> </ul> |
| Ethnographic explanation | <i>Now I would like us to talk about those things that for you represent quality of life.</i>                                                                                            |

6. **Quality of Life.** Definition: Now that you have completed this map, how would you define quality of life?
- What things allow you to have quality of life? How do you feel about them?
  - What other things keep you from having a better quality of life? How do you feel about them?
7. **Current feeling:** How do you feel at this moment in your life? Do you have any small rituals that help you in your day to day? *RESEARCHER: Ask about eating habits, physical activity, cultural activities, etc.*
- Is there anything that particularly bothers you? Could you give me an example?
  - What makes you happy?
  - If you could improve 3 things from your day to day, what things would you choose? What would you give up?

|                          |                                                                                                                                                            |
|--------------------------|------------------------------------------------------------------------------------------------------------------------------------------------------------|
| Exploration area         | <b>3. HEART FAILURE (15 min)</b>                                                                                                                           |
| Goals                    | <ul style="list-style-type: none"> <li>• Understand the impact of HF on the patient's life</li> <li>• Understand the patient's perception of HF</li> </ul> |
| Ethnographic explanation | <i>Now I would like you to tell me specifically about the disease you suffer...</i>                                                                        |

8. **HF:** I would like you to explain to me in your own words how do you see heart failure.
9. **Explanation of the disease:** Do you remember how they explained to you what HF was? What words did they use? Who did so? Could it have been done better? What did they miss?
10. **Living with HF:** What is it like to live with HF? When do you feel it becomes more "uphill"? What helps you overcome it?
11. **Other diagnoses:** Are you diagnosed with other diseases? Were they prior to HF? Are they related in any way?



|                          |                                                                                                                                                            |
|--------------------------|------------------------------------------------------------------------------------------------------------------------------------------------------------|
| Exploration area         | <b>4. LIFE JOURNEY (15 min)</b>                                                                                                                            |
| Goals                    | <ul style="list-style-type: none"> <li>• Understand the impact of HF on the patient's life</li> <li>• Understand the patient's perception of HF</li> </ul> |
| Ethnographic explanation | <i>To continue I would like us to briefly talk about the most important moments with the disease ...</i>                                                   |

12. **Significant moments with the disease:** Now I would like you to think about 5-6 significant moments since you were diagnosed with the disease. *RESEARCHER: Write down every moment in a post-it. Pay attention to whether hospitalization, transplant or heart attack arise spontaneously and if not, ask if you have experienced any of these moments and if so write them down next to the other moments.*
- Why have you precisely chosen these moments?
  - How did you experience each of these moments?
  - Which one of them was the best moment for you? *RESEARCHER: Ask what "the best" means to this patient*
  - Which one of them was the worst moment for you? *RESEARCHER: Ask what "the worst" means and, if it is related to the patient's illness, ask: → Is there anything that could have better helped you cope during those times?*
  - Which of these moments changed your life the most? Why?
13. **Life before HF:** What was your life like before you were diagnosed with HF? What things have changed the most? What do you miss?
- Since you were diagnosed... how has your lifestyle changed? How do you feel about it? What could help you?
  - At the beginning of the interview, you explained to me what a day in your life looks like. How would this change if life were the way it used to be?
  - Could you specify how you think the disease changed your life? *[RESEARCHER: dig into issues such as new interpretations of reality, changes in values, etc.]*

|                          |                                                                                                                                                                                                                          |
|--------------------------|--------------------------------------------------------------------------------------------------------------------------------------------------------------------------------------------------------------------------|
| Exploration area         | <b>5. CARE AND EMOTIONAL PROCESS (20 min.)</b>                                                                                                                                                                           |
| Goals                    | <ul style="list-style-type: none"> <li>• Understand the HF Patient Journey</li> <li>• Identify unmet needs</li> <li>• Understand the perception of the different treatments that the patient has gone through</li> </ul> |
| Ethnographic explanation | <i>Now I would like us to delve into the journey you have followed since the beginning of the risk factors until now...</i>                                                                                              |

Let's assume that you meet a person who has just been diagnosed with heart failure and does not know what it means to suffer from this condition. If you asked him to tell you about your experience, from the first symptoms until today

14. **Life without the disease:** What was your life like before the disease? If you look back, what do you miss the most?
15. **Previous diseases:** What diseases have you been diagnosed with? Who diagnosed you?
  - a) Were you warned of the risk of developing heart failure?
  - b) What did they explain to you?
  - c) Were you advised to make lifestyle changes? *RESEARCHER, ask about exercise, diet, tobacco, or alcohol consumption...*
  - d) Were you given any preventive treatment?
16. **First symptoms:**
  - a) What changes did you experience that made you think something was wrong? For how long?
  - b) What did you think might be going on?
17. **Diagnosis:**
  - a) Do you remember what was explained to you?
  - b) What tests have you done? Was the process burdensome?
  - c) What doubts did you have?
  - d) What did you think was going to happen at the time?
  - e) Did you search for information on the internet?
  - f) Did you contact any patient associations?
  - g) Have you met anyone with this condition during the process? How has it affected you?
18. **First treatment:**
  - a) Do you remember the name of your treatment?
  - b) How was the first medication taken?
  - c) Did you have any routines to do so?
  - d) Did you stop taking the treatment at some point?
19. **Follow-up visits:**
  - a) What were the routines of the visits like?

- b) Was it hard for you to make them? Currently, how do you feel when you must go to the doctor?
20. **Evolution of the disease:**
- a) How did you find out that the disease was changing? Were there any significant moments?
21. **Hospital admission (if applies):**
- a) What was the process like? How many days last the hospital admission?
- b) How was the experience in the emergency room?
- c) Have you had more than one hospital admission?
22. **Surgery (if applies):**
- a) What kind of device was implanted? Would you be able to explain how it works?
- b) What things does it allow you to do that you couldn't do before? How does this make you feel?
- c) What things can't you do now? How does this make you feel?
23. **Experience PROM questionnaires:** before the interview you answered a set of questionnaires about your symptoms and quality of life.
- a) From what we talked about during the interview, what things do you think should be included in these questionnaires?
- b) What things should your cardiologist know to make decisions?

| Exploration area         | 6. HOME TOUR (10 min.)                                                                                                                                                                                                                                                      |
|--------------------------|-----------------------------------------------------------------------------------------------------------------------------------------------------------------------------------------------------------------------------------------------------------------------------|
| Goals                    | <ul style="list-style-type: none"> <li>• Complement and contrast the information obtained during the interview with the patient's environment.</li> <li>• Understand the immediate context in which patients live (routines, rituals, and concessions to the HF)</li> </ul> |
| Ethnographic explanation | <i>For us it would be very useful to be able to understand how the disease affects your day to day. If you could show us your house, please, I'm sure it would help us understand...</i>                                                                                    |

*RESEARCHER: The home visit should be made at the appropriate time during the interview. It should be done naturally as a continuation of the conversation: asking for places and things inside the house (medicines, refrigerator, sofa, bedroom) that are important in terms of the impact that HF has on your life be shown.*

*For instance, ask whether there has been any home reform since they have had HF diagnosed. As you walk around, ask the patient about their daily routines and their life under treatment. Try to understand how the patient has adapted his/her life to the disease and his/her level of activity.*

*If the participant does not mention anything spontaneously, focus on:*

- Evidence that signals his/her 'lifestyle', hobbies.
- Written information about HF.
- Evidence of contact with HCPs.

- *Rooms where she/he takes treatment or workout.*
- *Rooms where medicines are stored.*

*Please, contrast the information mentioned during the interview with what you observe in the house. If allowed by the participant, take pictures of everything the patient deems relevant to treatment and their life with HF.*

With this we would conclude the interview. Thank you very much for your time and participation. Do you have any comments or questions you want to share?

**[END RECORDING]**

For peer review only

## 2. OBSERVATION GUIDE OF MEDICAL APPOINTMENTS WITH HCPS

This guide is intended to guide the observation before, during and after the medical visit of selected patients. During the appointment, neither the patient nor the doctor will be asked questions by the researcher.

The objectives of the visit are:

1. Observe whether which topics are discussed during the medical appointment, and whether any of them is directly related to quality of life with the condition.
2. Understand the language that is used by both parties when talking about the condition.

*RESEARCHER, prior to the visit, make sure that the patient understands the purpose of the observation within the study.*

### I – PRE-VISIT: Observation of the hospital environment

*RESEARCHER, indicate the center, scheduled time of the visit and the start time of the observation.*

*Begin by observing the **hospitals environment**. What surprises you the most? Why?*

*Focus on:*

- Occupancy of the center: number of patients in the waiting room, number of health workers.
- Space: design, decoration, lighting, colors, atmosphere.
- Organization: Allocation and ease of access.

*Observe the **interviewee**. What does he/she look like? (For example, tired, relaxed, irritated, etc.) Is there anything that stands out? Inquire about your expectations before the visit.*

*Focus on:*

- Arrival time, ease of access, companions (if applies).
- Body posture and non-verbal signs (facial expression, comfort level with the accompanying situation).
- Preparation for the visit: if the patient brings documents, medical tests, notebooks or tracking applications.
- Waiting times for the visit.
- If applies: Interaction with other health agents (residents, reception, nursing).

### II – DURING THE VISIT: Observation of the patient medical interaction

*RESEARCHER: Describe the physical space, organization, and arrangement of furniture. Also write down the exact time of the start of the visit.*

*Focus on:*

- Initial time of the visit.
- Initial greeting, use of gestures and non-verbal cues.
- Initial conversation. How general are they? How specific?
  - Questions from the doctor, order, and type.

- On quality of life and/or impact of HF on a day-to-day basis.
    - Type of assessment and use of questionnaires.
    - Types of recommendations (functional, social, quality of life).
    - How the patient responds.
  - Questions from the patient, order, and type.
    - On quality of life and/or impact of HF on a day-to-day basis.
    - How your doctor responds
- Central conversation:
  - Topics of conversation that arouse greater patient attention (e.g., quality of life, impact on daily activity).
  - Topics of conversation that arouse greater attention from the doctor (e.g., clinical, psychological, or social, quality of life or other aspects).
  - Dominant language; use of colloquial language vs medical language.
- Body posture, proxemics and physical distance from the patient and the doctor during the visit.
- Use of silences and non-verbal gestures (gestures of approval, doubt, or confusion).
- Closing of the visit
  - Time and language used for the closing of the visit.
  - Approach of next steps by the doctor and the patient.
  - Farewell, use of gestures and non-verbal cues.
- If applies: interaction with other health agents (residents, receptionist, nursing).

### III – AFTER THE VISIT: Observation of the patient

*RESEARCHER: Write down the exact **time of the end** of the visit. Accompany the patient at the exit of the visit and / or another instance of contact related to the visit (reception desks). If possible, know your perception about the results of the visit.*

*Focus on:*

- End time/duration of the visit.
- The patient's body posture and non-verbal gestures.
- Language used to assess the visit.
- If applies: interaction with other health agents (residents, reception, nursing).

End of observation.\*\*\*

## ETHNOQOL – COREQ CHECKLIST

5 October 2021

| No.                                            | Item                                     | Description                                                                                                                                                                                                          | Section #                             |
|------------------------------------------------|------------------------------------------|----------------------------------------------------------------------------------------------------------------------------------------------------------------------------------------------------------------------|---------------------------------------|
| <b>Domain 1: Research team and reflexivity</b> |                                          |                                                                                                                                                                                                                      |                                       |
| Personal characteristics                       |                                          |                                                                                                                                                                                                                      |                                       |
| 1.                                             | Interviewer/facilitator                  | Which author/s conducted the interview or focus group?<br>SCC<br>MFE                                                                                                                                                 | Line 201                              |
| 2.                                             | Credentials                              | What were the researcher's credentials? <i>E.g.</i><br><i>PhD, MD</i><br>SCC, PhD<br>MFE, BA                                                                                                                         | NA                                    |
| 3.                                             | Occupation                               | What was their occupation at the time of the study?<br>Senior researchers                                                                                                                                            | Line 201                              |
| 4.                                             | Gender                                   | Was the researcher male or female?<br>Female                                                                                                                                                                         | Line 201                              |
| 5.                                             | Experience and training                  | What experience or training did the researcher have?<br>>5 years of experience in medical sociology and medical anthropology                                                                                         | Line 202                              |
| Relationship with participants                 |                                          |                                                                                                                                                                                                                      |                                       |
| 6.                                             | Relationship established                 | Was a relationship established prior to study commencement?<br>No.                                                                                                                                                   | Line 204                              |
| 7.                                             | Participant knowledge of the interviewer | What did the participants know about the researcher? <i>E.g. Personal goals, reasons for doing the research</i><br>Research goals                                                                                    | Line 205                              |
| 8.                                             | Interviewer characteristics              | What characteristics were reported about the interviewer/facilitator? <i>E.g. Bias, assumptions, reasons and interests in the research topic</i><br>None.                                                            | NA                                    |
| <b>Domain 2: Study design</b>                  |                                          |                                                                                                                                                                                                                      |                                       |
| Theoretical framework                          |                                          |                                                                                                                                                                                                                      |                                       |
| 9.                                             | Methodological orientation and theory    | What methodological orientation was stated to underpin the study? <i>E.g. grounded theory, discourse analysis, ethnography, phenomenology, content analysis</i><br>Thematic analysis<br>Phenomenological perspective | Lines 150-161, and section on Methods |
| Participant selection                          |                                          |                                                                                                                                                                                                                      |                                       |
| 10.                                            | Sampling                                 | How were participants selected? <i>E.g. purposive, convenience, consecutive, snowball</i><br>Purposeful                                                                                                              | Line 194                              |
| 11.                                            | Method of approach                       | How were participants approached? <i>E.g. face-to-face, telephone, mail, email</i>                                                                                                                                   | Lines 186-196                         |

|                                        |                                |                                                                                                                                                            |                                       |
|----------------------------------------|--------------------------------|------------------------------------------------------------------------------------------------------------------------------------------------------------|---------------------------------------|
|                                        |                                | <i>face-to-face</i>                                                                                                                                        |                                       |
| 12.                                    | Sample size                    | How many participants were in the study?<br><b>20</b>                                                                                                      | Line 194<br>and 287                   |
| 13.                                    | Non-participation              | How many people refused to participate or dropped out? What were the reasons for this?<br><b>None</b>                                                      | Lines 186-<br>294                     |
| <b>Setting</b>                         |                                |                                                                                                                                                            |                                       |
| 14.                                    | Setting of data collection     | Where was the data collected? <i>E.g. home, clinic, Workplace</i><br><b><i>Patients' home</i></b>                                                          | Lines 198-<br>232                     |
| 15.                                    | Presence of non-participants   | Was anyone else present besides the participants and researchers?<br><b>No.</b>                                                                            | Lines 198-<br>232                     |
| 16.                                    | Description of sample          | What are the important characteristics of the sample? <i>E.g. demographic data, date</i><br><b><i>demographic data and clinic characteristics</i></b>      | Lines 286-<br>294 and<br>Table 1      |
| <b>Data collection</b>                 |                                |                                                                                                                                                            |                                       |
| 17.                                    | Interview guide                | Were questions, prompts, guides provided by the authors? Was it pilot tested?<br><b>Yes. No pilot tested.</b>                                              | See<br>Suppleme<br>ntary<br>Materials |
| 18.                                    | Repeat interviews              | Were repeat interviews carried out? If yes, how many?<br><b>No.</b>                                                                                        | NA                                    |
| 19.                                    | Audio/visual recording         | Did the research use audio or visual recording to collect the data?<br><b>Yes, audio recording.</b>                                                        | Lines 229-<br>232                     |
| 20.                                    | Field notes                    | Were field notes made during and/or after the interview or focus group?<br><b>During interviews and after direct observations of medical appointments.</b> | Lines 229-<br>232                     |
| 21.                                    | Duration                       | What was the duration of the interviews or focus group?<br><b>90 min for interviews and 20 min for clinical encounters.</b>                                | Line 206,<br>222                      |
| 22.                                    | Data saturation                | Was data saturation discussed?<br><b>Yes, in joint analysis sessions with authors.</b>                                                                     | Line 280                              |
| 23.                                    | Transcripts returned           | Were transcripts returned to participants for comment and/or correction?<br><b>No.</b>                                                                     | NA                                    |
| <b>Domain 3: analysis and findings</b> |                                |                                                                                                                                                            |                                       |
| <b>Data analysis</b>                   |                                |                                                                                                                                                            |                                       |
| 24.                                    | Number of data coders          | How many data coders coded the data?<br><b>The two field researchers</b>                                                                                   | Line 270                              |
| 25.                                    | Description of the coding tree | Did authors provide a description of the coding tree?<br><b>Authors provided the description of domains, no coding tree.</b>                               | Lines 267-<br>279                     |
| 26.                                    | Derivation of themes           | Were themes identified in advance or derived from the data?<br><b>Derived from data.</b>                                                                   | Lines 267-<br>279                     |



|           |                              |                                                                                                                                                         |                                         |
|-----------|------------------------------|---------------------------------------------------------------------------------------------------------------------------------------------------------|-----------------------------------------|
| 27.       | Software                     | What software, if applicable, was used to manage the data?<br><b>No.</b>                                                                                | <b>NA</b>                               |
| 28.       | Participant checking         | Did participants provide feedback on the findings?<br><b>No.</b>                                                                                        | <b>NA</b>                               |
| Reporting |                              |                                                                                                                                                         |                                         |
| 29.       | Quotations presented         | Were participant quotations presented to illustrate the themes / findings? Was each quotation identified? <i>E.g. Participant number</i><br><b>Yes.</b> | <b>Table 2</b>                          |
| 30.       | Data and findings consistent | Was there consistency between the data presented and the findings?<br><b>Yes, in joint analysis sessions.</b>                                           | <b>Lines 267-279</b>                    |
| 31.       | Clarity of major themes      | Were major themes clearly presented in the findings?<br><b>Yes, in joint analysis sessions.</b>                                                         | <b>See Results section</b>              |
| 32.       | Clarity of minor themes      | Is there a description of diverse cases or discussion of minor themes?<br><b>Yes.</b>                                                                   | <b>Yes, Table 2 and Results section</b> |

# BMJ Open

## Quality of life and disease experience in patients with heart failure with reduced ejection fraction in Spain: a mixed-methods study

|                               |                                                                                                                                                                                                                                                                                                                                                                                                                                                                                                                                                                                                                                                                                                                                                                                                                                                                                                                                                                                                                                                                                                                                                                                                                                                                                                                                                                                                                                                                                                                                                                                                                                                                                                                                                                                                                                                                                                                                                                                                                                                                                                                                                                                                                                                                                                                                                                                                                       |
|-------------------------------|-----------------------------------------------------------------------------------------------------------------------------------------------------------------------------------------------------------------------------------------------------------------------------------------------------------------------------------------------------------------------------------------------------------------------------------------------------------------------------------------------------------------------------------------------------------------------------------------------------------------------------------------------------------------------------------------------------------------------------------------------------------------------------------------------------------------------------------------------------------------------------------------------------------------------------------------------------------------------------------------------------------------------------------------------------------------------------------------------------------------------------------------------------------------------------------------------------------------------------------------------------------------------------------------------------------------------------------------------------------------------------------------------------------------------------------------------------------------------------------------------------------------------------------------------------------------------------------------------------------------------------------------------------------------------------------------------------------------------------------------------------------------------------------------------------------------------------------------------------------------------------------------------------------------------------------------------------------------------------------------------------------------------------------------------------------------------------------------------------------------------------------------------------------------------------------------------------------------------------------------------------------------------------------------------------------------------------------------------------------------------------------------------------------------------|
| Journal:                      | <i>BMJ Open</i>                                                                                                                                                                                                                                                                                                                                                                                                                                                                                                                                                                                                                                                                                                                                                                                                                                                                                                                                                                                                                                                                                                                                                                                                                                                                                                                                                                                                                                                                                                                                                                                                                                                                                                                                                                                                                                                                                                                                                                                                                                                                                                                                                                                                                                                                                                                                                                                                       |
| Manuscript ID                 | bmjopen-2021-053216.R2                                                                                                                                                                                                                                                                                                                                                                                                                                                                                                                                                                                                                                                                                                                                                                                                                                                                                                                                                                                                                                                                                                                                                                                                                                                                                                                                                                                                                                                                                                                                                                                                                                                                                                                                                                                                                                                                                                                                                                                                                                                                                                                                                                                                                                                                                                                                                                                                |
| Article Type:                 | Original research                                                                                                                                                                                                                                                                                                                                                                                                                                                                                                                                                                                                                                                                                                                                                                                                                                                                                                                                                                                                                                                                                                                                                                                                                                                                                                                                                                                                                                                                                                                                                                                                                                                                                                                                                                                                                                                                                                                                                                                                                                                                                                                                                                                                                                                                                                                                                                                                     |
| Date Submitted by the Author: | 27-Oct-2021                                                                                                                                                                                                                                                                                                                                                                                                                                                                                                                                                                                                                                                                                                                                                                                                                                                                                                                                                                                                                                                                                                                                                                                                                                                                                                                                                                                                                                                                                                                                                                                                                                                                                                                                                                                                                                                                                                                                                                                                                                                                                                                                                                                                                                                                                                                                                                                                           |
| Complete List of Authors:     | <p>Rubio, Raül; A Piece of Pie SL<br/> Palacios, Beatriz; AstraZeneca Farmaceutica Spain SA, Medical<br/> Varela, Luis; AstraZeneca Farmaceutica Spain SA, Medical<br/> Fernández de la Fundación, Raquel; AstraZeneca Farmaceutica Spain SA, Medical<br/> Camargo Correa, Selene; A Piece of Pie SL<br/> Estupiñan, María Fernanda; A Piece of Pie SL<br/> Calvo, Elena; Bellvitge University Hospital, Cardiology and Heart Failure Program; Bellvitge Institute for Biomedical Research, BIO-HEART Cardiovascular Diseases Research Group<br/> José, Nuria; Bellvitge University Hospital, Cardiology and Heart Failure Program; Bellvitge Institute for Biomedical Research, BIO-HEART Cardiovascular Diseases Research Group<br/> Ruiz Muñoz, Marta; Bellvitge University Hospital, Cardiology and Heart Failure Program; Bellvitge Institute for Biomedical Research, BIO-HEART Cardiovascular Diseases Research Group<br/> Yun, Sergi; Bellvitge University Hospital, Cardiology and Heart Failure Program; Bellvitge Institute for Biomedical Research, BIO-HEART Cardiovascular Diseases Research Group<br/> Jiménez-Marrero, Santiago; Bellvitge University Hospital, Cardiology and Heart Failure Program; Bellvitge Institute for Biomedical Research, BIO-HEART Cardiovascular Diseases Research Group<br/> Alcoberro, Lidia; Bellvitge University Hospital, Cardiology and Heart Failure Program; Bellvitge Institute for Biomedical Research, BIO-HEART Cardiovascular Diseases Research Group<br/> Garay, Alberto; Bellvitge University Hospital, Cardiology and Heart Failure Program; Bellvitge University Hospital, Cardio-Oncology Unit<br/> Moliner, Pedro; Bellvitge University Hospital, Cardiology and Heart Failure Program; Bellvitge University Hospital, Cardio-Oncology Unit<br/> Sánchez-Fernández, Lydia; Bellvitge University Hospital, Cardiology and Heart Failure Program; Bellvitge University Hospital, Cardio-Oncology Unit<br/> Soria Gómez, María Teresa; Puerta de Hierro University Hospital of Majadahonda, Heart Failure Unit<br/> Hidalgo, Encarna; Bellvitge University Hospital, Cardiology and Heart Failure Program; Bellvitge Institute for Biomedical Research, BIO-HEART Cardiovascular Diseases Research Group<br/> Enjuanes, C; Bellvitge University Hospital, Cardiology and Heart Failure Program; Bellvitge Institute for Biomedical Research, BIO-HEART</p> |

|                                    |                                                                                                                                                                                                                                                                                                                                                                                                                                                                                                                                                                                                                                                                                                                                                                                                                                                                                                             |
|------------------------------------|-------------------------------------------------------------------------------------------------------------------------------------------------------------------------------------------------------------------------------------------------------------------------------------------------------------------------------------------------------------------------------------------------------------------------------------------------------------------------------------------------------------------------------------------------------------------------------------------------------------------------------------------------------------------------------------------------------------------------------------------------------------------------------------------------------------------------------------------------------------------------------------------------------------|
|                                    | Cardiovascular Diseases Research Group<br>Calero-Molina, Esther; Bellvitge University Hospital, Cardiology and Heart Failure Program; Bellvitge Institute for Biomedical Research, BIO-HEART Cardiovascular Diseases Research Group<br>Rueda, Yolanda; CardioAlianza<br>San Saturnino, Maite; CardioAlianza<br>Garcimartín, Paloma; Hospital del Mar, Outpatients Clinics; Hospital del Mar Institute for Medical Research, Biomedical Research in Heart Diseases<br>López-Ibor, Jorge; Puerta de Hierro University Hospital of Majadahonda, Cardiology<br>Segovia-Cubero, Javier; Puerta de Hierro University Hospital of Majadahonda, Cardiology; Carlos III Health Institute, CIBER of Cardiovascular Diseases<br>Comin-Colet, Josep; Bellvitge University Hospital, Cardiology and Heart Failure Program; Bellvitge Institute for Biomedical Research, BIO-HEART Cardiovascular Diseases Research Group |
| <b>Primary Subject Heading</b> :   | Qualitative research                                                                                                                                                                                                                                                                                                                                                                                                                                                                                                                                                                                                                                                                                                                                                                                                                                                                                        |
| <b>Secondary Subject Heading</b> : | Research methods, Cardiovascular medicine                                                                                                                                                                                                                                                                                                                                                                                                                                                                                                                                                                                                                                                                                                                                                                                                                                                                   |
| <b>Keywords</b> :                  | Heart failure < CARDIOLOGY, Quality in health care < HEALTH SERVICES ADMINISTRATION & MANAGEMENT, QUALITATIVE RESEARCH                                                                                                                                                                                                                                                                                                                                                                                                                                                                                                                                                                                                                                                                                                                                                                                      |
|                                    |                                                                                                                                                                                                                                                                                                                                                                                                                                                                                                                                                                                                                                                                                                                                                                                                                                                                                                             |

SCHOLARONE™  
Manuscripts



I, the Submitting Author has the right to grant and does grant on behalf of all authors of the Work (as defined in the below author licence), an exclusive licence and/or a non-exclusive licence for contributions from authors who are: i) UK Crown employees; ii) where BMJ has agreed a CC-BY licence shall apply, and/or iii) in accordance with the terms applicable for US Federal Government officers or employees acting as part of their official duties; on a worldwide, perpetual, irrevocable, royalty-free basis to BMJ Publishing Group Ltd ("BMJ") its licensees and where the relevant Journal is co-owned by BMJ to the co-owners of the Journal, to publish the Work in this journal and any other BMJ products and to exploit all rights, as set out in our [licence](#).

The Submitting Author accepts and understands that any supply made under these terms is made by BMJ to the Submitting Author unless you are acting as an employee on behalf of your employer or a postgraduate student of an affiliated institution which is paying any applicable article publishing charge ("APC") for Open Access articles. Where the Submitting Author wishes to make the Work available on an Open Access basis (and intends to pay the relevant APC), the terms of reuse of such Open Access shall be governed by a Creative Commons licence – details of these licences and which [Creative Commons](#) licence will apply to this Work are set out in our licence referred to above.

Other than as permitted in any relevant BMJ Author's Self Archiving Policies, I confirm this Work has not been accepted for publication elsewhere, is not being considered for publication elsewhere and does not duplicate material already published. I confirm all authors consent to publication of this Work and authorise the granting of this licence.

1  
2  
3 1 *Original research*  
4 2  
5 3  
6  
7 4

8  
9 **Quality of life and disease experience in patients with**  
10 **heart failure with reduced ejection fraction in Spain: a**  
11 **mixed-methods study**  
12  
13  
14  
15  
16  
17  
18

19 Raül Rubio,<sup>1</sup> Beatriz Palacios,<sup>2</sup> Luis Varela,<sup>2</sup> Raquel Fernández,<sup>2</sup> Selene Camargo  
20 Correa,<sup>1</sup> María Fernanda Estupiñan,<sup>1</sup> Elena Calvo,<sup>3,4</sup> Nuria José,<sup>3,4</sup> Marta Ruiz  
21 Muñoz,<sup>3,4</sup> Sergi Yun,<sup>3,4</sup> Santiago Jiménez-Marrero,<sup>3,4</sup> Lidia Alcoberro<sup>3,4</sup> Alberto  
22 Garay,<sup>3,5</sup> Pedro Moliner,<sup>3,5</sup> Lydia Sánchez-Fernández,<sup>3,5</sup> María Teresa Soria Gómez,<sup>6</sup>  
23 Encarna Hidalgo,<sup>3,4</sup> Cristina Enjuanes,<sup>3,4</sup> Esther Calero-Molina,<sup>3,4</sup> Yolanda Rueda,<sup>7</sup>  
24 Maite San Saturnino,<sup>7</sup> Paloma Garcimartín,<sup>8,9</sup> Jorge V. López-Ibor,<sup>10</sup> Javier Segovia-  
25 Cubero,<sup>11,12</sup> Josep Comin-Colet<sup>3,4,13</sup>  
26  
27  
28  
29  
30  
31  
32  
33  
34  
35

36 1. A Piece of Pie SL, Barcelona, Spain

37 2. Medical Department, AstraZeneca Farmacéutica Spain SA, Madrid, Spain

38 3. Cardiology Department and Heart Failure Program, Bellvitge University Hospital,  
39 Hospitalet de Llobregat, Barcelona, Spain

40 4. BIO-HEART Cardiovascular Diseases Research Group, Bellvitge Biomedical  
41 Research Institute (IDIBELL), Hospitalet de Llobregat, Barcelona, Spain

42 5. Cardio-Oncology Unit, Bellvitge University Hospital, Catalan Institute of Oncology,  
43 L'Hospitalet de Llobregat, Spain

44 6. Heart Failure Unit, Puerta de Hierro University Hospital, Majadahonda, Madrid,  
45 Spain

46 7. CardioAlianza, Barcelona, Spain

47 8. Outpatient Clinics, Hospital del Mar, Parc de Salut Mar, Barcelona, Spain  
48  
49  
50  
51  
52  
53  
54  
55  
56  
57  
58  
59  
60

- 1  
2  
3 29 9. Biomedical Research in Heart Diseases, Hospital del Mar, Medical Research  
4  
5 30 Institute (IMIM), Barcelona, Spain  
6  
7 31 10. Outpatient Heart Failure Clinic, Department of Cardiology, Puerta de Hierro  
8  
9 32 University Hospital, Majadahonda, Madrid, Spain  
10  
11 33 11. Department of Cardiology, Puerta de Hierro University Hospital, Majadahonda,  
12  
13 34 Madrid, Spain  
14  
15 35 12. CIBER of Cardiovascular Diseases, Carlos III Institute, Madrid, Spain  
16  
17 36 13. Department of Clinical Sciences, School of Medicine, University of Barcelona,  
18  
19 37 Barcelona, Spain  
20  
21  
22  
23  
24  
25

26 40 Correspondence to: Dr. Josep Comin-Colet, Department of Cardiology and Heart  
27  
28 41 Failure Program, Bellvitge University Hospital, 08907 L'Hospitalet de Llobregat,  
29  
30 42 Barcelona, Spain  
31  
32  
33  
34

35 44 Email: josepcomin@gmail.com  
36  
37  
38  
39  
40  
41  
42  
43

44 50 Word count: 4,140  
45  
46  
47  
48  
49  
50  
51  
52  
53  
54  
55  
56  
57  
58  
59  
60

1  
2  
3 53 **ABSTRACT**  
4  
5  
6

7 55 **Objectives:** To gather insights on the disease experience of patients with heart failure  
8 with reduced ejection fraction (HFrEF), and assess how patients' experiences and  
9  
10 56 narratives related to the disease complement data collected through standardized  
11  
12 57 patient-reported outcome measures (PROMs). Also, to explore new ways of evaluating  
13  
14 58 the burden experienced by patients and caregivers.  
15  
16 59

17  
18 60 **Design:** Observational, descriptive, multicenter, cross-sectional, mixed-methods study.  
19

20 61 **Setting:** Secondary care, patient's homes.  
21

22 62 **Participants:** Twenty patients with HFrEF (NYHAs I-III) aged 38-85 years.  
23

24 63 **Measures:** PROMs EuroQoL 5D-5L and Kansas City Cardiomyopathy Questionnaire  
25 and patient interview and observation.  
26  
27 64

28 65 **Results:** A total of 20 patients with HFrEF participated in the study. The patients' mean  
29 (SD) age was 72.5 (11.4) years, 65% were male, and were classified in NYHA  
30  
31 66 functional classes I (N=4), II (N=7) and III (N=9). The study showed a strong impact of  
32  
33 67 HF in the patients' quality of life (QoL) and disease experience, as revealed by the  
34  
35 68 standardized PROMs (EQ-5D-5L global index=0.64 [0.36]; KCCQ total symptom  
36  
37 69 score=71.56 [20.55]) and the in-depth interviews. Patients and caregivers often  
38  
39 70 disagreed describing and evaluating perceived QoL, as patients downplayed their  
40  
41 71 limitations and caregivers overemphasized the poor QoL of the patients. Patients  
42  
43 72 related current QoL to distant life experiences or to critical moments in their disease,  
44  
45 73 such as hospitalizations. Anxiety over the disease progression is apparent in both  
46  
47 74 patients and caregivers, suggesting that caregiver-specific tools should be developed.  
48  
49 75

50  
51 76 **Conclusions:** PROMs are an effective way of assessing symptoms over the most  
52 recent time period. However, especially in chronic diseases such as HFrEF, PROM  
53  
54 77 scores could be complemented with additional tools to gain a better understanding of  
55  
56 78 the patient's status. New PROMs designed to evaluate and compare specific points in  
57  
58 79 the life of the patient could be clinically more useful to assess changes in health status.  
59  
60 80

1  
2  
3 81  
45 82 **Strengths and limitations of this study**

- 7 83 • This study followed an ethnographic approach to collect data on patient's  
8  
9 84 experiences and narratives related to heart failure, a type of study not before  
10  
11 85 carried out in Spain and with scarce reports worldwide.  
12  
13 86 • Both patients and caregivers could discuss freely and explain in detail the  
14  
15 87 aspects of the disease that they considered under control and those where  
16  
17 88 change was deemed necessary.  
18  
19  
20 89 • The often-contrasting views of patients and caregivers highlighted the  
21  
22 90 difficulties in obtaining accurate and objective evaluations of quality of life.  
23  
24 91 • Although the selection of patients aimed for inclusiveness and diversity, the  
25  
26 92 limited number of HFREF patients selected for in-depth analysis may not be fully  
27  
28 93 representative of the population of HFREF patients in Spain.  
29  
30 94 • The ethnographic interviews took place in the context of the COVID-19  
31  
32 95 pandemic, which transformed the daily routines of patients and caregivers and  
33  
34 96 may have to a certain extent altered their perspective of living with HFREF.  
35  
36  
37 97  
38  
39 98  
40  
41 99  
42  
43 100



## 101 INTRODUCTION

102  
103 Despite advances in treatment, heart failure (HF) remains one of the leading causes of  
104 hospitalization and readmissions, death and disability worldwide.<sup>1,2</sup> The economic  
105 burden of HF, mainly driven by recurrent hospitalizations, consumes an estimated 1-  
106 2% of healthcare budgets.<sup>3,4</sup> The progressive aging of the population in some Western  
107 countries, such as Spain, and increasing HF prevalence, have positioned this disease  
108 as a major public health problem.<sup>5-7</sup>

109 Clinically, HF can be classified based on the left ventricular ejection fraction  
110 (LVEF) into HF with reduced ejection fraction (HFrEF), defined as an EF  $\leq 40\%$ , mildly-  
111 reduced ejection fraction (HFmrEF), defined as EF  $>40\%$  and  $<50\%$ , and HF with  
112 preserved ejection fraction (HFpEF), defined as an ejection fraction  $\geq 50\%$ .<sup>8</sup> Patients in  
113 these subgroups often have distinct underlying etiologies, demographics, co-  
114 morbidities and response to therapies.<sup>9,10</sup> Additionally, the presence and severity of  
115 symptoms and exercise intolerance of patients with HF is usually categorized following  
116 the New York Heart Association (NYHA) classification into four functional classes (I-IV),  
117 being class IV the worst.<sup>11</sup>

118 HF can severely affect the quality of life (QoL) of the patient by reducing their  
119 independence and ability to undertake daily living activities, and can also disturb their  
120 mental health and psychosocial well-being.<sup>12,13</sup> Prior studies have shown that patients  
121 with HF had an even higher incidence of limitations than patients with chronic diseases  
122 such as diabetes, cancer, or Alzheimer's disease.<sup>13</sup> Several patient-reported outcome  
123 measures (PROMs) have been used to quantify health status in patients with HF, such  
124 as the generic EuroQoL 5D-5L (EQ-5D-5L) and the disease-specific Kansas City  
125 Cardiomyopathy Questionnaire (KCCQ).<sup>13-17</sup> PROMs such as the KCCQ have a good  
126 correlation with prognosis and their use has been encouraged by the American Heart  
127 Association in both routine clinical practice and clinical trials of new therapies.<sup>18,19</sup>  
128 However, although these PROMs can be useful indicators of health status and how HF

1  
2  
3 129 impacts patients' QoL within a 2-week recall period, they have not been designed to  
4  
5 130 reflect some of the patient's and caregiver's perspectives on living with HF, including  
6  
7 131 aspects such as the importance of interactions with family or healthcare providers,  
8  
9 132 feelings related to the course of their disease, or barriers to accessing healthcare  
10  
11 133 resources.<sup>20</sup> These unique aspects of culture, preferences, customs, values and  
12  
13 134 attitudes, could have an impact on treatment effectiveness and outcomes.  
14  
15 135 Complementary to PROMs, in-depth interviews with patients and caregivers are useful  
16  
17 136 to evaluate quality of patient care and the interaction between the patient and the  
18  
19 137 healthcare system.<sup>21</sup> However, neglecting the limitations PROMs could hinder our  
20  
21 138 understanding of the patient's attitudes and real-life disease experiences.  
22  
23

24 139 Ethnographic qualitative studies involve observation of the patients and  
25  
26 140 caregivers in their real-world settings to determine how they behave in specific  
27  
28 141 contexts. Ethnographic research collects comprehensive information from multiple  
29  
30 142 sources such as interviews, caregiver perspectives, non-participant observation of  
31  
32 143 healthcare visits and home tours, among others, and has previously been carried out to  
33  
34 144 investigate QoL in patients with HF.<sup>12,22-27</sup> Previous ethnographic studies conducted in  
35  
36 145 patients from the United Kingdom identified barriers to interventions for HF and critical  
37  
38 146 points on disease pathways which resulted in an increase in the risk of admission.<sup>28-30</sup>  
39  
40

41 147 Little is known about the patient's and caregiver's perspective of living with HF  
42  
43 148 in Spain, and previous studies did not evaluate patients by LVEF.<sup>31</sup> The objective of  
44  
45 149 this study was to gather insights on the disease experiences of patients with HFrEF  
46  
47 150 and their caregivers, and the impact on their everyday life. We used a mixed methods  
48  
49 151 approach involving the parallel use of an ethnographic approach with PROMs for the  
50  
51 152 assessment of health status (EQ-5D-5L and KCCQ). Rather than seeking corroboration  
52  
53 153 of results from different data sources, the mixed methods approach intended to  
54  
55 154 highlight the complementarity of ethnographic data and PROMs.<sup>32,33</sup> The goal was to  
56  
57 155 improve awareness of healthcare professionals, service providers, policy makers and  
58  
59 156 educators on the factors that can potentially influence treatment effectiveness, and the  
60

1  
2  
3 157 existence of aspects of the patient's experience that are not covered by existing tools.  
4  
5 158 In turn, this may encourage firstly, a more active participation of healthcare providers,  
6  
7 159 patients and caregivers in clinical decisions considering not only the disease state, but  
8  
9 160 also cultural factors and individual values and attitudes, and secondly, the development  
10  
11 161 of instruments for the evaluation of healthcare interventions.  
12  
13  
14 162  
15  
16 163  
17  
18 164

## 19 20 165 **METHODS**

21  
22 166  
23  
24 167 We conducted an observational, cross-sectional, descriptive, multicenter, and mixed  
25  
26 168 methods study to obtain insights regarding HFREF patients' perception and attitudes  
27  
28 169 towards their disease. The patients in the study were recruited at the Departments of  
29  
30 170 Cardiology of 2 large tertiary-level hospitals, namely, the Puerta del Hierro University  
31  
32 171 Hospital (Majadahonda, Madrid, Spain) and the Bellvitge University Hospital (Hospitalet  
33  
34 172 de Llobregat, Barcelona, Spain). The patient populations attended by these hospitals  
35  
36 173 were socioeconomically very distinct, as the Puerta del Hierro University Hospital is  
37  
38 174 located at a high-income district of Madrid, and the Bellvitge University Hospital covers  
39  
40 175 a suburban area of mostly low or very low-income patients. Due to the qualitative and  
41  
42 176 observational design of the study, there was no masking or randomization. Clinical  
43  
44 177 management of the patients followed routine clinical practice, with no changes in  
45  
46 178 treatment or additional clinical assessments specific for this study. All decisions related  
47  
48 179 to disease management were made at the discretion of the treating physician without  
49  
50 180 interference by the sponsor. Informed consent was obtained from each patient prior to  
51  
52 181 study initiation. The patients authorized the interview with their main caregiver as part  
53  
54 182 of the informed consent process. The study protocol was approved by the Ethics  
55  
56 183 Review Board of the Bellvitge University Hospital on March 12<sup>th</sup>, 2020 with number  
57  
58 184 PR062/20.  
59  
60

1  
2  
3 1854  
5 186 ***Patient selection***

6  
7 187 Patients were assessed for eligibility by local clinical staff according to selection criteria  
8  
9 188 at each participating center. Patients were classified by NYHA class and could be  
10  
11 189 belong to any of the 4 classes I to IV. The inclusion criteria were  $\geq 18$  years at the time  
12  
13 190 of consent, established documented diagnosis of HFrEF (LVEF  $\leq 40\%$ ), and signed  
14  
15 191 consent to participate. Patients unable to complete the PROMs because of any  
16  
17 192 psychological or physical condition and patients hospitalized at inclusion were  
18  
19 193 excluded.

20  
21  
22 194 A sample size of 20 patients was selected to have sufficient representation of  
23  
24 195 the 3 major NYHA classes. Purposeful sampling was based on the characteristics of  
25  
26 196 potential participants extracted from medical records to obtain optimal variety.

27  
28 19729  
30 198 ***Data collection***

31  
32 199 The patient's demographic information and medical history were collected from medical  
33  
34 200 records at the selection visit. On the day of the home visit the patients first completed  
35  
36 201 two health status questionnaires and then two female senior researchers (SCC, MFE)  
37  
38 202 with  $>5$  years of experience in medical sociology and medical anthropology conducted  
39  
40 203 a semi-structured interview following a topic guide (See Supplementary Materials).  
41  
42 204 There was no prior relationship between the interviewer and the patient, who was  
43  
44 205 informed about the research goals prior to starting the interview. The interview  
45  
46 206 conducted at the patient's home lasted approximately 90 minutes. In some instances,  
47  
48 207 with the consent of the patient, his/her closest caregivers were interviewed at the  
49  
50 208 patient's home on the same day for about 30 min. The interview with the caregivers  
51  
52 209 aimed at understanding their perception of the patient's status and evaluating their  
53  
54 210 social and emotional relationship with the patient.

55  
56  
57 211 In order to gather observational data to complement participants' accounts of  
58  
59 212 their medical experience, 6 out of 20 patients (two per NYHA class) consented that the

1  
2  
3 213 same researcher carrying out the interview would observe their first healthcare  
4  
5 214 appointment after the home interview. Direct observation allowed researchers to gather  
6  
7 215 information regarding patients' objective and subjective experiences during medical  
8  
9 216 encounters, about how patients and caregivers conveyed concerns and needs, and  
10  
11 217 provided clues about incongruent behaviour. A single appointed researcher observed  
12  
13 218 the initial and main focus of conversations with healthcare providers, questions by  
14  
15 219 patients and caregivers, and patients' use of verbal and non-verbal communication  
16  
17 220 (e.g., behaviour that suggested passive, nervous, impatient, caring, or expectant  
18  
19 221 attitudes). Immediately after the appointment, patients and caregivers, if present, were  
20  
21 222 asked to evaluate the medical visit (clinical encounters last 20 minutes on average).  
22  
23 223 Researchers took field notes and added reflexive comments about the encounter and  
24  
25 224 about participants' experience.

26  
27  
28 225 The in-depth interview aimed to capture the patients' experience with the  
29  
30 226 disease from their own point of view, whereas the non-participant observation during  
31  
32 227 the medical visits allowed to investigate the relationship with the healthcare  
33  
34 228 practitioners for both of patients and family members.

35  
36  
37 229 Data from in-depth interviews were collected by audio recording and field notes,  
38  
39 230 whereas data from direct observation of medical encounters were collected by field  
40  
41 231 notes only, taking into consideration all aspects of the patient's life and in all cases  
42  
43 232 protecting the patient's data privacy.

44  
45 233

#### 46 47 234 **Quantitative outcomes and analyses**

48  
49 235 Secondary variables assessed included PROMs by using the EQ-5D-5L and KCCQ.  
50  
51 236 The EQ-5D-5L is a self-reported questionnaire used to derive a standardized measure  
52  
53 237 of health status, also referred to as a utility score.<sup>34</sup> The KCCQ is a self-administered  
54  
55 238 HF-specific instrument and has shown to be a valid, reliable and responsive measure  
56  
57 239 for patients with HF.<sup>14</sup> Spanish validated versions of these questionnaires were  
58  
59 240 used.<sup>35,36</sup> For the EQ-5D-5L, the number and percentage of patients reporting any type

1  
2  
3 241 of limitation for each questionnaire dimension, the number and percentage of patients  
4  
5 242 reporting “severe” or “extreme” responses for each questionnaire dimension, as well as  
6  
7 243 the index value and the visual analogue scale (VAS, where 100 equals the best health  
8  
9 244 HF patients can imagine), were assessed; for the KCCQ, the score for each  
10  
11 245 domain/subdomain, and a summary score for the total symptom score, clinical  
12  
13 246 symptom score and overall summary score were assessed (scores range from 0 to  
14  
15 247 100; were higher scores indicate a better health status). The PROMs were analyzed  
16  
17 248 descriptively.  
18  
19  
20  
21

### 22 250 ***Qualitative outcomes and analyses***

23  
24 251 The following primary variables were assessed: the patient’s profile; the patient’s  
25  
26 252 emotional perception (values, attitude, frustration, fear) during the HFrEF journey,  
27  
28 253 including the role of the caregiver; key relationships and communication processes  
29  
30 254 during the patient HFrEF journey (patient-doctor, patient-carer/family); main barriers to  
31  
32 255 accessing healthcare services experienced by patients during the HFrEF journey; and  
33  
34 256 the patient’s unmet needs (cognitive, emotional and functional) associated with HF.  
35  
36 257 Observational data, interviews and documentary materials were analyzed at three  
37  
38 258 levels: individual patient cases, across cases within research centers, and across  
39  
40 259 research centers to synthesis.  
41  
42

43 260 Thematic content analysis was used to analyse the data gathered from  
44  
45 261 interviews and direct observation of clinical encounters. The analysis was carried out  
46  
47 262 by field researchers in six steps: 1) read and re-read of interview and medical  
48  
49 263 encounters’ fieldnotes; 2) identification of main topics per interview domain; 3) text  
50  
51 264 codification to identify current and new domains; 4) review of PROM scores per  
52  
53 265 interviewer and NYHA class; 5) comparison of PROM scores and fieldwork data; and  
54  
55 266 6) and synthesis of repetitive patterns.  
56  
57

58 267 Subsequently, data triangulation was used to integrate quantitative and  
59  
60 268 qualitative information by the researchers, individually and in joint sessions. Three

1  
2  
3 269 types of triangulation were used: investigator, data and methodological triangulation.  
4  
5 270 Two investigators were involved in the data collection and analysis. Findings from each  
6  
7 271 investigator were compared to develop a deeper understanding of how the different  
8  
9 272 investigators view the issue. Preliminary conclusions were discussed with the broader  
10  
11 273 team of authors in further analysis sessions. Regarding data triangulation, investigators  
12  
13 274 compared the answers from patients and caregivers (information sources) separately  
14  
15 275 to identify areas of agreement and disagreement over the main topics. Regarding  
16  
17 276 methodological triangulation, findings from interviews, direct observations of medical  
18  
19 277 appointments, and PROM scores were compared to identify incongruences and  
20  
21 278 disparities in patients' responses (e.g., patients reporting mild limitations in PROMs but  
22  
23 279 highlighting severe limitations during the interview and/or medical appointment).

26 280 The analytical process aimed to reach theoretical saturation where no new  
27  
28 281 dimensions emerged during joint sessions.  
29  
30  
31 282  
32  
33 283

## 34 284 **RESULTS**

### 38 286 ***Patient characteristics***

40 287 A total of 20 patients with HF<sub>r</sub>EF participated in the study (Table 1). The mean (SD)  
41  
42 288 age of the patients was 72.5 (11.4) years (range, 38-85 years), and 13 (65.0%) were  
43  
44 289 male. The study included 4, 7 and 9 patients in NYHA functional classes I-III,  
45  
46 290 respectively. Although the study protocol was designed to include class IV patients,  
47  
48 291 their frailty, and the effects of the COVID-19 pandemic in the patients' self-caring  
49  
50 292 strategies, hindered the participation of any patients in this class. Twelve patients were  
51  
52 293 being treated at the Bellvitge University Hospital and 8 patients were being treated at  
53  
54 294 the Puerta del Hierro University Hospital.  
55  
56  
57  
58  
59  
60

### 296 296 ***Understanding of QoL by patients with HF***



1  
2  
3 297 During the in-depth interviews, the participants described how living with HFrEF  
4  
5 298 impacted their lives, including how they experienced the symptoms of HF and their  
6  
7 299 effects on daily routines (summarized in Table 2). Their responses provided relevant  
8  
9 300 insights on what QoL meant to them. For many patients, QoL was "being able to do  
10  
11 301 what they did before" and missed being independent, their everyday life and  
12  
13 302 maintaining an active lifestyle.

14  
15 303 Patients tended to self-limit and isolate to limit symptomatology due to  
16  
17 304 progression-related fears or even fear to a sudden death, despite a more sedentary  
18  
19 305 lifestyle being detrimental to the recovery and to their own QoL.  
20  
21

22 306

### 23 24 307 ***Impact of demographic factors in perception of QoL***

25  
26 308 Attitudes and perceptions towards HFrEF seemed to strongly depend on age and  
27  
28 309 education. Young patients tend to be more informed about the disease and challenge  
29  
30 310 the healthcare practitioners' opinions.  
31

32  
33 311 In contrast, older patients had a difficult time differentiating between HFrEF  
34  
35 312 symptoms and those associated with the normal process of ageing. Often caregivers  
36  
37 313 had to help them understand the information provided by healthcare workers.  
38

39 314 The interviews also revealed that male patients showed more dependency towards  
40  
41 315 caregivers than their female counterparts. Female caregivers tended to strongly  
42  
43 316 challenge male patients' perception of QoL. In one case, the wife of a NYHA III patient  
44  
45 317 was very critical of her husband's attitude and thought that part of his evolution strongly  
46  
47 318 depended on his will, and asked him to exercise more, read, get on the computer, and  
48  
49 319 go out for a ride on the motorcycle. They even consulted with a psychologist friend to  
50  
51 320 help them handle the situation.  
52

53 321

### 54 55 322 ***PROMs and health status***

56  
57 323 The results of the EQ-5D-5L and KCCQ showed a strong correspondence with the  
58  
59 324 NYHA functional classes, and also between the two PROMs (Table 3). We found that



1  
2  
3 325 scores from PROMs dropped as the NYHA increased (i.e., the higher the NYHA class  
4  
5 326 and the HF symptoms, the worse their perceived health status was). No differences  
6  
7 327 were observed in scores with respect to gender, or between the patients from the two  
8  
9 328 hospitals.

10  
11 329 Some patients with lower NYHAs, despite having visible constraints in health  
12  
13 330 status, indicated high scores in the EQ-5D-5L VAS score. For example, a patient with  
14  
15 331 major comorbidities [1-10] with NYHA I indicated a EQ-5D-5L VAS score of 90 and  
16  
17 332 emphasized that her QoL was good. This contrasted with the views expressed by her  
18  
19 333 caregiver (Table 2).

20  
21  
22 334 Regardless of the NYHA, some patients seemed to minimize and relativize the  
23  
24 335 impact of HFrEF on their QoL. Caregivers, in contrast, could emphasize the limitations  
25  
26 336 imposed by HFrEF. For example, the wife and caregiver of a NYHA II patient [1-11]  
27  
28 337 indicated that in the consultation with the cardiologist the patient usually  
29  
30 338 underestimated his condition. In another case, the wife of a NYHA III patient  
31  
32 339 commented that she must be “present with the doctors, because when they ask him  
33  
34 340 something, he usually answers that he is fine and does not really say what is wrong  
35  
36 341 with him.”

37  
38  
39 342 Patients with advanced NYHAs, who experienced one or several hospital  
40  
41 343 admissions, compared their current experience with the disease to those acute periods  
42  
43 344 of fear and greater uncertainty. Patients showed a limited portrait of their QoL due to  
44  
45 345 the required reference to the last 2-weeks in the questionnaire. For example, a NYHA  
46  
47 346 III patient [2-8] had doubts when filling out the questionnaires since he related his  
48  
49 347 mobility limitations to a problem with his legs (a consequence of an aortic dissection)  
50  
51 348 but he did not relate it to HF. Also, he mentioned that his physical and emotional  
52  
53 349 situation was much better now compared to the initial moments where he was more  
54  
55 350 affected. He had a hard time taking the prior two weeks as a reference point, therefore  
56  
57 351 his responses showed a feeling of improvement compared to the most critical  
58  
59 352 moments.  
60

1  
2  
3 353 Another NYHA III patient [2-6] had doubts when filling the questionnaires, since  
4  
5 354 his symptoms varied from day to day and between morning, afternoon and night. He  
6  
7 355 also had moments of crises where he considered his symptoms to be worse, so limiting  
8  
9 356 to the last two weeks seemed difficult. Likewise, he stated that shortness of breath or  
10  
11 357 air was something he thought he got from lying down for a long time and not that it was  
12  
13 358 a symptom of HFrEF.

15 359 Caregivers could overestimate and present a dramatic view of the patient's day-  
16  
17 360 to-day life with HFrEF. Family caregivers showed more distress when discussing their  
18  
19 361 relatives with HFrEF compared to that showed by remunerated caregivers:  
20  
21

22 362

24 363 *“she is concerned about his low spirits and his anguish. She says that the*  
25  
26 364 *symptoms she develops from anxiety can “mask” the symptoms of HF,*  
27  
28 365 *such as pressure and pain in the chest, agitation, a feeling of suffocation.”*

30 366 [caregiver of patient 1-8, NYHA III]  
31  
32

33 367

34 368 *“As cardiologists told us that little can be done to improve his condition, we*  
35  
36 369 *live these years ‘as a gift’.”* [caregiver of patient 1-6]  
37  
38

39 370

### 41 371 **Caregivers' roles and needs**

42  
43 372 In this study, only five patients were able to live without a caregiver. Generally, strong  
44  
45 373 family bonds were apparent and important for the patient. Caregivers were often in  
46  
47 374 charge of organizing visits to the healthcare providers, keeping track of parameters  
48  
49 375 such as weight and blood pressure, and administering medication (Table 2).

51 376 Caregivers acted also as interpreters of the disease status on behalf of their patients.  
52  
53

54 377

### 56 378 **Relationships with healthcare providers**

57  
58 379 The interactions between patients and caregivers with healthcare workers at  
59  
60 380 hospitals were investigated by the social scientists by accompanying them to a

1  
2  
3  
4  
5  
6  
7  
8  
9  
10  
11  
12  
13  
14  
15  
16  
17  
18  
19  
20  
21  
22  
23  
24  
25  
26  
27  
28  
29  
30  
31  
32  
33  
34  
35  
36  
37  
38  
39  
40  
41  
42  
43  
44  
45  
46  
47  
48  
49  
50  
51  
52  
53  
54  
55  
56  
57  
58  
59  
60

381 medical appointment. The study showed that patients are usually highly positive  
382 about their experience with cardiologists and nurses (Table 2). A patient [1-9]  
383 explained that the nurse called him weekly to ask about how he was coping,  
384 and to discuss data such as weight and blood pressure changes. He generally  
385 felt very accompanied by the hospital staff, both cardiologists and nurses. Other  
386 patients also expressed a high opinion of the healthcare personnel. Often  
387 patients highly value their relationship with the nurse, as they probably feel  
388 more confident to express their experiences to his/her.  
389  
390  
391

For peer review only

## DISCUSSION

In this study we used ethnographic methods with HFREF patients and their caregivers, complemented with general and disease-specific health status assessments, to obtain insights regarding patients' disease perception and attitudes towards their disease.

Ethnographic methods adopt a phenomenological perspective, aiming to understand individuals' life experiences to acquire relevant knowledge. The results of this study suggest that the patient's perspectives of their QoL were dependent on their memories of what they could do before, and often were better than reality. Caregivers, in contrast, offered a distinct view of the patient's status and QoL, often substantially worse and emphasizing the severity of their life-limiting condition.

As healthcare systems aim to become more 'patient-centered', there is a recognized need to capture accurately the patient's experience of the disease, in an effort to improve it. The use of PROMs have therefore become common in assessing current treatments and new therapies and medical interventions, although their application in clinical practice is still very limited. Despite their widespread use by cardiologists, an awareness of the limitations of PROMs when evaluating the experience of the patient with HF is critical for their interpretation. For example, the effects of comorbid conditions could add confounding factors to the evaluation of HF through a single PROM instrument. Likewise, patients often relate their overall QoL experience to the moments of crisis, such as hospitalizations, 'anchoring' all subsequent experiences to those events and distorting their responses in the questionnaires.

In the general population the understanding of HF and its outcome is low, contributing to anxiety about the evolution of the disease in both patients and caregivers. In contrast, other life-limiting diseases, such as cancer, often have better-defined pathways of care and psychosocial support.<sup>30</sup> In this regard, patient associations and support groups could play a role by helping the patient understand

1  
2  
3 420 the disease, the treatments, and the expectations. Patient associations promote social  
4  
5 421 integration and help patient share their experiences, providing the necessary  
6  
7 422 encouragement to cope with their disease and go on with daily activities. Also, as  
8  
9 423 reflected in some of the interviews described in this study, it is important for the patient  
10  
11 424 to feel that he/she can have rapid access to medical services. In this regard, the study  
12  
13 425 reflected that that while some patients were reluctant to discuss aspects of daily life or  
14  
15 426 to express their feelings and fears to the cardiologist, they were more open and felt  
16  
17 427 closer to the nurse, a relationship that was highly valued by many patients. Generally,  
18  
19 428 an efficient and fluid communication with all the healthcare providers involved in the  
20  
21 429 treatment is essential.<sup>12,29</sup>

22  
23  
24 430 The study revealed that the fear to losing independence and the uncertainty  
25  
26 431 about the progress of their disease could be factors that motivate some HF patients to  
27  
28 432 downplay their limitations. Conversely, caregivers could overemphasize the poor QoL  
29  
30 433 of the patients, also motivated by concerns of the progress of the disease, its  
31  
32 434 unpredictable trajectory, and lack of proper knowledge and training. Also, it is possible  
33  
34 435 that, since these caregivers were very often family members, their views could be  
35  
36 436 overstated due to emotional attachment to the patient. In any case, these results  
37  
38 437 suggest that instruments should be developed to help caregivers in their daily work with  
39  
40 438 patients with HF, so that they are better informed on the course of the disease and  
41  
42 439 expectations.<sup>25</sup> In this regard, numerous recent studies have highlighted challenges  
43  
44 440 experienced by caregivers of patients with HF.<sup>37-40</sup> Some initiatives along these lines,  
45  
46 441 such caregiver-specific QoL questionnaires,<sup>41</sup> and video coaching,<sup>42,43</sup> are currently  
47  
48 442 being developed and tested.

49  
50  
51 443 The results of our study suggest recommendations for future PROM design or  
52  
53 444 questionnaire selection. In patients with HF the PROM instruments should aim to truly  
54  
55 445 mirror patients' experience, using language that the patient associates with their  
56  
57 446 cultural views of QoL. To provide insights on relevant changes in QoL, the PROMs  
58  
59 447 should be constructed to capture specific timepoints related to the patient experience  
60

1  
2  
3 448 (e.g., healthcare status before the diagnosis, and before and after hospitalizations). In  
4  
5 449 this way, reference points in the patient's lives could be established that favored  
6  
7 450 meaningful QoL before/after comparisons. Instruments should allow an alternative  
8  
9 451 stratification based on these clinical events and patients' perceived QoL along them.  
10  
11 452 Also, as self-care behaviors can greatly affect symptoms in patients with HF,<sup>44</sup> the  
12  
13 453 patient's self-caring strategies, perception of autonomy, level of empowerment, and the  
14  
15 454 perception of past and present experiences with the disease should be taken into  
16  
17 455 consideration when developing and introducing future PROM instruments.<sup>45</sup> Finally,  
18  
19 456 additional instruments should be developed to evaluate the key aspects of the patient'  
20  
21 457 support system, and explore caregivers' needs.

22  
23  
24 458         Given the lack of studies assessing the patient's and caregiver's perspective on  
25  
26 459 the HFrEF pathway in Spain, this study aimed to fill this gap to better understand  
27  
28 460 possible cultural differences. The ethnographic approach, which involved in-depth  
29  
30 461 interviews with patients at their homes and with their caregivers, made it possible to  
31  
32 462 collect relevant data not normally discussed or shared in healthcare facilities. Both  
33  
34 463 patients and caregivers could talk freely and explain the aspects of the disease that  
35  
36 464 they considered under control and those where change was deemed necessary.  
37  
38 465 However, a limitation of this study is that the small sample size, although not unusual in  
39  
40 466 qualitative research that requires extensive and detailed analysis of each patient, may  
41  
42 467 not fully represent the diversity of people with HFrEF in Spain. Also, as it is the case in  
43  
44 468 other ethnographic studies, interviewing patients and caregivers together may have  
45  
46 469 resulted in individual perspectives being altered or withheld. Finally, since this study  
47  
48 470 was carried out during the COVID-19 pandemic, it is possible that the disruption  
49  
50 471 imposed by the social restrictions could have some effect in the results described here.

51  
52 472         In conclusion, this study analyzed, by the use of PROMs and in-depth  
53  
54 473 interviews, the complexity of the actual experiences of the patients with HFrEF. The  
55  
56 474 lack of knowledge about the disease generates confusion and anxiety about  
57  
58 475 symptoms, and patients could tend to minimize the impact of HF in QoL. Patients tend

1  
2  
3 476 to maintain a closer relationship with their nurses, compared with the cardiologist,  
4  
5 477 favoring a more open discussion of feelings and experiences related to the disease  
6  
7 478 with them. In order to provide personalized care to HFREF patients, QoL could be  
8  
9 479 assessed by comparing two points in time, thus helping the healthcare practitioner  
10  
11 480 understand the patient's point of view of specific interventions. Since QoL is a  
12  
13 481 multidimensional, subjective concept that is affected by a variety of factors, its  
14  
15 482 evaluation should be carefully designed to capture specific moments and changes in  
16  
17 483 the trajectory of the disease. The study suggests that tools and training should be  
18  
19 484 made available to caregivers to alleviate the burden of care and anxiety derived from  
20  
21 485 uncertainty in the progression of the disease. Further work is needed to fully integrate  
22  
23 486 the use of well-designed and useful PROMs into clinical practice.  
24  
25  
26 487  
27  
28 488  
29  
30 489  
31

### 32 **Acknowledgements**

33  
34 491 Medical writing assistance was provided by Francisco López de Saro, PhD (Trialance).  
35  
36  
37 492

### 38 **Contributors**

39 493  
40  
41 494 RR, BP, LV, SCC, and JCC conceived and designed the study. EC, NJ, MRM, SY,  
42  
43 495 SJM, LA, AG, PM, LSF, MTSG, EH, CE, ECM, JVLI, JSC, and JCC contributed to  
44  
45 496 patient recruitment and data collection. SCC and MFE conducted the interviews and  
46  
47 497 collected qualitative data. RR, BP, LV, SCC, MFE, JSC, JCC compiled and analyzed  
48  
49 498 the data. RF, YR and MSS contributed to data interpretation in coordination with patient  
50  
51 499 support organizations. RR, BP, LV, SCC, and JCC drafted the manuscript, which was  
52  
53 500 revised by the other authors. PG provided a critical revision of an earliest version and  
54  
55 501 contributed to the interpretation of the results. All authors read and approved the final  
56  
57 502 manuscript.  
58  
59  
60 503

1  
2  
3 504 **Funding**  
4

5 505 This work was supported by AstraZeneca España. Grant number does not apply.  
6  
7 506

8  
9 507 **Competing interests**  
10

11 508 JCC received fees from AstraZeneca for the coordination and oversight of the study.  
12

13 509 RR, MFE, and SCC received research funding from AstraZeneca. RFdIF, BP, and LV  
14

15 510 are employees of AstraZeneca. All other authors report no competing interests.  
16  
17 511

18  
19  
20 512 **Patient and public involvement**  
21

22 513 CardioAlianza, a Spanish association of patients with cardiovascular disease and their  
23

24 514 caregivers, was involved in designing, providing feedback for interpretation of data, and  
25

26 515 in the dissemination of this research.  
27  
28 516

29  
30 517 **Patient consent for publication**  
31

32 518 Informed consent for participation in the study and publication of the results were  
33

34 519 obtained from each patient prior to study initiation.  
35  
36 520

37  
38  
39 521 **Ethics approval**  
40

41 522 This study was approved by the Ethics Review Board of the Bellvitge University  
42

43 523 Hospital on March 12<sup>th</sup>, 2020 with number PR062/20.  
44  
45 524

46  
47 525 **Data availability statement**  
48

49 526 The data that support the findings of this study are available on reasonable request  
50

51 527 from the corresponding author. The data are not publicly available due to their  
52

53 528 containing information that could compromise the privacy of research participants.  
54  
55 529



## REFERENCES

1. Savarese G, Lund LH. Global Public Health Burden of Heart Failure. *Card Fail Rev.* 2017;3(1):7-11. doi:10.15420/cfr.2016:25:2
2. Crespo-Leiro MG, Metra M, Lund LH, et al. Advanced heart failure: a position statement of the Heart Failure Association of the European Society of Cardiology. *Eur J Heart Fail.* 2018;20(11):1505-1535. doi:10.1002/ejhf.1236
3. Hollingworth W, Biswas M, Maishman RL, et al. The healthcare costs of heart failure during the last five years of life: A retrospective cohort study. *Int J Cardiol.* 2016;224:132-138. doi:10.1016/j.ijcard.2016.09.021
4. Agbor VN, Ntusi NAB, Noubiap JJ. An overview of heart failure in low- and middle-income countries. *Cardiovasc Diagn Ther.* 2020;10(2):244-251. doi:10.21037/cdt.2019.08.03
5. Farré N, Vela E, Clèries M, et al. Medical resource use and expenditure in patients with chronic heart failure: a population-based analysis of 88 195 patients. *Eur J Heart Fail.* 2016;18(9):1132-1140. doi:10.1002/ejhf.549
6. Farré N, Vela E, Clèries M, et al. Real world heart failure epidemiology and outcome: A population-based analysis of 88,195 patients. *PLoS One.* 2017;12(2):e0172745. doi:10.1371/journal.pone.0172745
7. Méndez-Bailón M, Jiménez-García R, Hernández-Barrera V, et al. Significant and constant increase in hospitalization due to heart failure in Spain over 15 year period. *Eur J Intern Med.* 2019;64:48-56. doi:10.1016/j.ejim.2019.02.019
8. McDonagh TA, Metra M, Adamo M, et al. 2021 ESC Guidelines for the diagnosis and treatment of acute and chronic heart failure. *European Heart Journal.* 2021;42(36):3599-3726. doi:10.1093/eurheartj/ehab368
9. Bhatt AS, Abraham WT, Lindenfeld J, et al. Treatment of HF in an Era of Multiple Therapies: Statement From the HF Collaboratory. *JACC Heart Fail.* 2021;9(1):1-12. doi:10.1016/j.jchf.2020.10.014
10. Upadhyya B, Kitzman DW. Heart failure with preserved ejection fraction: New approaches to diagnosis and management. *Clin Cardiol.* 2020;43(2):145-155. doi:10.1002/clc.23321
11. Criteria Committee, New York Heart Association. *Diseases of the Heart and Blood Vessels. Nomenclature and Criteria for Diagnosis.* 6th ed. Little, Brown; 1964.
12. Fry M, McLachlan S, Purdy S, Sanders T, Kadam UT, Chew-Graham CA. The implications of living with heart failure; the impact on everyday life, family support, co-morbidities and access to healthcare: a secondary qualitative analysis. *BMC Fam Pract.* 2016;17(1):139. doi:10.1186/s12875-016-0537-5
13. Comín-Colet J, Anguita M, Formiga F, et al. Health-related Quality of Life of Patients With Chronic Systolic Heart Failure in Spain: Results of the VIDA-IC Study. *Revista Española de Cardiología.* 2016;69(3):256-271. doi:10.1016/j.recesp.2015.07.034
14. Green CP, Porter CB, Bresnahan DR, Spertus JA. Development and evaluation of the Kansas City Cardiomyopathy Questionnaire: a new health status measure for

- 1  
2  
3 573 heart failure. *J Am Coll Cardiol*. 2000;35(5):1245-1255. doi:10.1016/s0735-  
4 574 1097(00)00531-3
- 5  
6 575 15. Garin O, Herdman M, Vilagut G, et al. Assessing health-related quality of life in  
7 576 patients with heart failure: a systematic, standardized comparison of available  
8 577 measures. *Heart Fail Rev*. 2014;19(3):359-367. doi:10.1007/s10741-013-9394-7
- 9  
10 578 16. Burns DJP, Arora J, Okunade O, et al. International Consortium for Health  
11 579 Outcomes Measurement (ICHOM): Standardized Patient-Centered Outcomes  
12 580 Measurement Set for Heart Failure Patients. *JACC: Heart Failure*. 2020;8(3):212-  
13 581 222. doi:10.1016/j.jchf.2019.09.007
- 14  
15 582 17. Kelkar AA, Spertus J, Pang P, et al. Utility of Patient-Reported Outcome  
16 583 Instruments in Heart Failure. *JACC Heart Fail*. 2016;4(3):165-175.  
17 584 doi:10.1016/j.jchf.2015.10.015
- 18  
19 585 18. Rumsfeld JS, Alexander KP, Goff DC, et al. Cardiovascular health: the importance  
20 586 of measuring patient-reported health status: a scientific statement from the  
21 587 American Heart Association. *Circulation*. 2013;127(22):2233-2249.  
22 588 doi:10.1161/CIR.0b013e3182949a2e
- 23  
24 589 19. Psotka MA, von Maltzahn R, Anatchkova M, et al. Patient-Reported Outcomes in  
25 590 Chronic Heart Failure: Applicability for Regulatory Approval. *JACC Heart Fail*.  
26 591 2016;4(10):791-804. doi:10.1016/j.jchf.2016.04.010
- 27  
28 592 20. Nieminen MS, Dickstein K, Fonseca C, et al. The patient perspective: Quality of life  
29 593 in advanced heart failure with frequent hospitalisations. *International Journal of*  
30 594 *Cardiology*. 2015;191:256-264. doi:10.1016/j.ijcard.2015.04.235
- 31  
32 595 21. Pennucci F, De Rosis S, Passino C. Piloting a web-based systematic collection and  
33 596 reporting of patient-reported outcome measures and patient-reported experience  
34 597 measures in chronic heart failure. *BMJ Open*. 2020;10(10):e037754.  
35 598 doi:10.1136/bmjopen-2020-037754
- 36  
37 599 22. Heo S, Lennie TA, Okoli C, Moser DK. Quality of life in patients with heart failure:  
38 600 ask the patients. *Heart Lung*. 2009;38(2):100-108. doi:10.1016/j.hrtlng.2008.04.002
- 39  
40 601 23. Gwaltney. Hearing the voice of the heart failure patient: key experiences identified  
41 602 in qualitative interviews. *Br J Cardiol*. 2012;19(1). doi:10.5837/bjc.2012.004
- 42  
43 603 24. Etemadifar S, Bahrami M, Shahriari M, Farsani AK. Family caregivers' experiences  
44 604 of caring for patients with heart failure: a descriptive, exploratory qualitative study. *J*  
45 605 *Nurs Res*. 2015;23(2):153-161. doi:10.1097/JNR.0000000000000076
- 46  
47 606 25. Grant JS, Graven LJ. Problems experienced by informal caregivers of individuals  
48 607 with heart failure: An integrative review. *Int J Nurs Stud*. 2018;80:41-66.  
49 608 doi:10.1016/j.ijnurstu.2017.12.016
- 50  
51 609 26. Bjornsdottir K, Ketilsdottir A, Gudnadottir M, Kristinsdottir IV, Ingadottir B.  
52 610 Integration of nursing services provided to patients with heart failure living at home:  
53 611 A longitudinal ethnographic study. *J Clin Nurs*. Published online January 12, 2021.  
54 612 doi:10.1111/jocn.15658
- 55  
56 613 27. Kim EY, Oh S, Son Y-J. Caring experiences of family caregivers of patients with  
57 614 heart failure: A meta-ethnographic review of the past 10 years. *Eur J Cardiovasc*  
58 615 *Nurs*. 2020;19(6):473-485. doi:10.1177/1474515120915040

- 1  
2  
3 616 28. Simmonds R, Glogowska M, McLachlan S, et al. Unplanned admissions and the  
4 617 organisational management of heart failure: a multicentre ethnographic, qualitative  
5 618 study. *BMJ Open*. 2015;5(10):e007522. doi:10.1136/bmjopen-2014-007522  
6  
7 619 29. Glogowska M, Simmonds R, McLachlan S, et al. Managing patients with heart  
8 620 failure: a qualitative study of multidisciplinary teams with specialist heart failure  
9 621 nurses. *Ann Fam Med*. 2015;13(5):466-471. doi:10.1370/afm.1845  
10  
11 622 30. Glogowska M, Simmonds R, McLachlan S, et al. "Sometimes we can't fix things": a  
12 623 qualitative study of health care professionals' perceptions of end of life care for  
13 624 patients with heart failure. *BMC Palliat Care*. 2016;15:3. doi:10.1186/s12904-016-  
14 625 0074-y  
15  
16 626 31. Checa C, Medina-Perucha L, Muñoz M-Á, Verdú-Rotellar JM, Berenguera A. Living  
17 627 with advanced heart failure: A qualitative study. *PLoS One*. 2020;15(12):e0243974.  
18 628 doi:10.1371/journal.pone.0243974  
19  
20 629 32. Greene JC, Caracelli VJ, Graham WF. Toward a Conceptual Framework for Mixed-  
21 630 Method Evaluation Designs. *Educational Evaluation and Policy Analysis*.  
22 631 1989;11(3):255-274. doi:10.3102/01623737011003255  
23  
24 632 33. Kane PM, Daveson BA, Ryan K, et al. Feasibility and acceptability of a patient-  
25 633 reported outcome intervention in chronic heart failure. *BMJ Support Palliat Care*.  
26 634 2017;7(4):470-479. doi:10.1136/bmjspcare-2017-001355  
27  
28 635 34. Herdman M, Gudex C, Lloyd A, et al. Development and preliminary testing of the  
29 636 new five-level version of EQ-5D (EQ-5D-5L). *Qual Life Res*. 2011;20(10):1727-  
30 637 1736. doi:10.1007/s11136-011-9903-x  
31  
32 638 35. Hernandez G, Garin O, Pardo Y, et al. Validity of the EQ-5D-5L and reference  
33 639 norms for the Spanish population. *Qual Life Res*. 2018;27(9):2337-2348.  
34 640 doi:10.1007/s11136-018-1877-5  
35  
36 641 36. Comín-Colet J, Garin O, Lupón J, et al. Validación de la versión española del  
37 642 Kansas City Cardiomyopathy Questionnaire. *Revista Española de Cardiología*.  
38 643 2011;64(1):51-58. doi:10.1016/j.recesp.2010.10.003  
39  
40 644 37. Wingham J, Frost J, Britten N. Behind the smile: qualitative study of caregivers'  
41 645 anguish and management responses while caring for someone living with heart  
42 646 failure. *BMJ Open*. 2017;7(7):e014126. doi:10.1136/bmjopen-2016-014126  
43  
44 647 38. Östman M, Bäck-Pettersson S, Sandvik A-H, Sundler AJ. "Being in good hands":  
45 648 next of kin's perceptions of continuity of care in patients with heart failure. *BMC*  
46 649 *Geriatr*. 2019;19(1):375. doi:10.1186/s12877-019-1390-x  
47  
48 650 39. Al-Rawashdeh S, Ashour A, Alshraifeen A, Rababa M. Experiences on Providing  
49 651 Home Care for A Relative with Heart Failure: A Qualitative Study. *J Community*  
50 652 *Health Nurs*. 2020;37(3):129-140. doi:10.1080/07370016.2020.1780043  
51  
52 653 40. Barnes S, Whittingham K. Informal carers' experiences of caring for a person with  
53 654 heart failure in a community setting. *Health Soc Care Community*. 2020;28(3):883-  
54 655 890. doi:10.1111/hsc.12919  
55  
56 656 41. Wingham J, Frost J, Britten N, et al. Caregiver outcomes of the REACH-HF  
57 657 multicentre randomized controlled trial of home-based rehabilitation for heart failure  
58  
59  
60

- 1  
2  
3 658 with reduced ejection fraction. *Eur J Cardiovasc Nurs*. 2019;18(7):611-620.  
4 659 doi:10.1177/1474515119850011  
5  
6 660 42. Riegel B, Hanlon AL, Coe NB, et al. Health coaching to improve self-care of  
7 661 informal caregivers of adults with chronic heart failure - iCare4Me: Study protocol  
8 662 for a randomized controlled trial. *Contemp Clin Trials*. 2019;85:105845.  
9 663 doi:10.1016/j.cct.2019.105845  
10  
11 664 43. Hirschman KB, Bowles KH, Garcia-Gonzalez L, et al. Lessons learned from the  
12 665 implementation of a video health coaching technology intervention to improve self-  
13 666 care of family caregivers of adults with heart failure. *Res Nurs Health*.  
14 667 2021;44(1):250-259. doi:10.1002/nur.22100  
15  
16 668 44. Auld JP, Mudd JO, Gelow JM, Hiatt SO, Lee CS. Self-care Moderates the  
17 669 Relationship Between Symptoms and Health-Related Quality of Life in Heart  
18 670 Failure. *J Cardiovasc Nurs*. 2018;33(3):217-224.  
19 671 doi:10.1097/JCN.0000000000000447  
20  
21 672 45. Sedlar N, Lainscak M, Mårtensson J, Strömberg A, Jaarsma T, Farkas J. Factors  
22 673 related to self-care behaviours in heart failure: A systematic review of European  
23 674 Heart Failure Self-Care Behaviour Scale studies. *Eur J Cardiovasc Nurs*.  
24 675 2017;16(4):272-282. doi:10.1177/1474515117691644  
25  
26  
27 676  
28 677  
29 678  
30 679  
31 680  
32  
33  
34  
35  
36  
37  
38  
39  
40  
41  
42  
43  
44  
45  
46  
47  
48  
49  
50  
51  
52  
53  
54  
55  
56  
57  
58  
59  
60

681 **TABLES**

682

683

684

685

686

687

688

689

690

691 **Table 1.** Demographic and clinical characteristics of the patients.

| Variable                                     | N=20        |
|----------------------------------------------|-------------|
| Age, years, mean (SD)                        | 72.5 (11.4) |
| Range (minimum-maximum)                      | 38-85       |
| Gender, male, N (%)                          | 13 (65.0)   |
| Time since diagnosis, years, mean (SD)       | 2.35 (2.9)  |
| Recent diagnosis (less than 2 months), N (%) | 2 (10.0)    |
| NYHA, N (%)                                  |             |
| I                                            | 4 (20.0)    |
| II                                           | 7 (35.0)    |
| III                                          | 9 (45.0)    |
| LVEF, %, mean (SD)                           | 31.1 (6.0)  |
| Diabetes, type 2, N (%)                      | 9 (45.0)    |

692

693 *LVEF, left ventricular ejection fraction; NYHA, New York Heart Association; SD, standard*  
694 *deviation.*

695

696 **Table 2.** Domains and main perceptions among HFrEF patients.

| Domains                                                  | Patients and caregivers' quotes                                                                                                                                                                                                                                                                                                                                                                                                                                                                                                                                                                                                                                                                                                                                                                                                                                                                                                                                                                                                                                                                                                                                                           |
|----------------------------------------------------------|-------------------------------------------------------------------------------------------------------------------------------------------------------------------------------------------------------------------------------------------------------------------------------------------------------------------------------------------------------------------------------------------------------------------------------------------------------------------------------------------------------------------------------------------------------------------------------------------------------------------------------------------------------------------------------------------------------------------------------------------------------------------------------------------------------------------------------------------------------------------------------------------------------------------------------------------------------------------------------------------------------------------------------------------------------------------------------------------------------------------------------------------------------------------------------------------|
| <b>Domain 1. Meanings related to QoL</b>                 |                                                                                                                                                                                                                                                                                                                                                                                                                                                                                                                                                                                                                                                                                                                                                                                                                                                                                                                                                                                                                                                                                                                                                                                           |
| <i>Attachment to previous routines</i>                   | <p>"This has split my old age in two, having many things to do and not being able to do them because you get very tired. I miss that freedom that I had. Now I feel tied." [1-1]</p> <p>"What I have missed the most is driving, I spent 20 years as a taxi driver." [2-1]</p> <p>"For me quality of life means to go wherever you want, to do strange things." [2-4]</p> <p>"I have always solved the problems that arised, but now I feel impotence because I can't do this anymore." [2-8]</p>                                                                                                                                                                                                                                                                                                                                                                                                                                                                                                                                                                                                                                                                                         |
| <i>Fears of progression</i>                              | <p>"The symptoms depend on the day, they are not permanent, some days you are tired, others not." [2-2]</p> <p>"Before I went out to the country with my dog, and I liked to go out with the bike but I can't anymore, I have to depend on a cane." [2-4]</p> <p>"I was in a good, well-paid job and I liked it, but when this happened, I completely disconnected." [2-8]</p>                                                                                                                                                                                                                                                                                                                                                                                                                                                                                                                                                                                                                                                                                                                                                                                                            |
| <i>Filling out PROM questionnaires</i>                   | <p>"Are you sure of the answer? You barely can walk without taking a break after a few minutes... Are you sure about "rarely"? You feel down quite often" [caregiver of NYHA III patient 2-4].</p> <p>"Not sure how to stick to the last 15 days when I answer these questions. Some days I feel better than others and I cannot possible say how I have been doing only in the past 15 days. I notice a lot of variation". "It is hard to put a number here... And it is even harder because I can only think about a very a low number... I am not ok right now. It is very sad to realise how low I am, how bad is my health now (referring to the VAS score in the EQ-5D-5L questionnaire)". [2-6]</p> <p>"I will help you, mom, you must answer within the suggested scale, from mild to severe... Mild is not what you have here, you have moderate problems to get up or go for a long walk... this other one is not mild either, I've noticed that you frequently feel anxious and sadder than before... Are you sure about this number on the scale? Why do you say 80 out of 100? You are not that OK, mom; I wish you would be that OK" [caregiver of NYHA I patient 1-10]</p> |
| <b>Domain 2. Caregivers' roles</b>                       |                                                                                                                                                                                                                                                                                                                                                                                                                                                                                                                                                                                                                                                                                                                                                                                                                                                                                                                                                                                                                                                                                                                                                                                           |
| <i>Tracking at home</i>                                  | "I keep track of pressure, weight, urine. Every day. I have it written down here in the notebook and I also send it through the hospital's APP. But I really don't know if it is of much use. When I had to call the ambulance everything seemed normal, I kept a similar record in recent days." [caregiver of NYHA III patient 1-6]                                                                                                                                                                                                                                                                                                                                                                                                                                                                                                                                                                                                                                                                                                                                                                                                                                                     |
| <i>Medical appointments</i>                              | <p>"When we go to the hospital the doctors ask him if he sleeps well or if he is drowning and he always answers that he is fine, but he is not. The last time he had been sleeping on the couch because he couldn't sleep in bed even with 3 pillows. That's why I always go to the controls with him." [caregiver of NYHA III patient 2-4]</p> <p>"Doctor, he says that he feels OK, but I noticed that he is more anxious, more obsessed about how many times he goes to pee per day. Most days he gets up and cannot sleep worrying about his condition" [caregiver of NYHA III patient 1-6]</p>                                                                                                                                                                                                                                                                                                                                                                                                                                                                                                                                                                                       |
| <b>Domain 3. Relationships with healthcare providers</b> |                                                                                                                                                                                                                                                                                                                                                                                                                                                                                                                                                                                                                                                                                                                                                                                                                                                                                                                                                                                                                                                                                                                                                                                           |
| <i>Commitment</i>                                        | "I come to the very dedicated medical consultations and with the certainty that I am more closely watched than a Ferrari" [2-5]                                                                                                                                                                                                                                                                                                                                                                                                                                                                                                                                                                                                                                                                                                                                                                                                                                                                                                                                                                                                                                                           |
| <i>Trustworthiness</i>                                   | "I sit in a consultation where they take their time, and they answer all my doubts. The big difference is that now I feel                                                                                                                                                                                                                                                                                                                                                                                                                                                                                                                                                                                                                                                                                                                                                                                                                                                                                                                                                                                                                                                                 |



1  
2  
3  
4  
5  
6  
7  
8  
9  
10  
11  
12  
13  
14  
15  
16  
17  
18  
19  
20  
21  
22  
23  
24  
25  
26  
27  
28  
29  
30  
31  
32  
33  
34  
35  
36  
37  
38  
39  
40  
41  
42  
43  
44  
45  
46  
47  
48  
49  
50  
51  
52  
53  
54  
55  
56  
57  
58  
59  
60

|  |                                                                                                                                                           |
|--|-----------------------------------------------------------------------------------------------------------------------------------------------------------|
|  | more secure, I know that I must deal with weight, urine, food. Having the possibility of calling them 24 hours a day gives you more peace of mind." [2-6] |
|  | "The nurse is better than any cardiologist, everyone loves her." [2-5]                                                                                    |
|  | "The nurse is very close, I think they have chosen a person with a character and attitude that is just what a patient needs." [2-6]                       |

697

698

For peer review only

1  
2  
3 699  
4 700  
5 701  
6 702  
7 703  
8 704  
9  
10  
11  
12  
13

**Table 3.** Evaluation of health status by PROMs. Scores for EQ-5D-5L and KCCQ.

|                                                                                 | NYHA I-II<br>(N=11) | NYHA III<br>(N=9) | All NYHA<br>(N=20) |
|---------------------------------------------------------------------------------|---------------------|-------------------|--------------------|
| EQ-5D-5L, patients reporting any limitation <sup>1</sup> , N (%)                |                     |                   |                    |
| Mobility                                                                        | 5 (40.5)            | 9 (100)           | 14 (70.0)          |
| Self-care                                                                       | 0                   | 7 (77.8)          | 7 (35.0)           |
| Usual activities                                                                | 4 (36.4)            | 8 (88.9)          | 12 (60.0)          |
| Pain/Discomfort                                                                 | 4 (36.4)            | 6 (66.7)          | 10 (50.0)          |
| Anxiety/Depression                                                              | 4 (36.4)            | 8 (88.9)          | 12 (60.0)          |
| EQ-5D-5L, patients reporting severe or extreme limitations <sup>2</sup> , N (%) |                     |                   |                    |
| Mobility                                                                        | 0                   | 5 (55.6)          | 5 (25.0)           |
| Self-care                                                                       | 0                   | 2 (22.2)          | 2 (10.0)           |
| Usual activities                                                                | 0                   | 3 (33.3)          | 3 (15.0)           |
| Pain/Discomfort                                                                 | 1 (9.1)             | 2 (22.2)          | 3 (15.0)           |
| Anxiety/Depression                                                              | 0                   | 2 (22.2)          | 2 (10.0)           |
| EQ-5D-5L global, mean (SD)                                                      |                     |                   |                    |
| Index value                                                                     | 0.85 (0.17)         | 0.37 (0.36)       | 0.64 (0.36)        |
| VAS score                                                                       | 74.55 (23.50)       | 45.56 (14.46)     | 61.50 (24.45)      |
| KCCQ, mean (SD)                                                                 |                     |                   |                    |
| Physical limitation                                                             | 81.06 (19.04)       | 39.72 (26.59)     | 62.46 (30.56)      |
| Symptom stability                                                               | 59.10 (12.61)       | 66.67 (30.62)     | 62.50 (22.21)      |
| Symptom frequency                                                               | 84.66 (17.14)       | 57.64 (27.14)     | 72.50 (25.59)      |
| Symptom burden                                                                  | 91.67 (11.18)       | 61.11 (24.30)     | 77.92 (23.61)      |
| Self-efficacy                                                                   | 94.32 (10.25)       | 85.94 (18.22)     | 90.79 (14.34)      |
| Quality of life                                                                 | 82.58 (13.15)       | 33.33 (20.83)     | 60.42 (30.09)      |
| Social limitation                                                               | 85.61 (14.02)       | 31.94 (26.62)     | 61.46 (33.94)      |
| KCCQ global scores, mean (SD)                                                   |                     |                   |                    |
| Overall summary                                                                 | 82.69 (9.81)        | 41.09 (20.55)     | 63.97 (26.06)      |
| Clinical summary                                                                | 81.30 (10.82)       | 49.55 (22.31)     | 67.01 (23.10)      |
| Total symptom                                                                   | 81.54 (10.85)       | 59.37 (23.50)     | 71.56 (20.55)      |

705 <sup>1</sup>Any score but 1 (no problems).

706 <sup>2</sup> Only patients scoring 4 or 5 in each domain.

707 EQ-5D-5L, EuroQoL 5D-5L questionnaire; KCCQ, Kansas City Cardiomyopathy  
708 Questionnaire; NYHA, New York Heart Association; PRO, patient-reported outcome;  
709 SD, standard deviation; VAS, visual analogue scale.

710  
711  
712



1  
2  
3  
4  
5  
6  
7  
8  
9  
10  
11  
12  
13  
14  
15  
16  
17  
18  
19  
20  
21  
22  
23  
24  
25  
26  
27  
28  
29  
30  
31  
32  
33  
34  
35  
36  
37  
38  
39  
40  
41  
42  
43  
44  
45  
46  
47  
48  
49  
50  
51  
52  
53  
54  
55  
56  
57  
58  
59  
60

**SUPPLEMENTARY MATERIALS**

for

**Quality of life and disease experience in patients with heart failure with reduced ejection fraction in Spain:  
a mixed methods approach to go beyond standardized data**

by Raül Rubio et al.

---

**1. Semi-structured interview guideline (p. 2)**

**2. Observation guideline for medical visits (p. 9)**

For peer review only

## 1. SEMI-STRUCTURED INTERVIEW GUIDELINE [Notes for RESEARCHER in blue].

### Presentation

Thank you for taking part in this interview.

Please note that:

- Your responses are confidential and anonymous. Under no circumstances will your personal data be shared when the results are published. All answers will be treated in aggregate form.
- A Piece of Pie complies with all European and North American data protection laws and complies with the guidelines set by the EphMRA (European Pharmaceutical Market Research Association) codes of conduct for market research.
- You may discontinue your participation in this research at any time and, as well as the right not to answer any questions you do not wish to answer.

With your permission, we will audio record your responses to facilitate our analysis.

*[RESEARCHER: Start recording audio.]*

I will now introduce myself. My name is [XXX], I work for A Piece of Pie, an innovation consulting firm.

We are currently conducting a study on behalf of a pharmaceutical company, which would like to better understand the experience of patients suffering from Heart Failure.

We would be very grateful if you could share with us your personal experience and help us identify areas for improvement throughout your experience, from the moment of the first symptoms to the present.

Please note that there are no right or wrong answers, as we are interested in your opinions and your personal experience with the condition.

## The interview (90 min.)

*RESEARCHER: Tailor the questions to the way the patient refers to the disease and use the term provided by the patient to make him/her feel more comfortable. Whenever you believe that the caregiver could provide us with additional information on any of the topics discussed, please direct questions to him/her as well. If, on the other hand, you have the impression that it will be more valuable to ask certain questions only to the caregiver, do so after the interview with the patient. Always ask the patient for permission before talking to the caregiver.*

| Exploration area         | 1. KNOW THE PATIENT (15 min)                                                                                                                                                                                                     |
|--------------------------|----------------------------------------------------------------------------------------------------------------------------------------------------------------------------------------------------------------------------------|
| Goals                    | <ul style="list-style-type: none"> <li>• <b>Generate a relationship with the patient</b></li> <li>• <b>Better understand the person and their context</b></li> <li>• <b>Understand your daily habits and routines</b></li> </ul> |
| Ethnographic explanation | <i>To begin with, I would like to get to know you as a person and familiarize myself with your personal situation...</i>                                                                                                         |

1. **Person:** I would like you to introduce yourself and explain to me:
  - a) How old are you? Who do you live with?
  - b) Tell me a little more about yourself, what do you like to do? What are your hobbies? What do you do? What do you value most now in your life? Why?
2. **Self-description:** If you were to describe yourself, what 3 words would you use? What comes to mind when you think of yourself?
3. **The patient's day-to-day life:** Tell me what a "typical" day looks like. What do you do from the time you wake up until you go to sleep? Differentiate weekday from weekends (i.e., hobbies). *RESEARCHER: be sure they explain their day to day routines to be able to refer to them later when exploring the impact of the disease. Write down on post-its moments with the greatest impact.*
  - a) What time of day would you say you like best? When do you feel most at ease? Why?
  - b) And what moment do you like the least? Why?
  - c) What things do you have the hardest time doing?
  - d) Is there anything you've had to give up in recent times? What do you miss?
4. **Outside view:** What do you think a good friend of yours or family member would say to me if I asked them what [patient's name] is like?
5. **Values:** If you were to tell a young family member what is most important in life, what would you say to them? Do you have any kind of personal "maxim"? Why do you think it's important? *[RESEARCHER: If health-related issues arise, ask when it became important to have a healthy life in your family and/or social environment]*

|                          |                                                                                                                                                                                          |
|--------------------------|------------------------------------------------------------------------------------------------------------------------------------------------------------------------------------------|
| Exploration area         | <b>2. MEANING OF QUALITY OF LIFE (15 min)</b>                                                                                                                                            |
| Goals                    | <ul style="list-style-type: none"> <li>• Understand what they associate to quality of life</li> <li>• Understand the impact of different HF symptoms on their quality of life</li> </ul> |
| Ethnographic explanation | <i>Now I would like us to talk about those things that for you represent quality of life.</i>                                                                                            |

6. **Quality of Life.** Definition: Now that you have completed this map, how would you define quality of life?
- What things allow you to have quality of life? How do you feel about them?
  - What other things keep you from having a better quality of life? How do you feel about them?
7. **Current feeling:** How do you feel at this moment in your life? Do you have any small rituals that help you in your day to day? *RESEARCHER: Ask about eating habits, physical activity, cultural activities, etc.*
- Is there anything that particularly bothers you? Could you give me an example?
  - What makes you happy?
  - If you could improve 3 things from your day to day, what things would you choose? What would you give up?

|                          |                                                                                                                                                            |
|--------------------------|------------------------------------------------------------------------------------------------------------------------------------------------------------|
| Exploration area         | <b>3. HEART FAILURE (15 min)</b>                                                                                                                           |
| Goals                    | <ul style="list-style-type: none"> <li>• Understand the impact of HF on the patient's life</li> <li>• Understand the patient's perception of HF</li> </ul> |
| Ethnographic explanation | <i>Now I would like you to tell me specifically about the disease you suffer...</i>                                                                        |

8. **HF:** I would like you to explain to me in your own words how do you see heart failure.
9. **Explanation of the disease:** Do you remember how they explained to you what HF was? What words did they use? Who did so? Could it have been done better? What did they miss?
10. **Living with HF:** What is it like to live with HF? When do you feel it becomes more "uphill"? What helps you overcome it?
11. **Other diagnoses:** Are you diagnosed with other diseases? Were they prior to HF? Are they related in any way?

|                          |                                                                                                                                                            |
|--------------------------|------------------------------------------------------------------------------------------------------------------------------------------------------------|
| Exploration area         | <b>4. LIFE JOURNEY (15 min)</b>                                                                                                                            |
| Goals                    | <ul style="list-style-type: none"> <li>• Understand the impact of HF on the patient's life</li> <li>• Understand the patient's perception of HF</li> </ul> |
| Ethnographic explanation | <i>To continue I would like us to briefly talk about the most important moments with the disease ...</i>                                                   |

12. **Significant moments with the disease:** Now I would like you to think about 5-6 significant moments since you were diagnosed with the disease. *RESEARCHER: Write down every moment in a post-it. Pay attention to whether hospitalization, transplant or heart attack arise spontaneously and if not, ask if you have experienced any of these moments and if so write them down next to the other moments.*
- Why have you precisely chosen these moments?
  - How did you experience each of these moments?
  - Which one of them was the best moment for you? *RESEARCHER: Ask what "the best" means to this patient*
  - Which one of them was the worst moment for you? *RESEARCHER: Ask what "the worst" means and, if it is related to the patient's illness, ask: → Is there anything that could have better helped you cope during those times?*
  - Which of these moments changed your life the most? Why?
13. **Life before HF:** What was your life like before you were diagnosed with HF? What things have changed the most? What do you miss?
- Since you were diagnosed... how has your lifestyle changed? How do you feel about it? What could help you?
  - At the beginning of the interview, you explained to me what a day in your life looks like. How would this change if life were the way it used to be?
  - Could you specify how you think the disease changed your life? *[RESEARCHER: dig into issues such as new interpretations of reality, changes in values, etc.]*

|                          |                                                                                                                                                                                                                          |
|--------------------------|--------------------------------------------------------------------------------------------------------------------------------------------------------------------------------------------------------------------------|
| Exploration area         | <b>5. CARE AND EMOTIONAL PROCESS (20 min.)</b>                                                                                                                                                                           |
| Goals                    | <ul style="list-style-type: none"> <li>• Understand the HF Patient Journey</li> <li>• Identify unmet needs</li> <li>• Understand the perception of the different treatments that the patient has gone through</li> </ul> |
| Ethnographic explanation | <i>Now I would like us to delve into the journey you have followed since the beginning of the risk factors until now...</i>                                                                                              |

Let's assume that you meet a person who has just been diagnosed with heart failure and does not know what it means to suffer from this condition. If you asked him to tell you about your experience, from the first symptoms until today

14. **Life without the disease:** What was your life like before the disease? If you look back, what do you miss the most?
15. **Previous diseases:** What diseases have you been diagnosed with? Who diagnosed you?
  - a) Were you warned of the risk of developing heart failure?
  - b) What did they explain to you?
  - c) Were you advised to make lifestyle changes? *RESEARCHER, ask about exercise, diet, tobacco, or alcohol consumption...*
  - d) Were you given any preventive treatment?
16. **First symptoms:**
  - a) What changes did you experience that made you think something was wrong? For how long?
  - b) What did you think might be going on?
17. **Diagnosis:**
  - a) Do you remember what was explained to you?
  - b) What tests have you done? Was the process burdensome?
  - c) What doubts did you have?
  - d) What did you think was going to happen at the time?
  - e) Did you search for information on the internet?
  - f) Did you contact any patient associations?
  - g) Have you met anyone with this condition during the process? How has it affected you?
18. **First treatment:**
  - a) Do you remember the name of your treatment?
  - b) How was the first medication taken?
  - c) Did you have any routines to do so?
  - d) Did you stop taking the treatment at some point?
19. **Follow-up visits:**
  - a) What were the routines of the visits like?

- b) Was it hard for you to make them? Currently, how do you feel when you must go to the doctor?
20. **Evolution of the disease:**
- a) How did you find out that the disease was changing? Were there any significant moments?
21. **Hospital admission (if applies):**
- a) What was the process like? How many days last the hospital admission?
- b) How was the experience in the emergency room?
- c) Have you had more than one hospital admission?
22. **Surgery (if applies):**
- a) What kind of device was implanted? Would you be able to explain how it works?
- b) What things does it allow you to do that you couldn't do before? How does this make you feel?
- c) What things can't you do now? How does this make you feel?
23. **Experience PROM questionnaires:** before the interview you answered a set of questionnaires about your symptoms and quality of life.
- a) From what we talked about during the interview, what things do you think should be included in these questionnaires?
- b) What things should your cardiologist know to make decisions?

| Exploration area         | 6. HOME TOUR (10 min.)                                                                                                                                                                                                                                                      |
|--------------------------|-----------------------------------------------------------------------------------------------------------------------------------------------------------------------------------------------------------------------------------------------------------------------------|
| Goals                    | <ul style="list-style-type: none"> <li>• Complement and contrast the information obtained during the interview with the patient's environment.</li> <li>• Understand the immediate context in which patients live (routines, rituals, and concessions to the HF)</li> </ul> |
| Ethnographic explanation | <i>For us it would be very useful to be able to understand how the disease affects your day to day. If you could show us your house, please, I'm sure it would help us understand...</i>                                                                                    |

*RESEARCHER: The home visit should be made at the appropriate time during the interview. It should be done naturally as a continuation of the conversation: asking for places and things inside the house (medicines, refrigerator, sofa, bedroom) that are important in terms of the impact that HF has on your life be shown.*

*For instance, ask whether there has been any home reform since they have had HF diagnosed. As you walk around, ask the patient about their daily routines and their life under treatment. Try to understand how the patient has adapted his/her life to the disease and his/her level of activity.*

*If the participant does not mention anything spontaneously, focus on:*

- Evidence that signals his/her 'lifestyle', hobbies.
- Written information about HF.
- Evidence of contact with HCPs.

- *Rooms where she/he takes treatment or workout.*
- *Rooms where medicines are stored.*

*Please, contrast the information mentioned during the interview with what you observe in the house. If allowed by the participant, take pictures of everything the patient deems relevant to treatment and their life with HF.*

With this we would conclude the interview. Thank you very much for your time and participation. Do you have any comments or questions you want to share?

**[END RECORDING]**

For peer review only



## 2. OBSERVATION GUIDE OF MEDICAL APPOINTMENTS WITH HCPS

This guide is intended to guide the observation before, during and after the medical visit of selected patients. During the appointment, neither the patient nor the doctor will be asked questions by the researcher.

The objectives of the visit are:

1. Observe whether which topics are discussed during the medical appointment, and whether any of them is directly related to quality of life with the condition.
2. Understand the language that is used by both parties when talking about the condition.

*RESEARCHER, prior to the visit, make sure that the patient understands the purpose of the observation within the study.*

### I – PRE-VISIT: Observation of the hospital environment

*RESEARCHER, indicate the center, scheduled time of the visit and the start time of the observation.*

*Begin by observing the **hospitals environment**. What surprises you the most? Why?*

*Focus on:*

- Occupancy of the center: number of patients in the waiting room, number of health workers.
- Space: design, decoration, lighting, colors, atmosphere.
- Organization: Allocation and ease of access.

*Observe the **interviewee**. What does he/she look like? (For example, tired, relaxed, irritated, etc.) Is there anything that stands out? Inquire about your expectations before the visit.*

*Focus on:*

- Arrival time, ease of access, companions (if applies).
- Body posture and non-verbal signs (facial expression, comfort level with the accompanying situation).
- Preparation for the visit: if the patient brings documents, medical tests, notebooks or tracking applications.
- Waiting times for the visit.
- If applies: Interaction with other health agents (residents, reception, nursing).

### II – DURING THE VISIT: Observation of the patient medical interaction

*RESEARCHER: Describe the physical space, organization, and arrangement of furniture. Also write down the exact time of the start of the visit.*

*Focus on:*

- Initial time of the visit.
- Initial greeting, use of gestures and non-verbal cues.
- Initial conversation. How general are they? How specific?
  - Questions from the doctor, order, and type.

- On quality of life and/or impact of HF on a day-to-day basis.
    - Type of assessment and use of questionnaires.
    - Types of recommendations (functional, social, quality of life).
    - How the patient responds.
  - Questions from the patient, order, and type.
    - On quality of life and/or impact of HF on a day-to-day basis.
    - How your doctor responds
- Central conversation:
  - Topics of conversation that arouse greater patient attention (e.g., quality of life, impact on daily activity).
  - Topics of conversation that arouse greater attention from the doctor (e.g., clinical, psychological, or social, quality of life or other aspects).
  - Dominant language; use of colloquial language vs medical language.
- Body posture, proxemics and physical distance from the patient and the doctor during the visit.
- Use of silences and non-verbal gestures (gestures of approval, doubt, or confusion).
- Closing of the visit
  - Time and language used for the closing of the visit.
  - Approach of next steps by the doctor and the patient.
  - Farewell, use of gestures and non-verbal cues.
- If applies: interaction with other health agents (residents, receptionist, nursing).

### III – AFTER THE VISIT: Observation of the patient

*RESEARCHER: Write down the exact **time of the end** of the visit. Accompany the patient at the exit of the visit and / or another instance of contact related to the visit (reception desks). If possible, know your perception about the results of the visit.*

*Focus on:*

- End time/duration of the visit.
- The patient's body posture and non-verbal gestures.
- Language used to assess the visit.
- If applies: interaction with other health agents (residents, reception, nursing).

End of observation.\*\*\*

## ETHNOQOL – COREQ CHECKLIST

5 October 2021

| No.                                            | Item                                     | Description                                                                                                                                                                                                                        | Section #                             |
|------------------------------------------------|------------------------------------------|------------------------------------------------------------------------------------------------------------------------------------------------------------------------------------------------------------------------------------|---------------------------------------|
| <b>Domain 1: Research team and reflexivity</b> |                                          |                                                                                                                                                                                                                                    |                                       |
| Personal characteristics                       |                                          |                                                                                                                                                                                                                                    |                                       |
| 1.                                             | Interviewer/facilitator                  | Which author/s conducted the interview or focus group?<br><i>SCC</i><br><i>MFE</i>                                                                                                                                                 | Line 201                              |
| 2.                                             | Credentials                              | What were the researcher's credentials? <i>E.g.</i><br><i>PhD, MD</i><br><i>SCC, PhD</i><br><i>MFE, BA</i>                                                                                                                         | NA                                    |
| 3.                                             | Occupation                               | What was their occupation at the time of the study?<br><i>Senior researchers</i>                                                                                                                                                   | Line 201                              |
| 4.                                             | Gender                                   | Was the researcher male or female?<br><i>Female</i>                                                                                                                                                                                | Line 201                              |
| 5.                                             | Experience and training                  | What experience or training did the researcher have?<br><i>&gt;5 years of experience in medical sociology and medical anthropology</i>                                                                                             | Line 202                              |
| Relationship with participants                 |                                          |                                                                                                                                                                                                                                    |                                       |
| 6.                                             | Relationship established                 | Was a relationship established prior to study commencement?<br><i>No.</i>                                                                                                                                                          | Line 204                              |
| 7.                                             | Participant knowledge of the interviewer | What did the participants know about the researcher? <i>E.g. Personal goals, reasons for doing the research</i><br><i>Research goals</i>                                                                                           | Line 205                              |
| 8.                                             | Interviewer characteristics              | What characteristics were reported about the interviewer/facilitator? <i>E.g. Bias, assumptions, reasons and interests in the research topic</i><br><i>None.</i>                                                                   | NA                                    |
| <b>Domain 2: Study design</b>                  |                                          |                                                                                                                                                                                                                                    |                                       |
| Theoretical framework                          |                                          |                                                                                                                                                                                                                                    |                                       |
| 9.                                             | Methodological orientation and theory    | What methodological orientation was stated to underpin the study? <i>E.g. grounded theory, discourse analysis, ethnography, phenomenology, content analysis</i><br><i>Thematic analysis</i><br><i>Phenomenological perspective</i> | Lines 150-161, and section on Methods |
| Participant selection                          |                                          |                                                                                                                                                                                                                                    |                                       |
| 10.                                            | Sampling                                 | How were participants selected? <i>E.g. purposive, convenience, consecutive, snowball</i><br><i>Purposeful</i>                                                                                                                     | Line 194                              |
| 11.                                            | Method of approach                       | How were participants approached? <i>E.g. face-to-face, telephone, mail, email</i>                                                                                                                                                 | Lines 186-196                         |

|                                        |                                |                                                                                                                                                            |                                       |
|----------------------------------------|--------------------------------|------------------------------------------------------------------------------------------------------------------------------------------------------------|---------------------------------------|
|                                        |                                | <i>face-to-face</i>                                                                                                                                        |                                       |
| 12.                                    | Sample size                    | How many participants were in the study?<br><b>20</b>                                                                                                      | Line 194<br>and 287                   |
| 13.                                    | Non-participation              | How many people refused to participate or dropped out? What were the reasons for this?<br><b>None</b>                                                      | Lines 186-<br>294                     |
| <b>Setting</b>                         |                                |                                                                                                                                                            |                                       |
| 14.                                    | Setting of data collection     | Where was the data collected? <i>E.g. home, clinic, Workplace</i><br><b><i>Patients' home</i></b>                                                          | Lines 198-<br>232                     |
| 15.                                    | Presence of non-participants   | Was anyone else present besides the participants and researchers?<br><b>No.</b>                                                                            | Lines 198-<br>232                     |
| 16.                                    | Description of sample          | What are the important characteristics of the sample? <i>E.g. demographic data, date</i><br><b><i>demographic data and clinic characteristics</i></b>      | Lines 286-<br>294 and<br>Table 1      |
| <b>Data collection</b>                 |                                |                                                                                                                                                            |                                       |
| 17.                                    | Interview guide                | Were questions, prompts, guides provided by the authors? Was it pilot tested?<br><b>Yes. No pilot tested.</b>                                              | See<br>Suppleme<br>ntary<br>Materials |
| 18.                                    | Repeat interviews              | Were repeat interviews carried out? If yes, how many?<br><b>No.</b>                                                                                        | NA                                    |
| 19.                                    | Audio/visual recording         | Did the research use audio or visual recording to collect the data?<br><b>Yes, audio recording.</b>                                                        | Lines 229-<br>232                     |
| 20.                                    | Field notes                    | Were field notes made during and/or after the interview or focus group?<br><b>During interviews and after direct observations of medical appointments.</b> | Lines 229-<br>232                     |
| 21.                                    | Duration                       | What was the duration of the interviews or focus group?<br><b>90 min for interviews and 20 min for clinical encounters.</b>                                | Line 206,<br>222                      |
| 22.                                    | Data saturation                | Was data saturation discussed?<br><b>Yes, in joint analysis sessions with authors.</b>                                                                     | Line 280                              |
| 23.                                    | Transcripts returned           | Were transcripts returned to participants for comment and/or correction?<br><b>No.</b>                                                                     | NA                                    |
| <b>Domain 3: analysis and findings</b> |                                |                                                                                                                                                            |                                       |
| <b>Data analysis</b>                   |                                |                                                                                                                                                            |                                       |
| 24.                                    | Number of data coders          | How many data coders coded the data?<br><b>The two field researchers</b>                                                                                   | Line 270                              |
| 25.                                    | Description of the coding tree | Did authors provide a description of the coding tree?<br><b>Authors provided the description of domains, no coding tree.</b>                               | Lines 267-<br>279                     |
| 26.                                    | Derivation of themes           | Were themes identified in advance or derived from the data?<br><b>Derived from data.</b>                                                                   | Lines 267-<br>279                     |

|           |                              |                                                                                                                                                         |                                         |
|-----------|------------------------------|---------------------------------------------------------------------------------------------------------------------------------------------------------|-----------------------------------------|
| 27.       | Software                     | What software, if applicable, was used to manage the data?<br><b>No.</b>                                                                                | <b>NA</b>                               |
| 28.       | Participant checking         | Did participants provide feedback on the findings?<br><b>No.</b>                                                                                        | <b>NA</b>                               |
| Reporting |                              |                                                                                                                                                         |                                         |
| 29.       | Quotations presented         | Were participant quotations presented to illustrate the themes / findings? Was each quotation identified? <i>E.g. Participant number</i><br><b>Yes.</b> | <b>Table 2</b>                          |
| 30.       | Data and findings consistent | Was there consistency between the data presented and the findings?<br><b>Yes, in joint analysis sessions.</b>                                           | <b>Lines 267-279</b>                    |
| 31.       | Clarity of major themes      | Were major themes clearly presented in the findings?<br><b>Yes, in joint analysis sessions.</b>                                                         | <b>See Results section</b>              |
| 32.       | Clarity of minor themes      | Is there a description of diverse cases or discussion of minor themes?<br><b>Yes.</b>                                                                   | <b>Yes, Table 2 and Results section</b> |
